# Supplementary material
Source: PubMed Central journal article supplement (PMC6013661)
Supplement: IAI.00060-18_zii999092448s1.pdf [file IAI.00060-18_zii999092448s1.pdf]

## Figure S1

**Analysis of the dynamics of the gut microbiota. A:** Principal component analysis of square-root transformed relative abundances. **B:** Network analysis using Spearman (left) and Pearson (right) correlations.

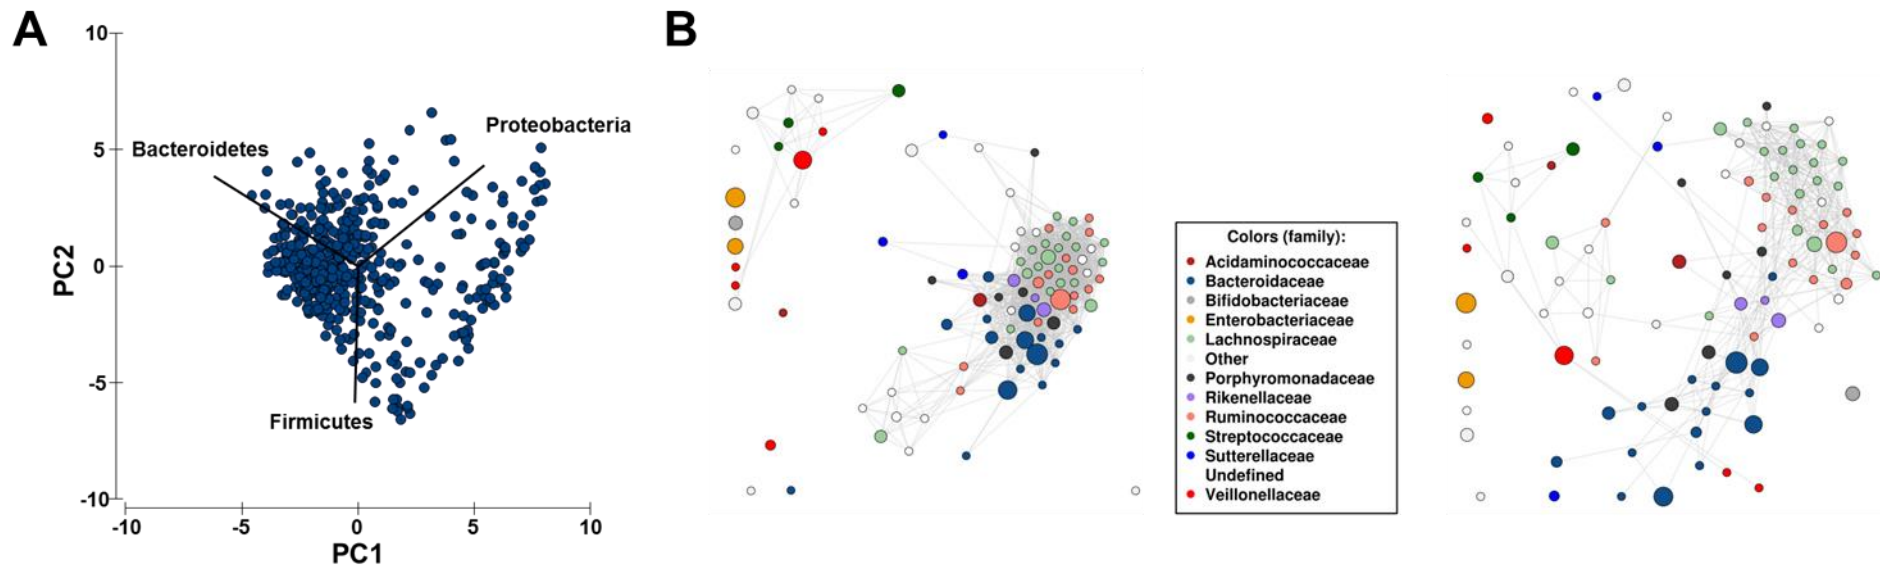

**Figure S2**

**Dynamics of the gut microbiota in healthy individuals.** Principal component analysis of square-root transformed relative abundances shows samples from Australia, France, Chile and Japan (n= 688 samples from 590 individuals) clustering into enterotypes dominated by *Bacteroides*, *Prevotella*, *Akkermansia* or *Faecalibacterium*.

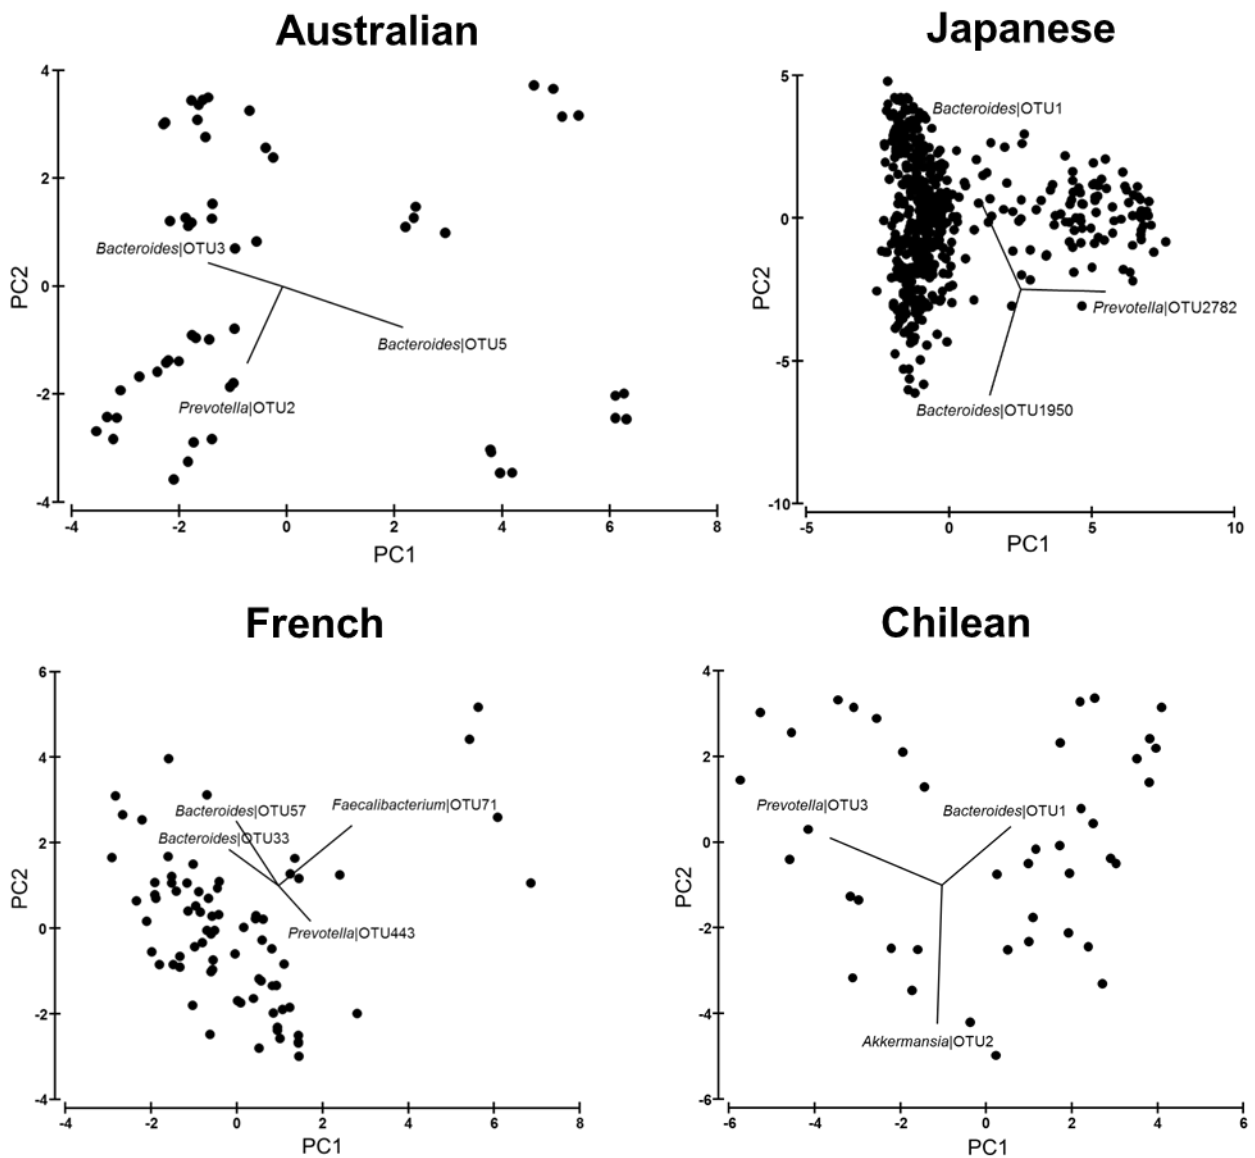

### Figure S3

**Analysis of patient microbiome enterotypes.** Plots are non-metric multidimensional scaling plots on Bray-Curtis resemblance of square-root transformed relative abundances. **A:** Samples were separated into two groups according to their levels of Proteobacteria, with a relative abundance of 25% used as a cut-off (Yes: High Proteobacteria; No: Low Proteobacteria). **B:** Dirichlet multinomial mixtures partitioned patient microbiomes into two groups dominated by *Bacteroides* (partition 2) or *Escherichia/Shigella* (partition 1). Partition 1 had an average relative abundance of *Bacteroides* OTU0001=21.4%, *Escherichia/Shigella* OTU0002=28.8%, while partition 2 contained *Bacteroides* OTU0001=44.5%, *Escherichia/Shigella* OTU0002=7.3%. 88% of samples classified to *Escherichia/Shigella*-dominated enterotype (Panel A, blue) were classified into partition 1 (blue).

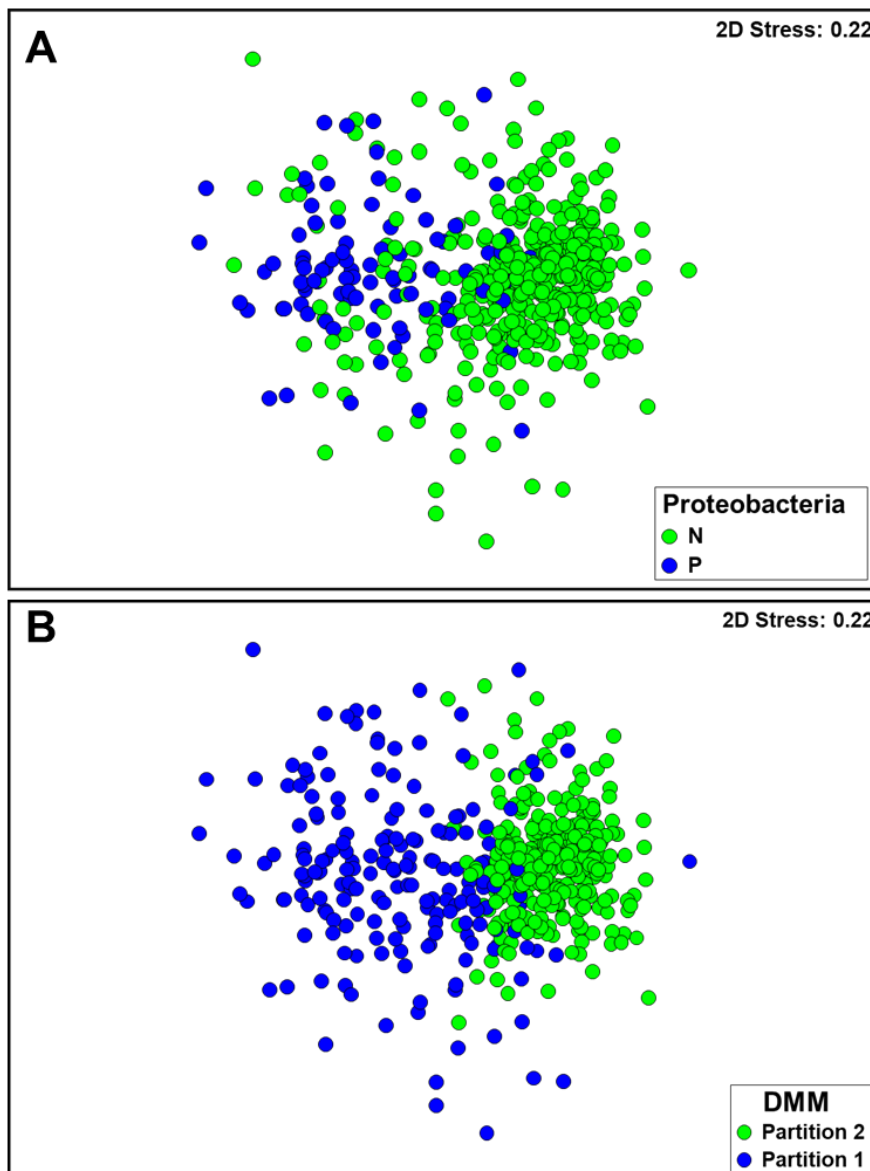

**Figure S4**

**Microbial diversity across colour and consistency of faecal samples.** Evenness (A) and Shannon's diversity (B) analysed across sample colour. Evenness (C) and Shannon's diversity (D) analysed across sample consistency. **E:** Hierarchical clustering of OTUs across colour and consistency. **F:** Hierarchical clustering of sample distribution across colour and consistency. Red bar indicate an enrichment of liquid and colours other than brown.

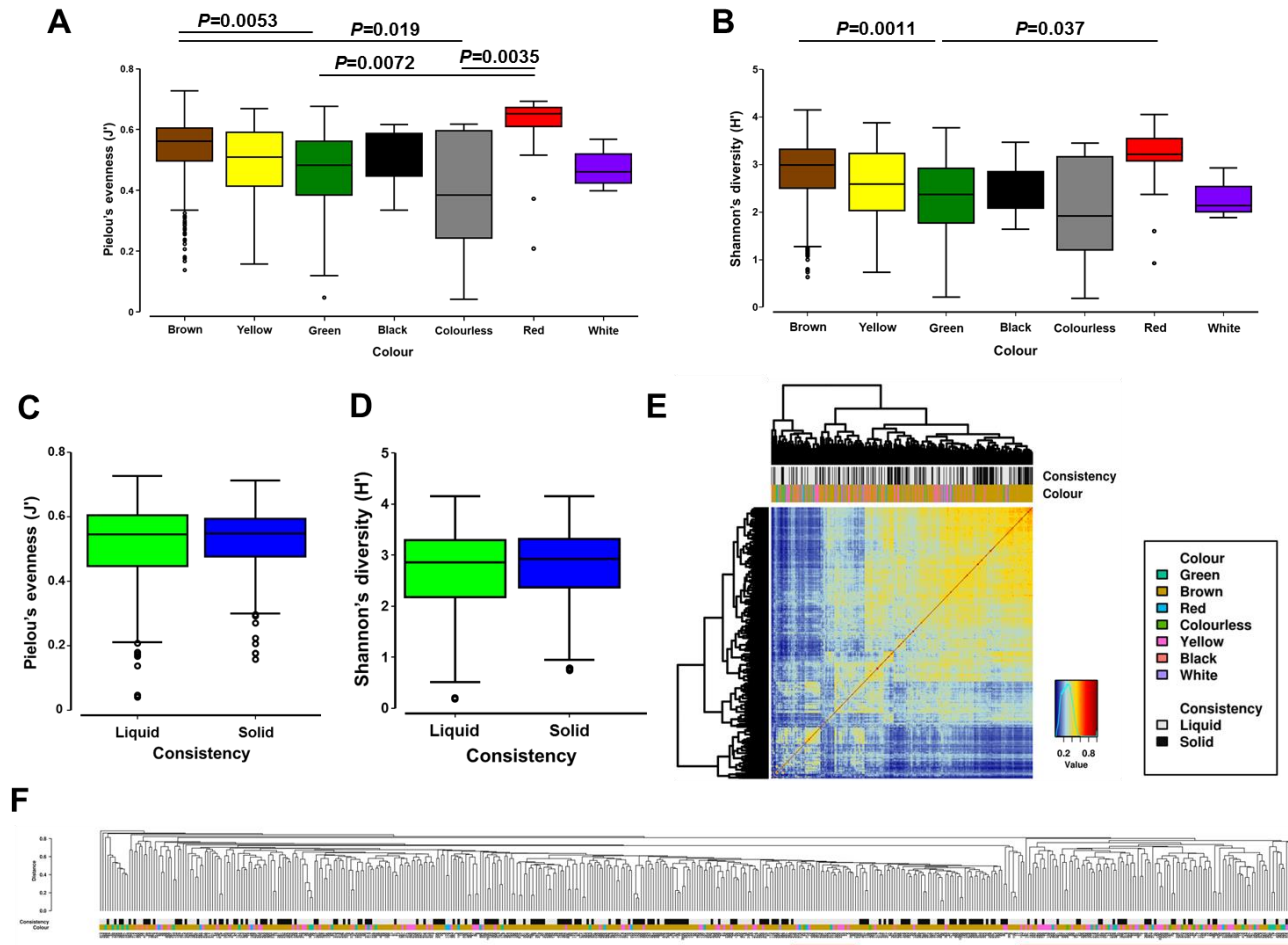

Figure S5

Krona plots of average relative abundance across colour and consistency.

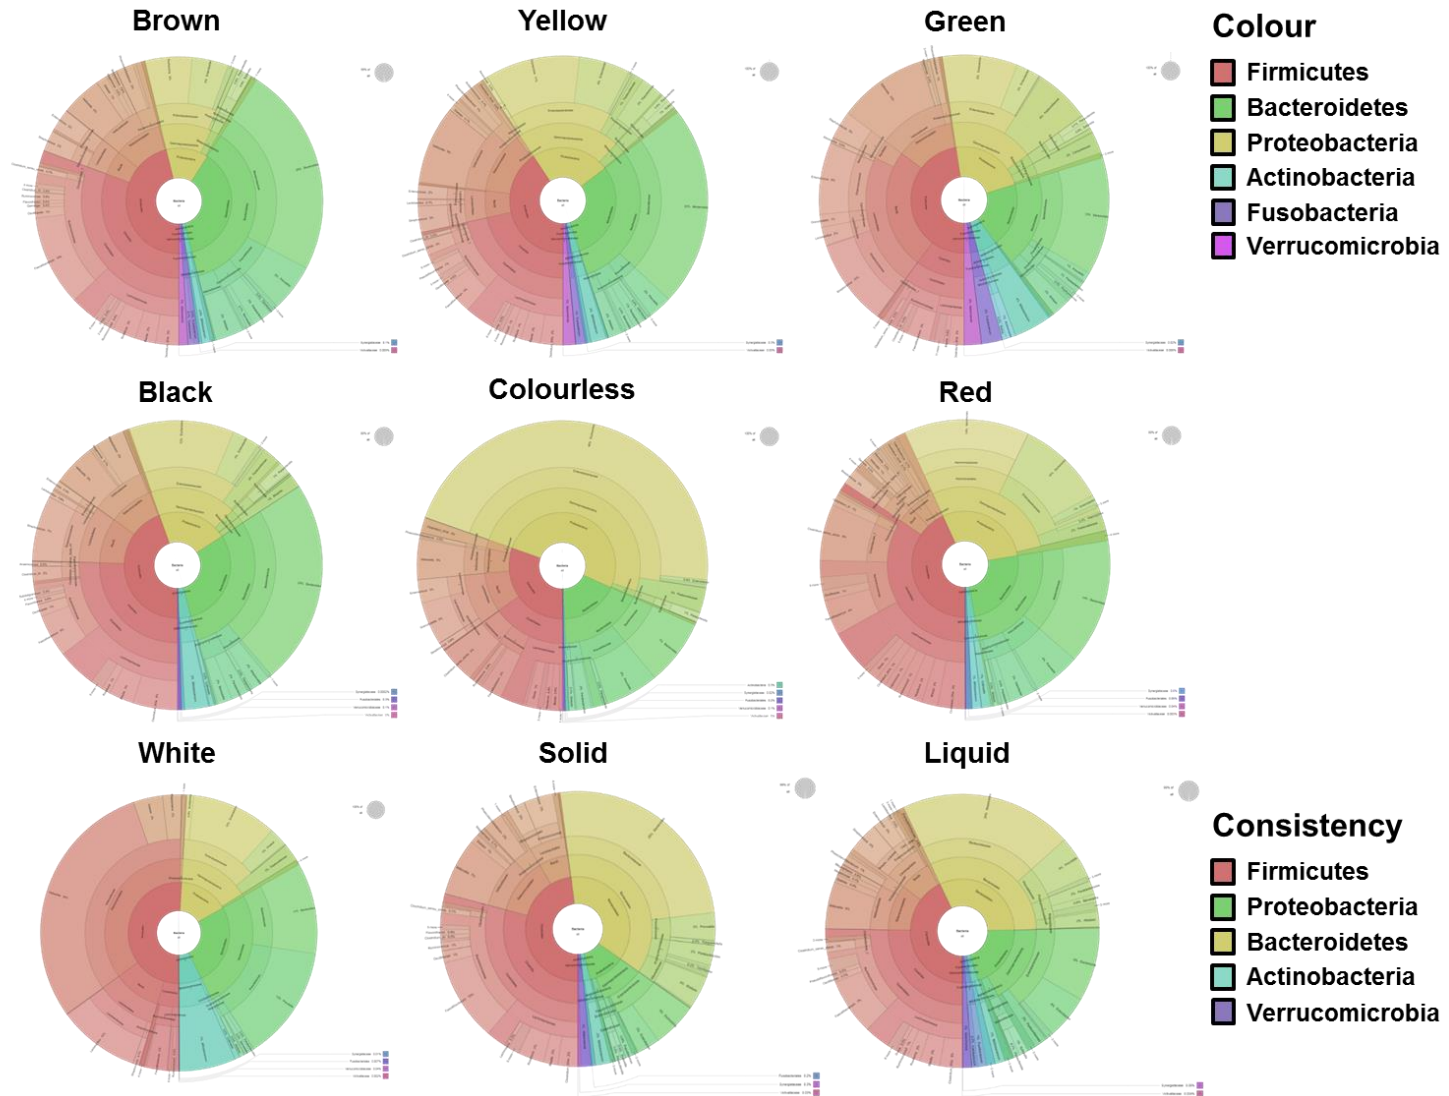

Figure S6

Boxplot of relative abundance of microbial taxa of interest across colour and consistency. **A:** *Bacteroides*, **B:** *Faecalibacterium*, **C:** *Bacteroides*, **D:** *Escherichia/Shigella*, **E:** *Faecalibacterium*.

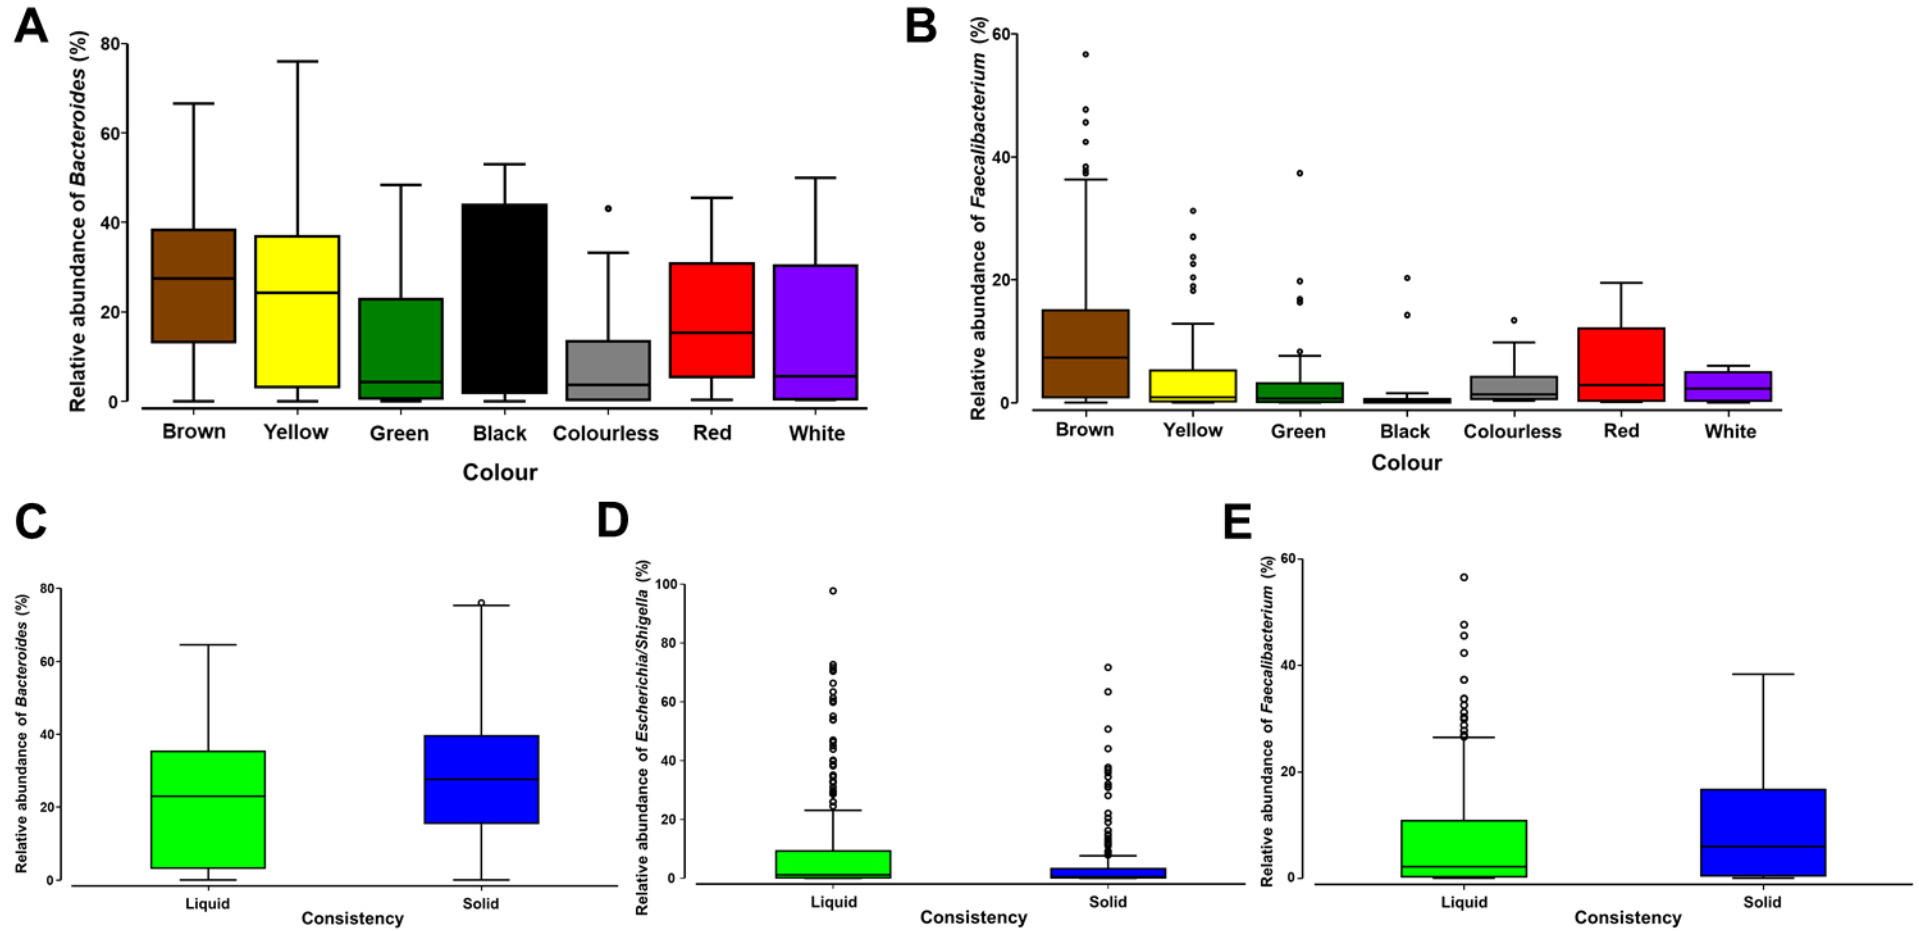

**Figure S7**

**Data distribution and reproducibility.** **A:** Square-root transformation shows a marked improvement in distribution of data. **B:** Cluster analysis of replicates following Bray-Curtis resemblance shows highly reproducible results.

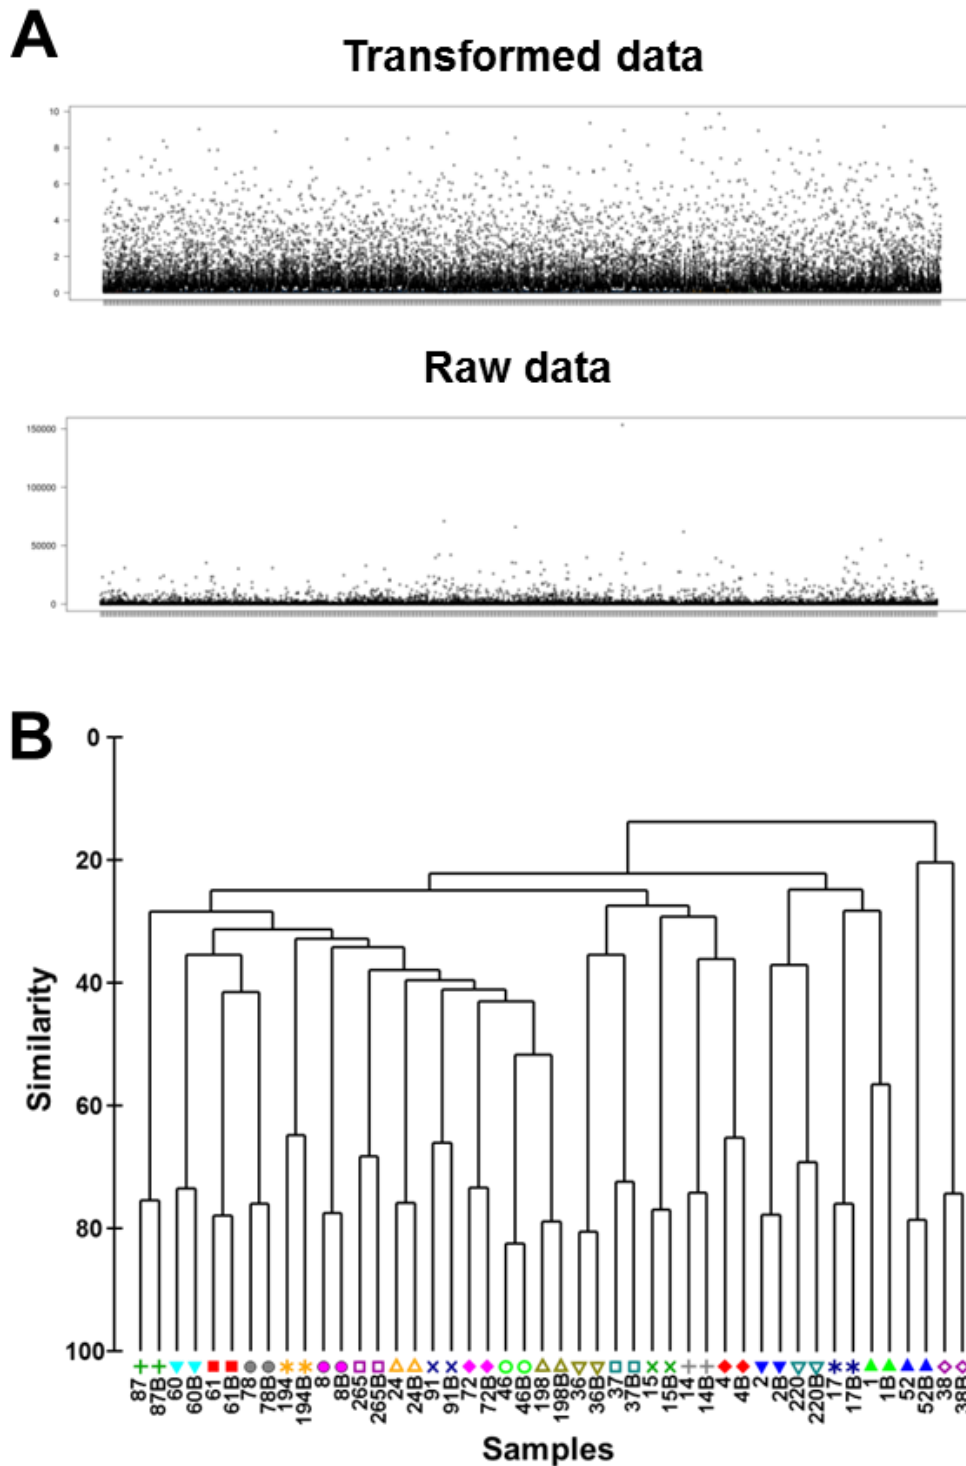

**Table S1**

**Microbial taxa enriched in samples within the *Escherichia/Shigella* enterotype.** Analysis was performed using LEfSe. N: Not enriched with Proteobacteria; P: Enriched with Proteobacteria.

| <b>Taxa</b>                                                                              | <b>Group</b> | <b>LDA Score</b> | <b>P-value</b> |
|------------------------------------------------------------------------------------------|--------------|------------------|----------------|
| Actinobacteria.Actinobacteria.Actinomycetales                                            | P            | 3.336211         | 4.4E-12        |
| Actinobacteria.Actinobacteria.Actinomycetales.Actinomycetaceae                           | P            | 3.146894         | 1.82E-06       |
| Actinobacteria.Actinobacteria.Actinomycetales.Actinomycetaceae.Actinomyces               | P            | 3.135554         | 2.41E-06       |
| Actinobacteria.Actinobacteria.Actinomycetales.Actinomycetaceae.Actinomyces.Otu0094       | P            | 2.872944         | 9.09E-05       |
| Actinobacteria.Actinobacteria.Actinomycetales.Actinomycetaceae.Actinomyces.Otu0151       | P            | 2.691813         | 0.001029       |
| Actinobacteria.Actinobacteria.Actinomycetales.Actinomycetaceae.Actinomyces.Otu0861       | P            | 2.120078         | 0.015802       |
| Actinobacteria.Actinobacteria.Actinomycetales.Actinomycetaceae.Actinomyces.Otu4345       | P            | 2.283646         | 0.000264       |
| Actinobacteria.Actinobacteria.Actinomycetales.Actinomycetaceae.Actinomyces.Otu4436       | P            | 2.286324         | 0.03557        |
| Actinobacteria.Actinobacteria.Actinomycetales.Actinomycetaceae.Actinomyces.Otu4923       | P            | 2.544935         | 0.03557        |
| Actinobacteria.Actinobacteria.Actinomycetales.Corynebacteriaceae.Corynebacterium.Otu4742 | P            | 2.502213         | 0.03557        |
| Actinobacteria.Actinobacteria.Actinomycetales.Dermabacteraceae                           | P            | 2.548915         | 0.03557        |
| Actinobacteria.Actinobacteria.Actinomycetales.Dermabacteraceae.Dermabacter               | P            | 2.548293         | 0.03557        |
| Actinobacteria.Actinobacteria.Actinomycetales.Dermabacteraceae.Dermabacter.Otu6721       | P            | 2.474229         | 0.03557        |
| Actinobacteria.Actinobacteria.Actinomycetales.Dermacoccaceae                             | P            | 2.478681         | 0.03557        |
| Actinobacteria.Actinobacteria.Actinomycetales.Dermacoccaceae.Dermacoccus                 | P            | 2.608146         | 0.03557        |
| Actinobacteria.Actinobacteria.Actinomycetales.Dermacoccaceae.Dermacoccus.Otu2261         | P            | 2.430589         | 0.03557        |
| Actinobacteria.Actinobacteria.Actinomycetales.Microbacteriaceae.Cryobacterium            | P            | 2.305918         | 0.002926       |
| Actinobacteria.Actinobacteria.Actinomycetales.Microbacteriaceae.Cryobacterium.Otu6532    | P            | 2.265789         | 0.002926       |
| Actinobacteria.Actinobacteria.Actinomycetales.Microbacteriaceae.Leucobacter              | P            | 2.497168         | 0.03557        |
| Actinobacteria.Actinobacteria.Actinomycetales.Microbacteriaceae.Leucobacter.Otu5265      | P            | 2.340917         | 0.03557        |
| Actinobacteria.Actinobacteria.Actinomycetales.Micrococcaceae                             | P            | 2.862467         | 1.37E-10       |
| Actinobacteria.Actinobacteria.Actinomycetales.Micrococcaceae.Rothia                      | P            | 2.82767          | 8.58E-10       |
| Actinobacteria.Actinobacteria.Actinomycetales.Micrococcaceae.Rothia.Otu0163              | P            | 2.820782         | 7.56E-10       |
| Actinobacteria.Actinobacteria.Actinomycetales.Micrococcaceae.Rothia.Otu5549              | P            | 2.426356         | 0.03557        |
| Actinobacteria.Actinobacteria.Actinomycetales.Micrococcaceae.Rothia.Otu6730              | P            | 2.063287         | 0.03557        |



|                                                                                                                                                |   |          |          |
|------------------------------------------------------------------------------------------------------------------------------------------------|---|----------|----------|
| Actinobacteria.Actinobacteria.Bifidobacteriales.Bifidobacteriaceae.Bifidobacteriaceae_unclassified.Otu6904                                     | P | 2.596543 | 0.03557  |
| Actinobacteria.Actinobacteria.Bifidobacteriales.Bifidobacteriaceae.Bifidobacterium                                                             | P | 3.388466 | 0.031407 |
| Actinobacteria.Actinobacteria.Bifidobacteriales.Bifidobacteriaceae.Bifidobacterium.Otu0013                                                     | P | 3.391552 | 0.024476 |
| Actinobacteria.Actinobacteria.Bifidobacteriales.Bifidobacteriaceae.Bifidobacterium.Otu3821                                                     | P | 2.298118 | 0.03557  |
| Actinobacteria.Actinobacteria.Bifidobacteriales.Bifidobacteriaceae.Bifidobacterium.Otu4403                                                     | P | 2.380748 | 0.03557  |
| Actinobacteria.Actinobacteria.Bifidobacteriales.Bifidobacteriaceae.Bifidobacterium.Otu7145                                                     | P | 2.241055 | 0.03557  |
| Actinobacteria.Actinobacteria.Bifidobacteriales.Bifidobacteriaceae.Scardovia.Otu4506                                                           | P | 2.535713 | 0.03557  |
| Actinobacteria.Actinobacteria.Coriobacteriales                                                                                                 | N | 3.295671 | 4.22E-10 |
| Actinobacteria.Actinobacteria.Coriobacteriales.Coriobacteriaceae                                                                               | N | 3.295671 | 4.22E-10 |
| Actinobacteria.Actinobacteria.Coriobacteriales.Coriobacteriaceae.Asaccharobacter.Otu5498                                                       | P | 2.406852 | 0.03557  |
| Actinobacteria.Actinobacteria.Coriobacteriales.Coriobacteriaceae.Atopobium                                                                     | N | 2.648583 | 0.001108 |
| Actinobacteria.Actinobacteria.Coriobacteriales.Coriobacteriaceae.Atopobium.Otu0119                                                             | N | 2.669449 | 0.00102  |
| Actinobacteria.Actinobacteria.Coriobacteriales.Coriobacteriaceae.Collinsella                                                                   | N | 2.971856 | 7.37E-08 |
| Actinobacteria.Actinobacteria.Coriobacteriales.Coriobacteriaceae.Collinsella.Otu0088                                                           | N | 2.94087  | 1.43E-06 |
| Actinobacteria.Actinobacteria.Coriobacteriales.Coriobacteriaceae.Eggerthella                                                                   | N | 2.146191 | 3.48E-06 |
| Actinobacteria.Actinobacteria.Coriobacteriales.Coriobacteriaceae.Eggerthella.Otu0261                                                           | N | 2.126866 | 4.89E-06 |
| Armatimonadetes                                                                                                                                | P | 2.260325 | 0.03557  |
| Armatimonadetes.Armadimonadetes_gp5                                                                                                            | P | 2.360245 | 0.03557  |
| Armatimonadetes.Armadimonadetes_gp5.Armadimonadetes_gp5_unclassified                                                                           | P | 2.467773 | 0.03557  |
| Armatimonadetes.Armadimonadetes_gp5.Armadimonadetes_gp5_unclassified.Armadimonadetes_gp5_unclassified                                          | P | 2.557918 | 0.03557  |
| Armatimonadetes.Armadimonadetes_gp5.Armadimonadetes_gp5_unclassified.Armadimonadetes_gp5_unclassified.Armadimonadetes_gp5_unclassified         | P | 2.428138 | 0.03557  |
| Armatimonadetes.Armadimonadetes_gp5.Armadimonadetes_gp5_unclassified.Armadimonadetes_gp5_unclassified.Armadimonadetes_gp5_unclassified.Otu4094 | P | 2.373758 | 0.03557  |
| Bacteria_unclassified                                                                                                                          | N | 3.50565  | 3.94E-07 |
| Bacteria_unclassified.Bacteria_unclassified                                                                                                    | N | 3.50565  | 3.94E-07 |
| Bacteria_unclassified.Bacteria_unclassified.Bacteria_unclassified                                                                              | N | 3.50565  | 3.94E-07 |
| Bacteria_unclassified.Bacteria_unclassified.Bacteria_unclassified.Bacteria_unclassified                                                        | N | 3.50565  | 3.94E-07 |
| Bacteria_unclassified.Bacteria_unclassified.Bacteria_unclassified.Bacteria_unclassified.Bacteria_unclassified                                  | N | 3.50565  | 3.94E-07 |
| Bacteria_unclassified.Bacteria_unclassified.Bacteria_unclassified.Bacteria_unclassified.Bacteria_unclassified.Otu0073                          | N | 2.989044 | 5.14E-06 |
| Bacteria_unclassified.Bacteria_unclassified.Bacteria_unclassified.Bacteria_unclassified.Bacteria_unclassified.Otu0096                          | N | 2.979689 | 0.000697 |
| Bacteria_unclassified.Bacteria_unclassified.Bacteria_unclassified.Bacteria_unclassified.Bacteria_unclassified.Otu0128                          | N | 2.664046 | 0.020797 |
| Bacteria_unclassified.Bacteria_unclassified.Bacteria_unclassified.Bacteria_unclassified.Bacteria_unclassified.Otu0482                          | P | 2.072274 | 0.000578 |
| Bacteria_unclassified.Bacteria_unclassified.Bacteria_unclassified.Bacteria_unclassified.Bacteria_unclassified.Otu1795                          | P | 2.367904 | 0.03557  |

|                                                                                                                           |   |          |          |
|---------------------------------------------------------------------------------------------------------------------------|---|----------|----------|
| Bacteria_unclassified.Bacteria_unclassified.Bacteria_unclassified.Bacteria_unclassified.Bacteria_unclassified.Otu2329     | P | 2.219242 | 0.03557  |
| Bacteria_unclassified.Bacteria_unclassified.Bacteria_unclassified.Bacteria_unclassified.Bacteria_unclassified.Otu2485     | P | 2.039143 | 0.002926 |
| Bacteria_unclassified.Bacteria_unclassified.Bacteria_unclassified.Bacteria_unclassified.Bacteria_unclassified.Otu2792     | P | 2.342697 | 0.03557  |
| Bacteria_unclassified.Bacteria_unclassified.Bacteria_unclassified.Bacteria_unclassified.Bacteria_unclassified.Otu3634     | P | 2.447809 | 0.03557  |
| Bacteria_unclassified.Bacteria_unclassified.Bacteria_unclassified.Bacteria_unclassified.Bacteria_unclassified.Otu4299     | P | 2.464403 | 0.03557  |
| Bacteria_unclassified.Bacteria_unclassified.Bacteria_unclassified.Bacteria_unclassified.Bacteria_unclassified.Otu4376     | P | 2.360415 | 0.03557  |
| Bacteria_unclassified.Bacteria_unclassified.Bacteria_unclassified.Bacteria_unclassified.Bacteria_unclassified.Otu4386     | P | 2.294965 | 0.03557  |
| Bacteria_unclassified.Bacteria_unclassified.Bacteria_unclassified.Bacteria_unclassified.Bacteria_unclassified.Otu4463     | P | 2.601463 | 0.03557  |
| Bacteria_unclassified.Bacteria_unclassified.Bacteria_unclassified.Bacteria_unclassified.Bacteria_unclassified.Otu4574     | P | 2.671895 | 0.03557  |
| Bacteria_unclassified.Bacteria_unclassified.Bacteria_unclassified.Bacteria_unclassified.Bacteria_unclassified.Otu4758     | P | 2.34986  | 0.03557  |
| Bacteria_unclassified.Bacteria_unclassified.Bacteria_unclassified.Bacteria_unclassified.Bacteria_unclassified.Otu5484     | P | 2.247399 | 0.03557  |
| Bacteria_unclassified.Bacteria_unclassified.Bacteria_unclassified.Bacteria_unclassified.Bacteria_unclassified.Otu5543     | P | 2.443859 | 0.03557  |
| Bacteria_unclassified.Bacteria_unclassified.Bacteria_unclassified.Bacteria_unclassified.Bacteria_unclassified.Otu5604     | P | 2.546545 | 0.03557  |
| Bacteria_unclassified.Bacteria_unclassified.Bacteria_unclassified.Bacteria_unclassified.Bacteria_unclassified.Otu5664     | P | 2.363285 | 0.03557  |
| Bacteria_unclassified.Bacteria_unclassified.Bacteria_unclassified.Bacteria_unclassified.Bacteria_unclassified.Otu5762     | P | 2.570991 | 0.03557  |
| Bacteria_unclassified.Bacteria_unclassified.Bacteria_unclassified.Bacteria_unclassified.Bacteria_unclassified.Otu6279     | P | 2.554252 | 0.03557  |
| Bacteria_unclassified.Bacteria_unclassified.Bacteria_unclassified.Bacteria_unclassified.Bacteria_unclassified.Otu7208     | P | 2.395096 | 0.03557  |
| Bacteroidetes                                                                                                             | N | 5.154918 | 1.04E-24 |
| Bacteroidetes.Bacteroidetes_unclassified                                                                                  | P | 2.478865 | 0.028463 |
| Bacteroidetes.Bacteroidetes_unclassified.Bacteroidetes_unclassified                                                       | P | 2.476008 | 0.028463 |
| Bacteroidetes.Bacteroidetes_unclassified.Bacteroidetes_unclassified.Bacteroidetes_unclassified                            | P | 2.482058 | 0.028463 |
| Bacteroidetes.Bacteroidetes_unclassified.Bacteroidetes_unclassified.Bacteroidetes_unclassified.Bacteroidetes_unclassified | P | 2.461326 | 0.028463 |
| Bacteroidetes.Bacteroidia                                                                                                 | N | 5.155169 | 5.01E-25 |
| Bacteroidetes.Bacteroidia.Bacteroidales                                                                                   | N | 5.155169 | 5.01E-25 |
| Bacteroidetes.Bacteroidia.Bacteroidales.Bacteroidaceae                                                                    | N | 4.951704 | 3.23E-18 |
| Bacteroidetes.Bacteroidia.Bacteroidales.Bacteroidaceae.Bacteroides                                                        | N | 4.951493 | 3.33E-18 |
| Bacteroidetes.Bacteroidia.Bacteroidales.Bacteroidaceae.Bacteroides.Otu0001                                                | N | 4.595841 | 5.49E-18 |
| Bacteroidetes.Bacteroidia.Bacteroidales.Bacteroidaceae.Bacteroides.Otu0005                                                | N | 3.775714 | 1.28E-08 |
| Bacteroidetes.Bacteroidia.Bacteroidales.Bacteroidaceae.Bacteroides.Otu0008                                                | N | 4.052277 | 1.46E-14 |
| Bacteroidetes.Bacteroidia.Bacteroidales.Bacteroidaceae.Bacteroides.Otu0010                                                | N | 4.074887 | 2.56E-15 |
| Bacteroidetes.Bacteroidia.Bacteroidales.Bacteroidaceae.Bacteroides.Otu0018                                                | N | 3.526821 | 4.52E-07 |
| Bacteroidetes.Bacteroidia.Bacteroidales.Bacteroidaceae.Bacteroides.Otu0030                                                | N | 3.52811  | 0.037097 |

|                                                                                               |   |          |          |
|-----------------------------------------------------------------------------------------------|---|----------|----------|
| Bacteroidetes.Bacteroidia.Bacteroidales.Bacteroidaceae.Bacteroides.Otu0040                    | N | 3.451412 | 0.000908 |
| Bacteroidetes.Bacteroidia.Bacteroidales.Bacteroidaceae.Bacteroides.Otu0117                    | N | 2.906467 | 2.36E-06 |
| Bacteroidetes.Bacteroidia.Bacteroidales.Bacteroidaceae.Bacteroides.Otu0158                    | N | 2.707035 | 4.39E-14 |
| Bacteroidetes.Bacteroidia.Bacteroidales.Bacteroidaceae.Bacteroides.Otu0174                    | N | 2.075563 | 0.034968 |
| Bacteroidetes.Bacteroidia.Bacteroidales.Bacteroidaceae.Bacteroides.Otu0201                    | N | 2.470593 | 1.76E-14 |
| Bacteroidetes.Bacteroidia.Bacteroidales.Bacteroidaceae.Bacteroides.Otu0210                    | N | 2.479909 | 5.22E-09 |
| Bacteroidetes.Bacteroidia.Bacteroidales.Bacteroidaceae.Bacteroides.Otu0211                    | N | 2.522394 | 6.73E-12 |
| Bacteroidetes.Bacteroidia.Bacteroidales.Bacteroidaceae.Bacteroides.Otu0214                    | N | 2.471883 | 2.12E-11 |
| Bacteroidetes.Bacteroidia.Bacteroidales.Bacteroidaceae.Bacteroides.Otu0242                    | N | 2.411184 | 5.35E-10 |
| Bacteroidetes.Bacteroidia.Bacteroidales.Bacteroidaceae.Bacteroides.Otu0243                    | N | 2.458776 | 3.62E-11 |
| Bacteroidetes.Bacteroidia.Bacteroidales.Bacteroidaceae.Bacteroides.Otu0256                    | N | 2.092533 | 1.77E-05 |
| Bacteroidetes.Bacteroidia.Bacteroidales.Bacteroidaceae.Bacteroides.Otu0300                    | N | 2.180988 | 4.76E-09 |
| Bacteroidetes.Bacteroidia.Bacteroidales.Bacteroidaceae.Bacteroides.Otu0322                    | N | 2.11298  | 0.016805 |
| Bacteroidetes.Bacteroidia.Bacteroidales.Bacteroidaceae.Bacteroides.Otu0842                    | P | 2.149051 | 0.002926 |
| Bacteroidetes.Bacteroidia.Bacteroidales.Bacteroidaceae.Bacteroides.Otu2078                    | P | 2.293925 | 0.03557  |
| Bacteroidetes.Bacteroidia.Bacteroidales.Bacteroidaceae.Bacteroides.Otu3650                    | P | 2.545211 | 0.03557  |
| Bacteroidetes.Bacteroidia.Bacteroidales.Bacteroidaceae.Bacteroides.Otu3827                    | P | 2.413151 | 0.03557  |
| Bacteroidetes.Bacteroidia.Bacteroidales.Bacteroidaceae.Bacteroides.Otu3861                    | P | 2.709121 | 0.03557  |
| Bacteroidetes.Bacteroidia.Bacteroidales.Bacteroidaceae.Bacteroides.Otu4411                    | P | 2.442309 | 0.03557  |
| Bacteroidetes.Bacteroidia.Bacteroidales.Bacteroidaceae.Bacteroides.Otu5502                    | P | 2.532006 | 0.03557  |
| Bacteroidetes.Bacteroidia.Bacteroidales.Bacteroidaceae.Bacteroides.Otu5617                    | P | 2.319978 | 0.03557  |
| Bacteroidetes.Bacteroidia.Bacteroidales.Bacteroidaceae.Bacteroides.Otu5815                    | P | 2.476438 | 0.03557  |
| Bacteroidetes.Bacteroidia.Bacteroidales.Bacteroidaceae.Bacteroides.Otu6073                    | P | 2.047387 | 0.03557  |
| Bacteroidetes.Bacteroidia.Bacteroidales.Bacteroidaceae.Bacteroides.Otu6394                    | P | 2.50909  | 0.03557  |
| Bacteroidetes.Bacteroidia.Bacteroidales.Bacteroidaceae.Bacteroides.Otu6650                    | P | 2.640489 | 0.03557  |
| Bacteroidetes.Bacteroidia.Bacteroidales.Bacteroidaceae.Bacteroides.Otu6827                    | P | 2.497068 | 0.03557  |
| Bacteroidetes.Bacteroidia.Bacteroidales.Bacteroidaceae.Bacteroides.Otu7226                    | P | 2.306923 | 0.03557  |
| Bacteroidetes.Bacteroidia.Bacteroidales.Bacteroidaceae.Bacteroides.Otu7322                    | P | 2.564876 | 0.03557  |
| Bacteroidetes.Bacteroidia.Bacteroidales.Bacteroidales_unclassified                            | N | 2.52076  | 4.78E-08 |
| Bacteroidetes.Bacteroidia.Bacteroidales.Bacteroidales_unclassified.Bacteroidales_unclassified | N | 2.519357 | 4.78E-08 |
| Bacteroidetes.Bacteroidia.Bacteroidales.Porphyromonadaceae                                    | N | 4.226732 | 3.47E-14 |
| Bacteroidetes.Bacteroidia.Bacteroidales.Porphyromonadaceae.Barnesiella                        | N | 3.643141 | 4.83E-08 |

|                                                                                                    |   |          |          |
|----------------------------------------------------------------------------------------------------|---|----------|----------|
| Bacteroidetes.Bacteroidia.Bacteroidales.Porphyromonadaceae.Barnesiella.Otu0047                     | N | 3.259838 | 0.000164 |
| Bacteroidetes.Bacteroidia.Bacteroidales.Porphyromonadaceae.Barnesiella.Otu0080                     | N | 3.186307 | 0.018283 |
| Bacteroidetes.Bacteroidia.Bacteroidales.Porphyromonadaceae.Barnesiella.Otu0381                     | N | 2.152433 | 0.018033 |
| Bacteroidetes.Bacteroidia.Bacteroidales.Porphyromonadaceae.Barnesiella.Otu4363                     | P | 2.186907 | 0.03557  |
| Bacteroidetes.Bacteroidia.Bacteroidales.Porphyromonadaceae.Butyricimonas                           | N | 3.164535 | 3.73E-06 |
| Bacteroidetes.Bacteroidia.Bacteroidales.Porphyromonadaceae.Butyricimonas.Otu0070                   | N | 3.112303 | 9.48E-07 |
| Bacteroidetes.Bacteroidia.Bacteroidales.Porphyromonadaceae.Butyricimonas.Otu6232                   | P | 2.378024 | 0.03557  |
| Bacteroidetes.Bacteroidia.Bacteroidales.Porphyromonadaceae.Dysgonomonas.Otu3108                    | P | 2.426136 | 0.03557  |
| Bacteroidetes.Bacteroidia.Bacteroidales.Porphyromonadaceae.Dysgonomonas.Otu3809                    | P | 2.545765 | 0.03557  |
| Bacteroidetes.Bacteroidia.Bacteroidales.Porphyromonadaceae.Dysgonomonas.Otu4339                    | P | 2.552855 | 0.03557  |
| Bacteroidetes.Bacteroidia.Bacteroidales.Porphyromonadaceae.Odoribacter                             | N | 3.40448  | 3.16E-10 |
| Bacteroidetes.Bacteroidia.Bacteroidales.Porphyromonadaceae.Odoribacter.Otu0043                     | N | 3.32795  | 6.02E-11 |
| Bacteroidetes.Bacteroidia.Bacteroidales.Porphyromonadaceae.Odoribacter.Otu7078                     | P | 2.62244  | 0.03557  |
| Bacteroidetes.Bacteroidia.Bacteroidales.Porphyromonadaceae.Paludibacter                            | P | 2.148963 | 0.03557  |
| Bacteroidetes.Bacteroidia.Bacteroidales.Porphyromonadaceae.Paludibacter.Otu4473                    | P | 2.575393 | 0.03557  |
| Bacteroidetes.Bacteroidia.Bacteroidales.Porphyromonadaceae.Parabacteroides                         | N | 3.837384 | 3.04E-11 |
| Bacteroidetes.Bacteroidia.Bacteroidales.Porphyromonadaceae.Parabacteroides.Otu0019                 | N | 3.447834 | 6.12E-09 |
| Bacteroidetes.Bacteroidia.Bacteroidales.Porphyromonadaceae.Parabacteroides.Otu0022                 | N | 3.53338  | 4.72E-06 |
| Bacteroidetes.Bacteroidia.Bacteroidales.Porphyromonadaceae.Porphyromonadaceae_unclassified         | N | 3.215596 | 7.41E-05 |
| Bacteroidetes.Bacteroidia.Bacteroidales.Porphyromonadaceae.Porphyromonadaceae_unclassified.Otu0150 | N | 2.648908 | 0.001201 |
| Bacteroidetes.Bacteroidia.Bacteroidales.Porphyromonadaceae.Porphyromonadaceae_unclassified.Otu4893 | P | 2.773561 | 0.03557  |
| Bacteroidetes.Bacteroidia.Bacteroidales.Porphyromonadaceae.Porphyromonadaceae_unclassified.Otu5010 | P | 2.598425 | 0.03557  |
| Bacteroidetes.Bacteroidia.Bacteroidales.Porphyromonadaceae.Porphyromonas.Otu2855                   | P | 2.185536 | 0.03557  |
| Bacteroidetes.Bacteroidia.Bacteroidales.Porphyromonadaceae.Porphyromonas.Otu3418                   | P | 2.22589  | 0.03557  |
| Bacteroidetes.Bacteroidia.Bacteroidales.Porphyromonadaceae.Porphyromonas.Otu4069                   | P | 2.346155 | 0.03557  |
| Bacteroidetes.Bacteroidia.Bacteroidales.Prevotellaceae.Alloprevotella.Otu5567                      | P | 2.501273 | 0.03557  |
| Bacteroidetes.Bacteroidia.Bacteroidales.Prevotellaceae.Alloprevotella.Otu6891                      | P | 2.247038 | 0.03557  |
| Bacteroidetes.Bacteroidia.Bacteroidales.Prevotellaceae.Paraprevotella.Otu0092                      | N | 3.029421 | 0.015661 |
| Bacteroidetes.Bacteroidia.Bacteroidales.Prevotellaceae.Prevotella.Otu0137                          | N | 2.444765 | 0.028273 |
| Bacteroidetes.Bacteroidia.Bacteroidales.Prevotellaceae.Prevotella.Otu3641                          | P | 2.72371  | 0.03557  |
| Bacteroidetes.Bacteroidia.Bacteroidales.Prevotellaceae.Prevotella.Otu4025                          | P | 2.186099 | 0.03557  |
| Bacteroidetes.Bacteroidia.Bacteroidales.Prevotellaceae.Prevotella.Otu4203                          | P | 2.5659   | 0.03557  |

|                                                                                                                                                                                                         |   |          |          |
|---------------------------------------------------------------------------------------------------------------------------------------------------------------------------------------------------------|---|----------|----------|
| Bacteroidetes.Bacteroidia.Bacteroidales.Prevotellaceae.Prevotella.Otu4451                                                                                                                               | P | 2.437731 | 0.03557  |
| Bacteroidetes.Bacteroidia.Bacteroidales.Rikenellaceae                                                                                                                                                   | N | 4.2018   | 7.28E-19 |
| Bacteroidetes.Bacteroidia.Bacteroidales.Rikenellaceae.Alistipes                                                                                                                                         | N | 4.196689 | 7.76E-19 |
| Bacteroidetes.Bacteroidia.Bacteroidales.Rikenellaceae.Alistipes.Otu0015                                                                                                                                 | N | 3.825156 | 7.55E-13 |
| Bacteroidetes.Bacteroidia.Bacteroidales.Rikenellaceae.Alistipes.Otu0025                                                                                                                                 | N | 3.69254  | 2.63E-09 |
| Bacteroidetes.Bacteroidia.Bacteroidales.Rikenellaceae.Alistipes.Otu0075                                                                                                                                 | N | 3.11218  | 8.05E-10 |
| Bacteroidetes.Bacteroidia.Bacteroidales.Rikenellaceae.Alistipes.Otu0189                                                                                                                                 | N | 2.353947 | 0.014062 |
| Bacteroidetes.Bacteroidia.Bacteroidales.Rikenellaceae.Alistipes.Otu0197                                                                                                                                 | N | 2.541874 | 2.7E-05  |
| Bacteroidetes.Bacteroidia.Bacteroidales.Rikenellaceae.Alistipes.Otu0237                                                                                                                                 | N | 2.736512 | 0.016289 |
| Bacteroidetes.Bacteroidia.Bacteroidales.Rikenellaceae.Alistipes.Otu0278                                                                                                                                 | N | 2.175896 | 0.046153 |
| Bacteroidetes.Bacteroidia.Bacteroidales.Rikenellaceae.Alistipes.Otu0289                                                                                                                                 | N | 2.169957 | 2.23E-05 |
| Bacteroidetes.Bacteroidia.Bacteroidales.Rikenellaceae.Alistipes.Otu0308                                                                                                                                 | N | 2.136461 | 8.61E-05 |
| Bacteroidetes.Bacteroidia.Bacteroidales.Rikenellaceae.Rikenellaceae_unclassified                                                                                                                        | N | 2.569783 | 0.037714 |
| Bacteroidetes.Bacteroidia.Bacteroidales.Rikenellaceae.Rikenellaceae_unclassified.Otu0192                                                                                                                | N | 2.57098  | 0.041639 |
| Bacteroidetes.Cytophagia                                                                                                                                                                                | P | 2.190256 | 0.03557  |
| Bacteroidetes.Cytophagia.Cytophagales                                                                                                                                                                   | P | 2.315359 | 0.03557  |
| Bacteroidetes.Cytophagia.Cytophagales.Cytophagaceae                                                                                                                                                     | P | 2.543009 | 0.03557  |
| Bacteroidetes.Cytophagia.Cytophagales.Cytophagaceae.Dyadobacter                                                                                                                                         | P | 2.229669 | 0.03557  |
| Bacteroidetes.Cytophagia.Cytophagales.Cytophagaceae.Dyadobacter.Otu6477                                                                                                                                 | P | 2.48076  | 0.03557  |
| Bacteroidetes.Flavobacteriia                                                                                                                                                                            | P | 2.142346 | 4.76E-08 |
| Bacteroidetes.Flavobacteriia.Flavobacteriales                                                                                                                                                           | P | 2.139798 | 4.76E-08 |
| Bacteroidetes.Flavobacteriia.Flavobacteriales.Flavobacteriaceae                                                                                                                                         | P | 2.122931 | 4.76E-08 |
| Bacteroidetes.Flavobacteriia.Flavobacteriales.Flavobacteriaceae.Capnocytophaga.Otu1633                                                                                                                  | P | 2.416672 | 0.03557  |
| Bacteroidetes.Flavobacteriia.Flavobacteriales.Flavobacteriaceae.Chryseobacterium.Otu2583                                                                                                                | P | 2.634684 | 0.03557  |
| Bacteroidetes.Flavobacteriia.Flavobacteriales.Flavobacteriaceae.Chryseobacterium.Otu6614                                                                                                                | P | 2.331824 | 0.03557  |
| Bacteroidetes.Flavobacteriia.Flavobacteriales.Flavobacteriaceae.Elizabethkingia                                                                                                                         | P | 2.479863 | 0.03557  |
| Bacteroidetes.Flavobacteriia.Flavobacteriales.Flavobacteriaceae.Elizabethkingia.Otu4881                                                                                                                 | P | 2.759111 | 0.03557  |
| Bacteroidetes.Flavobacteriia.Flavobacteriales.Flavobacteriaceae.Wautersiella                                                                                                                            | P | 2.034767 | 0.03557  |
| Bacteroidetes.Flavobacteriia.Flavobacteriales.Flavobacteriaceae.Wautersiella.Otu5019                                                                                                                    | P | 2.472909 | 0.03557  |
| Bacteroidetes.Sphingobacteriia.Sphingobacteriales.Sphingobacteriaceae.Pedobacter.Otu2389                                                                                                                | P | 2.208569 | 0.03557  |
| Candidatus_Saccharibacteria.Candidatus_Saccharibacteria_unclassified.Candidatus_Saccharibacteria_unclassified.Candidatus_Saccharibacteria_unclassified.Candidatus_Saccharibacteria_unclassified.Otu6620 | P | 2.220186 | 0.03557  |

|                                                                                           |   |          |          |
|-------------------------------------------------------------------------------------------|---|----------|----------|
| Deinococcus_Thermus                                                                       | P | 2.507687 | 0.03557  |
| Deinococcus_Thermus.Deinococci                                                            | P | 2.463411 | 0.03557  |
| Deinococcus_Thermus.Deinococci.Deinococcales                                              | P | 2.411899 | 0.03557  |
| Deinococcus_Thermus.Deinococci.Deinococcales.Deinococcaceae                               | P | 2.466983 | 0.03557  |
| Deinococcus_Thermus.Deinococci.Deinococcales.Deinococcaceae.Deinococcus                   | P | 2.338567 | 0.03557  |
| Deinococcus_Thermus.Deinococci.Deinococcales.Deinococcaceae.Deinococcus.Otu3834           | P | 2.380863 | 0.03557  |
| Firmicutes                                                                                | N | 4.90129  | 3.9E-11  |
| Firmicutes.Bacilli                                                                        | P | 4.591413 | 3.53E-16 |
| Firmicutes.Bacilli.Bacillales                                                             | P | 3.310666 | 1.41E-11 |
| Firmicutes.Bacilli.Bacillales.Bacillales_Incertae_Sedis_XI                                | P | 3.303465 | 6.52E-10 |
| Firmicutes.Bacilli.Bacillales.Bacillales_Incertae_Sedis_XI.Gemella                        | P | 3.303278 | 6.52E-10 |
| Firmicutes.Bacilli.Bacillales.Bacillales_Incertae_Sedis_XI.Gemella.Otu0205                | P | 3.304242 | 9.15E-09 |
| Firmicutes.Bacilli.Bacillales.Bacillales_Incertae_Sedis_XI.Gemella.Otu4519                | P | 2.57082  | 0.03557  |
| Firmicutes.Bacilli.Bacillales.Bacillales_unclassified.Bacillales_unclassified.Otu2650     | P | 2.217784 | 0.03557  |
| Firmicutes.Bacilli.Bacillales.Bacillales_unclassified.Bacillales_unclassified.Otu4468     | P | 2.228675 | 0.03557  |
| Firmicutes.Bacilli.Bacillales.Bacillales_unclassified.Bacillales_unclassified.Otu5063     | P | 2.4738   | 0.03557  |
| Firmicutes.Bacilli.Bacillales.Paenibacillaceae_1.Paenibacillus.Otu2032                    | P | 2.716555 | 0.03557  |
| Firmicutes.Bacilli.Bacillales.Paenibacillaceae_1.Paenibacillus.Otu2911                    | P | 2.183247 | 0.03557  |
| Firmicutes.Bacilli.Bacillales.Paenibacillaceae_1.Paenibacillus.Otu6069                    | P | 2.536552 | 0.03557  |
| Firmicutes.Bacilli.Bacillales.Planococcaceae                                              | P | 2.585214 | 0.03557  |
| Firmicutes.Bacilli.Bacillales.Planococcaceae.Planococcaceae_unclassified                  | P | 2.140699 | 0.03557  |
| Firmicutes.Bacilli.Bacillales.Planococcaceae.Planococcaceae_unclassified.Otu6612          | P | 2.208758 | 0.03557  |
| Firmicutes.Bacilli.Bacillales.Staphylococcaceae                                           | N | 2.966184 | 1.54E-05 |
| Firmicutes.Bacilli.Bacillales.Staphylococcaceae.Staphylococcus                            | N | 2.991895 | 9.56E-06 |
| Firmicutes.Bacilli.Bacillales.Staphylococcaceae.Staphylococcus.Otu0071                    | N | 3.001252 | 7.91E-06 |
| Firmicutes.Bacilli.Bacilli_unclassified.Bacilli_unclassified.Bacilli_unclassified.Otu5891 | P | 2.398872 | 0.03557  |
| Firmicutes.Bacilli.Bacilli_unclassified.Bacilli_unclassified.Bacilli_unclassified.Otu6338 | P | 2.075307 | 0.03557  |
| Firmicutes.Bacilli.Lactobacillales                                                        | P | 4.569979 | 1.84E-15 |
| Firmicutes.Bacilli.Lactobacillales.Aerococcaceae                                          | P | 2.68836  | 0.001361 |
| Firmicutes.Bacilli.Lactobacillales.Aerococcaceae.Abiotrophia                              | P | 2.715936 | 0.00107  |
| Firmicutes.Bacilli.Lactobacillales.Aerococcaceae.Abiotrophia.Otu0171                      | P | 2.653948 | 0.00107  |
| Firmicutes.Bacilli.Lactobacillales.Aerococcaceae.Facklamia                                | P | 2.356411 | 0.03557  |

|                                                                                             |   |          |          |
|---------------------------------------------------------------------------------------------|---|----------|----------|
| Firmicutes.Bacilli.Lactobacillales.Aerococcaceae.Facklamia.Otu6756                          | P | 2.26824  | 0.03557  |
| Firmicutes.Bacilli.Lactobacillales.Carnobacteriaceae                                        | P | 3.098486 | 6.65E-07 |
| Firmicutes.Bacilli.Lactobacillales.Carnobacteriaceae.Carnobacteriaceae_unclassified.Otu3857 | P | 2.34924  | 0.03557  |
| Firmicutes.Bacilli.Lactobacillales.Carnobacteriaceae.Carnobacteriaceae_unclassified.Otu4706 | P | 2.278495 | 0.03557  |
| Firmicutes.Bacilli.Lactobacillales.Carnobacteriaceae.Carnobacteriaceae_unclassified.Otu5346 | P | 2.219158 | 0.03557  |
| Firmicutes.Bacilli.Lactobacillales.Carnobacteriaceae.Carnobacteriaceae_unclassified.Otu6388 | P | 2.411851 | 0.03557  |
| Firmicutes.Bacilli.Lactobacillales.Carnobacteriaceae.Granulicatella                         | P | 3.094914 | 8.95E-07 |
| Firmicutes.Bacilli.Lactobacillales.Carnobacteriaceae.Granulicatella.Otu0065                 | P | 3.050196 | 5.51E-06 |
| Firmicutes.Bacilli.Lactobacillales.Carnobacteriaceae.Granulicatella.Otu0465                 | P | 2.181621 | 0.000289 |
| Firmicutes.Bacilli.Lactobacillales.Carnobacteriaceae.Granulicatella.Otu3555                 | P | 2.233088 | 0.002926 |
| Firmicutes.Bacilli.Lactobacillales.Carnobacteriaceae.Granulicatella.Otu5663                 | P | 2.312998 | 0.03557  |
| Firmicutes.Bacilli.Lactobacillales.Carnobacteriaceae.Granulicatella.Otu7230                 | P | 2.525407 | 0.03557  |
| Firmicutes.Bacilli.Lactobacillales.Enterococcaceae                                          | P | 3.822466 | 9.54E-10 |
| Firmicutes.Bacilli.Lactobacillales.Enterococcaceae.Enterococcaceae_unclassified             | P | 2.02286  | 1.56E-08 |
| Firmicutes.Bacilli.Lactobacillales.Enterococcaceae.Enterococcus                             | P | 3.817141 | 2.47E-09 |
| Firmicutes.Bacilli.Lactobacillales.Enterococcaceae.Enterococcus.Otu0009                     | P | 3.816529 | 1.9E-09  |
| Firmicutes.Bacilli.Lactobacillales.Enterococcaceae.Enterococcus.Otu3778                     | P | 2.274381 | 0.002926 |
| Firmicutes.Bacilli.Lactobacillales.Enterococcaceae.Enterococcus.Otu5768                     | P | 2.374369 | 0.03557  |
| Firmicutes.Bacilli.Lactobacillales.Enterococcaceae.Enterococcus.Otu6117                     | P | 2.255227 | 0.03557  |
| Firmicutes.Bacilli.Lactobacillales.Lactobacillaceae                                         | P | 3.653504 | 0.001854 |
| Firmicutes.Bacilli.Lactobacillales.Lactobacillaceae.Lactobacillaceae_unclassified.Otu2955   | P | 2.574822 | 0.002926 |
| Firmicutes.Bacilli.Lactobacillales.Lactobacillaceae.Lactobacillaceae_unclassified.Otu3090   | P | 2.315695 | 0.03557  |
| Firmicutes.Bacilli.Lactobacillales.Lactobacillaceae.Lactobacillaceae_unclassified.Otu6975   | P | 2.493452 | 0.03557  |
| Firmicutes.Bacilli.Lactobacillales.Lactobacillaceae.Lactobacillus                           | P | 3.647765 | 0.001559 |
| Firmicutes.Bacilli.Lactobacillales.Lactobacillaceae.Lactobacillus.Otu0140                   | P | 3.064074 | 0.003407 |
| Firmicutes.Bacilli.Lactobacillales.Lactobacillaceae.Lactobacillus.Otu0234                   | P | 2.765007 | 0.008071 |
| Firmicutes.Bacilli.Lactobacillales.Lactobacillaceae.Lactobacillus.Otu0554                   | P | 2.458851 | 0.002926 |
| Firmicutes.Bacilli.Lactobacillales.Lactobacillaceae.Lactobacillus.Otu2052                   | P | 2.190196 | 0.002926 |
| Firmicutes.Bacilli.Lactobacillales.Lactobacillaceae.Lactobacillus.Otu2077                   | P | 2.16049  | 0.002926 |
| Firmicutes.Bacilli.Lactobacillales.Lactobacillaceae.Lactobacillus.Otu2346                   | P | 2.518956 | 0.03557  |
| Firmicutes.Bacilli.Lactobacillales.Lactobacillaceae.Lactobacillus.Otu2507                   | P | 2.537502 | 0.002926 |
| Firmicutes.Bacilli.Lactobacillales.Lactobacillaceae.Lactobacillus.Otu3124                   | P | 2.515643 | 0.03557  |

|                                                                                                      |   |          |          |
|------------------------------------------------------------------------------------------------------|---|----------|----------|
| Firmicutes.Bacilli.Lactobacillales.Lactobacillaceae.Lactobacillus.Otu3223                            | P | 2.47049  | 0.03557  |
| Firmicutes.Bacilli.Lactobacillales.Lactobacillaceae.Lactobacillus.Otu3402                            | P | 2.641229 | 0.03557  |
| Firmicutes.Bacilli.Lactobacillales.Lactobacillaceae.Lactobacillus.Otu3709                            | P | 2.555341 | 0.03557  |
| Firmicutes.Bacilli.Lactobacillales.Lactobacillaceae.Lactobacillus.Otu3806                            | P | 2.497028 | 0.03557  |
| Firmicutes.Bacilli.Lactobacillales.Lactobacillaceae.Lactobacillus.Otu3985                            | P | 2.414209 | 0.002926 |
| Firmicutes.Bacilli.Lactobacillales.Lactobacillaceae.Lactobacillus.Otu4418                            | P | 2.228386 | 0.002926 |
| Firmicutes.Bacilli.Lactobacillales.Lactobacillaceae.Lactobacillus.Otu4543                            | P | 2.617563 | 0.03557  |
| Firmicutes.Bacilli.Lactobacillales.Lactobacillaceae.Lactobacillus.Otu4783                            | P | 2.234484 | 0.03557  |
| Firmicutes.Bacilli.Lactobacillales.Lactobacillaceae.Lactobacillus.Otu4955                            | P | 2.572039 | 0.03557  |
| Firmicutes.Bacilli.Lactobacillales.Lactobacillaceae.Lactobacillus.Otu5302                            | P | 2.506517 | 0.03557  |
| Firmicutes.Bacilli.Lactobacillales.Lactobacillaceae.Lactobacillus.Otu5812                            | P | 2.584261 | 0.03557  |
| Firmicutes.Bacilli.Lactobacillales.Lactobacillaceae.Lactobacillus.Otu5847                            | P | 2.419361 | 0.03557  |
| Firmicutes.Bacilli.Lactobacillales.Lactobacillaceae.Lactobacillus.Otu5853                            | P | 2.475718 | 0.03557  |
| Firmicutes.Bacilli.Lactobacillales.Lactobacillaceae.Lactobacillus.Otu6042                            | P | 2.370056 | 0.03557  |
| Firmicutes.Bacilli.Lactobacillales.Lactobacillaceae.Lactobacillus.Otu6063                            | P | 2.310771 | 0.03557  |
| Firmicutes.Bacilli.Lactobacillales.Lactobacillaceae.Lactobacillus.Otu6083                            | P | 2.465124 | 0.03557  |
| Firmicutes.Bacilli.Lactobacillales.Lactobacillales_unclassified.Lactobacillales_unclassified.Otu3456 | P | 2.439411 | 0.002926 |
| Firmicutes.Bacilli.Lactobacillales.Lactobacillales_unclassified.Lactobacillales_unclassified.Otu3486 | P | 2.341646 | 0.03557  |
| Firmicutes.Bacilli.Lactobacillales.Lactobacillales_unclassified.Lactobacillales_unclassified.Otu4110 | P | 2.665203 | 0.03557  |
| Firmicutes.Bacilli.Lactobacillales.Lactobacillales_unclassified.Lactobacillales_unclassified.Otu4394 | P | 2.741041 | 0.03557  |
| Firmicutes.Bacilli.Lactobacillales.Lactobacillales_unclassified.Lactobacillales_unclassified.Otu4401 | P | 2.356607 | 0.03557  |
| Firmicutes.Bacilli.Lactobacillales.Lactobacillales_unclassified.Lactobacillales_unclassified.Otu4408 | P | 2.51447  | 0.03557  |
| Firmicutes.Bacilli.Lactobacillales.Lactobacillales_unclassified.Lactobacillales_unclassified.Otu4426 | P | 2.232644 | 0.03557  |
| Firmicutes.Bacilli.Lactobacillales.Lactobacillales_unclassified.Lactobacillales_unclassified.Otu4659 | P | 2.294812 | 0.03557  |
| Firmicutes.Bacilli.Lactobacillales.Lactobacillales_unclassified.Lactobacillales_unclassified.Otu6691 | P | 2.776496 | 0.03557  |
| Firmicutes.Bacilli.Lactobacillales.Lactobacillales_unclassified.Lactobacillales_unclassified.Otu7041 | P | 2.354363 | 0.03557  |
| Firmicutes.Bacilli.Lactobacillales.Leuconostocaceae.Weissella.Otu5629                                | P | 2.644177 | 0.03557  |
| Firmicutes.Bacilli.Lactobacillales.Leuconostocaceae.Weissella.Otu6049                                | P | 2.623089 | 0.03557  |
| Firmicutes.Bacilli.Lactobacillales.Leuconostocaceae.Weissella.Otu6892                                | P | 2.691752 | 0.03557  |
| Firmicutes.Bacilli.Lactobacillales.Leuconostocaceae.Weissella.Otu6968                                | P | 2.427023 | 0.03557  |
| Firmicutes.Bacilli.Lactobacillales.Streptococcaceae                                                  | P | 4.380059 | 1.79E-11 |
| Firmicutes.Bacilli.Lactobacillales.Streptococcaceae.Lactococcus                                      | P | 2.456788 | 0.004007 |



|                                                                                                       |   |          |          |
|-------------------------------------------------------------------------------------------------------|---|----------|----------|
| Firmicutes.Bacilli.Lactobacillales.Streptococcaceae.Lactococcus.Otu0282                               | P | 2.36071  | 0.001874 |
| Firmicutes.Bacilli.Lactobacillales.Streptococcaceae.Lactococcus.Otu6430                               | P | 2.558133 | 0.03557  |
| Firmicutes.Bacilli.Lactobacillales.Streptococcaceae.Streptococcus                                     | P | 4.375313 | 2.48E-11 |
| Firmicutes.Bacilli.Lactobacillales.Streptococcaceae.Streptococcus.Otu0023                             | P | 3.835113 | 5.8E-12  |
| Firmicutes.Bacilli.Lactobacillales.Streptococcaceae.Streptococcus.Otu0036                             | P | 3.821664 | 8.62E-05 |
| Firmicutes.Bacilli.Lactobacillales.Streptococcaceae.Streptococcus.Otu0041                             | P | 3.01189  | 0.000229 |
| Firmicutes.Bacilli.Lactobacillales.Streptococcaceae.Streptococcus.Otu0241                             | P | 2.104167 | 0.013116 |
| Firmicutes.Bacilli.Lactobacillales.Streptococcaceae.Streptococcus.Otu0405                             | P | 2.218765 | 0.002202 |
| Firmicutes.Bacilli.Lactobacillales.Streptococcaceae.Streptococcus.Otu1699                             | P | 2.282841 | 0.002926 |
| Firmicutes.Bacilli.Lactobacillales.Streptococcaceae.Streptococcus.Otu3306                             | P | 2.338579 | 0.03557  |
| Firmicutes.Bacilli.Lactobacillales.Streptococcaceae.Streptococcus.Otu3364                             | P | 2.407414 | 0.03557  |
| Firmicutes.Bacilli.Lactobacillales.Streptococcaceae.Streptococcus.Otu3605                             | P | 2.11557  | 0.002926 |
| Firmicutes.Bacilli.Lactobacillales.Streptococcaceae.Streptococcus.Otu3786                             | P | 2.33567  | 0.03557  |
| Firmicutes.Bacilli.Lactobacillales.Streptococcaceae.Streptococcus.Otu3848                             | P | 2.412641 | 0.03557  |
| Firmicutes.Bacilli.Lactobacillales.Streptococcaceae.Streptococcus.Otu4102                             | P | 2.647784 | 0.03557  |
| Firmicutes.Bacilli.Lactobacillales.Streptococcaceae.Streptococcus.Otu4797                             | P | 2.054663 | 0.03557  |
| Firmicutes.Bacilli.Lactobacillales.Streptococcaceae.Streptococcus.Otu4880                             | P | 2.227093 | 0.03557  |
| Firmicutes.Bacilli.Lactobacillales.Streptococcaceae.Streptococcus.Otu4903                             | P | 2.367804 | 0.03557  |
| Firmicutes.Bacilli.Lactobacillales.Streptococcaceae.Streptococcus.Otu5713                             | P | 2.183793 | 0.03557  |
| Firmicutes.Bacilli.Lactobacillales.Streptococcaceae.Streptococcus.Otu5843                             | P | 2.556655 | 0.03557  |
| Firmicutes.Bacilli.Lactobacillales.Streptococcaceae.Streptococcus.Otu6206                             | P | 2.50191  | 0.03557  |
| Firmicutes.Bacilli.Lactobacillales.Streptococcaceae.Streptococcus.Otu6874                             | P | 2.484447 | 0.03557  |
| Firmicutes.Bacilli.Lactobacillales.Streptococcaceae.Streptococcus.Otu6977                             | P | 2.412641 | 0.03557  |
| Firmicutes.Bacilli.Lactobacillales.Streptococcaceae.Streptococcus.Otu7286                             | P | 2.505688 | 0.03557  |
| Firmicutes.Clostridia                                                                                 | N | 5.012388 | 9.5E-24  |
| Firmicutes.Clostridia.Clostridia_unclassified                                                         | N | 2.078326 | 0.005758 |
| Firmicutes.Clostridia.Clostridia_unclassified.Clostridia_unclassified                                 | N | 2.112451 | 0.005758 |
| Firmicutes.Clostridia.Clostridia_unclassified.Clostridia_unclassified.Clostridia_unclassified         | N | 2.12958  | 0.005758 |
| Firmicutes.Clostridia.Clostridia_unclassified.Clostridia_unclassified.Clostridia_unclassified.Otu5360 | P | 2.112341 | 0.03557  |
| Firmicutes.Clostridia.Clostridiales                                                                   | N | 5.011841 | 9.82E-24 |
| Firmicutes.Clostridia.Clostridiales.Clostridiaceae_1                                                  | P | 3.75565  | 0.015091 |
| Firmicutes.Clostridia.Clostridiales.Clostridiaceae_1.Anaerospobacter.Otu5974                          | P | 2.574851 | 0.03557  |

|                                                                                                                      |   |          |          |
|----------------------------------------------------------------------------------------------------------------------|---|----------|----------|
| Firmicutes.Clostridia.Clostridiales.Clostridiaceae_1.Clostridiaceae_1_unclassified                                   | N | 2.800774 | 0.004493 |
| Firmicutes.Clostridia.Clostridiales.Clostridiaceae_1.Clostridiaceae_1_unclassified.Otu3933                           | P | 2.370285 | 0.03557  |
| Firmicutes.Clostridia.Clostridiales.Clostridiaceae_1.Clostridiaceae_1_unclassified.Otu4741                           | P | 2.164347 | 0.03557  |
| Firmicutes.Clostridia.Clostridiales.Clostridiaceae_1.Clostridiaceae_1_unclassified.Otu5098                           | P | 2.627598 | 0.03557  |
| Firmicutes.Clostridia.Clostridiales.Clostridiaceae_1.Clostridiaceae_1_unclassified.Otu5145                           | P | 2.585374 | 0.03557  |
| Firmicutes.Clostridia.Clostridiales.Clostridiaceae_1.Clostridiaceae_1_unclassified.Otu6108                           | P | 2.531976 | 0.03557  |
| Firmicutes.Clostridia.Clostridiales.Clostridiaceae_1.Clostridiaceae_1_unclassified.Otu6643                           | P | 2.221352 | 0.03557  |
| Firmicutes.Clostridia.Clostridiales.Clostridiaceae_1.Clostridiaceae_1_unclassified.Otu7219                           | P | 2.609005 | 0.03557  |
| Firmicutes.Clostridia.Clostridiales.Clostridiaceae_1.Clostridiaceae_1_unclassified.Otu7268                           | P | 2.412568 | 0.03557  |
| Firmicutes.Clostridia.Clostridiales.Clostridiaceae_1.Clostridium_sensu_stricto                                       | P | 3.805337 | 0.045047 |
| Firmicutes.Clostridia.Clostridiales.Clostridiaceae_1.Clostridium_sensu_stricto.Otu0087                               | N | 2.606977 | 0.002455 |
| Firmicutes.Clostridia.Clostridiales.Clostridiaceae_1.Clostridium_sensu_stricto.Otu0304                               | N | 2.162546 | 0.001885 |
| Firmicutes.Clostridia.Clostridiales.Clostridiaceae_1.Clostridium_sensu_stricto.Otu3259                               | P | 2.379289 | 0.03557  |
| Firmicutes.Clostridia.Clostridiales.Clostridiaceae_1.Clostridium_sensu_stricto.Otu3800                               | P | 2.751606 | 0.03557  |
| Firmicutes.Clostridia.Clostridiales.Clostridiaceae_1.Clostridium_sensu_stricto.Otu4350                               | P | 2.58051  | 0.03557  |
| Firmicutes.Clostridia.Clostridiales.Clostridiaceae_1.Clostridium_sensu_stricto.Otu5731                               | P | 2.58651  | 0.03557  |
| Firmicutes.Clostridia.Clostridiales.Clostridiaceae_1.Clostridium_sensu_stricto.Otu6637                               | P | 2.419227 | 0.03557  |
| Firmicutes.Clostridia.Clostridiales.Clostridiaceae_1.Sarcina                                                         | N | 2.207651 | 0.025861 |
| Firmicutes.Clostridia.Clostridiales.Clostridiaceae_1.Sarcina.Otu0267                                                 | N | 2.189007 | 0.025861 |
| Firmicutes.Clostridia.Clostridiales.Clostridiales_Incertae_Sedis_XI                                                  | P | 2.414147 | 0.003819 |
| Firmicutes.Clostridia.Clostridiales.Clostridiales_Incertae_Sedis_XI.Parvimonas.Otu3096                               | P | 2.331678 | 0.03557  |
| Firmicutes.Clostridia.Clostridiales.Clostridiales_Incertae_Sedis_XI.Parvimonas.Otu6133                               | P | 2.621473 | 0.03557  |
| Firmicutes.Clostridia.Clostridiales.Clostridiales_Incertae_Sedis_XI.Parvimonas.Otu6550                               | P | 2.291493 | 0.03557  |
| Firmicutes.Clostridia.Clostridiales.Clostridiales_Incertae_Sedis_XI.Peptoniphilus.Otu4479                            | P | 2.409788 | 0.03557  |
| Firmicutes.Clostridia.Clostridiales.Clostridiales_Incertae_Sedis_XIII                                                | N | 2.088899 | 0.006143 |
| Firmicutes.Clostridia.Clostridiales.Clostridiales_Incertae_Sedis_XIII.Anaerovorax.Otu5385                            | P | 2.422925 | 0.03557  |
| Firmicutes.Clostridia.Clostridiales.Clostridiales_Incertae_Sedis_XIII.Clostridiales_Incertae_Sedis_XIII_unclassified | N | 2.045885 | 3.59E-05 |
| Firmicutes.Clostridia.Clostridiales.Clostridiales_unclassified                                                       | N | 3.752017 | 4.88E-14 |
| Firmicutes.Clostridia.Clostridiales.Clostridiales_unclassified.Clostridiales_unclassified                            | N | 3.752017 | 4.88E-14 |
| Firmicutes.Clostridia.Clostridiales.Clostridiales_unclassified.Clostridiales_unclassified.Otu0099                    | N | 2.867714 | 9.53E-06 |
| Firmicutes.Clostridia.Clostridiales.Clostridiales_unclassified.Clostridiales_unclassified.Otu0155                    | N | 2.655109 | 0.00368  |
| Firmicutes.Clostridia.Clostridiales.Clostridiales_unclassified.Clostridiales_unclassified.Otu0324                    | N | 2.092924 | 2.07E-09 |

|                                                                                                   |   |          |          |
|---------------------------------------------------------------------------------------------------|---|----------|----------|
| Firmicutes.Clostridia.Clostridiales.Clostridiales_unclassified.Clostridiales_unclassified.Otu0326 | N | 2.126176 | 0.034542 |
| Firmicutes.Clostridia.Clostridiales.Clostridiales_unclassified.Clostridiales_unclassified.Otu0349 | N | 2.142648 | 0.009157 |
| Firmicutes.Clostridia.Clostridiales.Clostridiales_unclassified.Clostridiales_unclassified.Otu2895 | P | 2.144008 | 0.03557  |
| Firmicutes.Clostridia.Clostridiales.Clostridiales_unclassified.Clostridiales_unclassified.Otu4557 | P | 2.559544 | 0.03557  |
| Firmicutes.Clostridia.Clostridiales.Clostridiales_unclassified.Clostridiales_unclassified.Otu4846 | P | 2.474725 | 0.03557  |
| Firmicutes.Clostridia.Clostridiales.Clostridiales_unclassified.Clostridiales_unclassified.Otu5107 | P | 2.5834   | 0.03557  |
| Firmicutes.Clostridia.Clostridiales.Clostridiales_unclassified.Clostridiales_unclassified.Otu6380 | P | 2.758641 | 0.03557  |
| Firmicutes.Clostridia.Clostridiales.Clostridiales_unclassified.Clostridiales_unclassified.Otu6406 | P | 2.386453 | 0.03557  |
| Firmicutes.Clostridia.Clostridiales.Clostridiales_unclassified.Clostridiales_unclassified.Otu6535 | P | 2.527102 | 0.03557  |
| Firmicutes.Clostridia.Clostridiales.Clostridiales_unclassified.Clostridiales_unclassified.Otu6712 | P | 2.078897 | 0.03557  |
| Firmicutes.Clostridia.Clostridiales.Clostridiales_unclassified.Clostridiales_unclassified.Otu7068 | P | 2.518751 | 0.03557  |
| Firmicutes.Clostridia.Clostridiales.Clostridiales_unclassified.Clostridiales_unclassified.Otu7257 | P | 2.290015 | 0.03557  |
| Firmicutes.Clostridia.Clostridiales.Eubacteriaceae                                                | N | 2.016888 | 3.58E-05 |
| Firmicutes.Clostridia.Clostridiales.Eubacteriaceae.Eubacterium.Otu7178                            | P | 2.433514 | 0.03557  |
| Firmicutes.Clostridia.Clostridiales.Lachnospiraceae                                               | N | 4.623296 | 8.59E-20 |
| Firmicutes.Clostridia.Clostridiales.Lachnospiraceae.Anaerostipes                                  | N | 3.015136 | 2.84E-13 |
| Firmicutes.Clostridia.Clostridiales.Lachnospiraceae.Anaerostipes.Otu0060                          | N | 2.96307  | 8.15E-09 |
| Firmicutes.Clostridia.Clostridiales.Lachnospiraceae.Anaerostipes.Otu0302                          | N | 2.024256 | 0.000531 |
| Firmicutes.Clostridia.Clostridiales.Lachnospiraceae.Blautia                                       | N | 3.794083 | 6.99E-21 |
| Firmicutes.Clostridia.Clostridiales.Lachnospiraceae.Blautia.Otu0021                               | N | 3.260295 | 8.14E-14 |
| Firmicutes.Clostridia.Clostridiales.Lachnospiraceae.Blautia.Otu0046                               | N | 3.206015 | 2.27E-12 |
| Firmicutes.Clostridia.Clostridiales.Lachnospiraceae.Blautia.Otu0049                               | N | 2.845721 | 8.55E-08 |
| Firmicutes.Clostridia.Clostridiales.Lachnospiraceae.Blautia.Otu0103                               | N | 2.742976 | 4.91E-10 |
| Firmicutes.Clostridia.Clostridiales.Lachnospiraceae.Blautia.Otu0104                               | N | 2.631882 | 8.69E-05 |
| Firmicutes.Clostridia.Clostridiales.Lachnospiraceae.Blautia.Otu0146                               | N | 2.436371 | 2.78E-05 |
| Firmicutes.Clostridia.Clostridiales.Lachnospiraceae.Blautia.Otu0161                               | N | 2.656631 | 0.000396 |
| Firmicutes.Clostridia.Clostridiales.Lachnospiraceae.Blautia.Otu3872                               | P | 2.48613  | 0.03557  |
| Firmicutes.Clostridia.Clostridiales.Lachnospiraceae.Blautia.Otu4054                               | P | 2.624601 | 0.03557  |
| Firmicutes.Clostridia.Clostridiales.Lachnospiraceae.Blautia.Otu4287                               | P | 2.513707 | 0.03557  |
| Firmicutes.Clostridia.Clostridiales.Lachnospiraceae.Blautia.Otu4856                               | P | 2.31258  | 0.03557  |
| Firmicutes.Clostridia.Clostridiales.Lachnospiraceae.Blautia.Otu4962                               | P | 2.379538 | 0.03557  |
| Firmicutes.Clostridia.Clostridiales.Lachnospiraceae.Blautia.Otu5061                               | P | 2.163697 | 0.03557  |

|                                                                              |   |          |          |
|------------------------------------------------------------------------------|---|----------|----------|
| Firmicutes.Clostridia.Clostridiales.Lachnospiraceae.Blautia.Otu5297          | P | 2.850238 | 0.03557  |
| Firmicutes.Clostridia.Clostridiales.Lachnospiraceae.Blautia.Otu6178          | P | 2.341916 | 0.03557  |
| Firmicutes.Clostridia.Clostridiales.Lachnospiraceae.Blautia.Otu6332          | P | 2.590682 | 0.03557  |
| Firmicutes.Clostridia.Clostridiales.Lachnospiraceae.Blautia.Otu6603          | P | 2.410077 | 0.03557  |
| Firmicutes.Clostridia.Clostridiales.Lachnospiraceae.Blautia.Otu6860          | P | 2.425957 | 0.03557  |
| Firmicutes.Clostridia.Clostridiales.Lachnospiraceae.Clostridium_XIVa         | N | 3.92768  | 2.44E-15 |
| Firmicutes.Clostridia.Clostridiales.Lachnospiraceae.Clostridium_XIVa.Otu0026 | N | 3.104339 | 5.96E-06 |
| Firmicutes.Clostridia.Clostridiales.Lachnospiraceae.Clostridium_XIVa.Otu0035 | N | 3.37782  | 3.9E-10  |
| Firmicutes.Clostridia.Clostridiales.Lachnospiraceae.Clostridium_XIVa.Otu0056 | N | 2.801183 | 0.000441 |
| Firmicutes.Clostridia.Clostridiales.Lachnospiraceae.Clostridium_XIVa.Otu0085 | N | 3.02477  | 6.89E-09 |
| Firmicutes.Clostridia.Clostridiales.Lachnospiraceae.Clostridium_XIVa.Otu0107 | N | 2.710704 | 9.25E-07 |
| Firmicutes.Clostridia.Clostridiales.Lachnospiraceae.Clostridium_XIVa.Otu0115 | N | 2.653232 | 0.000532 |
| Firmicutes.Clostridia.Clostridiales.Lachnospiraceae.Clostridium_XIVa.Otu0131 | N | 2.671782 | 2.59E-07 |
| Firmicutes.Clostridia.Clostridiales.Lachnospiraceae.Clostridium_XIVa.Otu0165 | N | 2.6047   | 7.52E-11 |
| Firmicutes.Clostridia.Clostridiales.Lachnospiraceae.Clostridium_XIVa.Otu0182 | N | 2.437816 | 8.14E-08 |
| Firmicutes.Clostridia.Clostridiales.Lachnospiraceae.Clostridium_XIVa.Otu0199 | N | 2.002441 | 9.04E-05 |
| Firmicutes.Clostridia.Clostridiales.Lachnospiraceae.Clostridium_XIVa.Otu0215 | N | 2.464263 | 1.16E-05 |
| Firmicutes.Clostridia.Clostridiales.Lachnospiraceae.Clostridium_XIVa.Otu0223 | P | 2.049206 | 0.008401 |
| Firmicutes.Clostridia.Clostridiales.Lachnospiraceae.Clostridium_XIVa.Otu0226 | N | 2.302154 | 0.026758 |
| Firmicutes.Clostridia.Clostridiales.Lachnospiraceae.Clostridium_XIVa.Otu0247 | N | 2.007251 | 0.000564 |
| Firmicutes.Clostridia.Clostridiales.Lachnospiraceae.Clostridium_XIVa.Otu0285 | N | 2.091999 | 2.72E-06 |
| Firmicutes.Clostridia.Clostridiales.Lachnospiraceae.Clostridium_XIVa.Otu3339 | P | 2.535425 | 0.03557  |
| Firmicutes.Clostridia.Clostridiales.Lachnospiraceae.Clostridium_XIVa.Otu3589 | P | 2.546203 | 0.03557  |
| Firmicutes.Clostridia.Clostridiales.Lachnospiraceae.Clostridium_XIVa.Otu4936 | P | 2.653628 | 0.03557  |
| Firmicutes.Clostridia.Clostridiales.Lachnospiraceae.Clostridium_XIVa.Otu5869 | P | 2.637773 | 0.03557  |
| Firmicutes.Clostridia.Clostridiales.Lachnospiraceae.Clostridium_XIVa.Otu5979 | P | 2.366206 | 0.03557  |
| Firmicutes.Clostridia.Clostridiales.Lachnospiraceae.Clostridium_XIVa.Otu6030 | P | 2.376933 | 0.03557  |
| Firmicutes.Clostridia.Clostridiales.Lachnospiraceae.Clostridium_XIVa.Otu6139 | P | 2.534585 | 0.03557  |
| Firmicutes.Clostridia.Clostridiales.Lachnospiraceae.Clostridium_XIVa.Otu6187 | P | 2.658861 | 0.03557  |
| Firmicutes.Clostridia.Clostridiales.Lachnospiraceae.Clostridium_XIVa.Otu6434 | P | 2.597782 | 0.03557  |
| Firmicutes.Clostridia.Clostridiales.Lachnospiraceae.Clostridium_XIVa.Otu6711 | P | 2.461405 | 0.03557  |
| Firmicutes.Clostridia.Clostridiales.Lachnospiraceae.Clostridium_XIVa.Otu6778 | P | 2.827516 | 0.03557  |

|                                                                                          |   |          |          |
|------------------------------------------------------------------------------------------|---|----------|----------|
| Firmicutes.Clostridia.Clostridiales.Lachnospiraceae.Clostridium_XIVa.Otu6832             | P | 2.342851 | 0.03557  |
| Firmicutes.Clostridia.Clostridiales.Lachnospiraceae.Clostridium_XIVb                     | N | 3.05561  | 7.22E-10 |
| Firmicutes.Clostridia.Clostridiales.Lachnospiraceae.Clostridium_XIVb.Otu0116             | N | 2.899211 | 0.023803 |
| Firmicutes.Clostridia.Clostridiales.Lachnospiraceae.Clostridium_XIVb.Otu0235             | N | 2.279095 | 0.044843 |
| Firmicutes.Clostridia.Clostridiales.Lachnospiraceae.Clostridium_XIVb.Otu7213             | P | 2.778884 | 0.03557  |
| Firmicutes.Clostridia.Clostridiales.Lachnospiraceae.Coprococcus                          | N | 3.201786 | 5.33E-15 |
| Firmicutes.Clostridia.Clostridiales.Lachnospiraceae.Coprococcus.Otu0125                  | N | 2.762899 | 9.11E-10 |
| Firmicutes.Clostridia.Clostridiales.Lachnospiraceae.Coprococcus.Otu0147                  | N | 2.699896 | 8.97E-07 |
| Firmicutes.Clostridia.Clostridiales.Lachnospiraceae.Coprococcus.Otu0239                  | N | 2.33967  | 0.025864 |
| Firmicutes.Clostridia.Clostridiales.Lachnospiraceae.Dorea                                | N | 3.102855 | 3.41E-13 |
| Firmicutes.Clostridia.Clostridiales.Lachnospiraceae.Dorea.Otu0098                        | N | 2.93088  | 4.65E-09 |
| Firmicutes.Clostridia.Clostridiales.Lachnospiraceae.Dorea.Otu0111                        | P | 2.224366 | 0.044742 |
| Firmicutes.Clostridia.Clostridiales.Lachnospiraceae.Dorea.Otu0122                        | N | 2.566487 | 4.05E-11 |
| Firmicutes.Clostridia.Clostridiales.Lachnospiraceae.Dorea.Otu4359                        | P | 2.173671 | 0.031034 |
| Firmicutes.Clostridia.Clostridiales.Lachnospiraceae.Dorea.Otu4822                        | P | 2.431295 | 0.03557  |
| Firmicutes.Clostridia.Clostridiales.Lachnospiraceae.Dorea.Otu6399                        | P | 2.530148 | 0.03557  |
| Firmicutes.Clostridia.Clostridiales.Lachnospiraceae.Lachnoanaerobaculum                  | P | 2.703109 | 0.000151 |
| Firmicutes.Clostridia.Clostridiales.Lachnospiraceae.Lachnoanaerobaculum.Otu0348          | P | 2.292928 | 0.040755 |
| Firmicutes.Clostridia.Clostridiales.Lachnospiraceae.Lachnoanaerobaculum.Otu0437          | P | 2.497103 | 3.32E-07 |
| Firmicutes.Clostridia.Clostridiales.Lachnospiraceae.Lachnospira                          | N | 3.141229 | 2.71E-07 |
| Firmicutes.Clostridia.Clostridiales.Lachnospiraceae.Lachnospira.Otu0059                  | N | 3.138507 | 2.84E-07 |
| Firmicutes.Clostridia.Clostridiales.Lachnospiraceae.Lachnospiraceae_unclassified         | N | 3.862523 | 3.86E-15 |
| Firmicutes.Clostridia.Clostridiales.Lachnospiraceae.Lachnospiraceae_unclassified.Otu0016 | N | 3.146678 | 0.005326 |
| Firmicutes.Clostridia.Clostridiales.Lachnospiraceae.Lachnospiraceae_unclassified.Otu0063 | N | 3.036323 | 2.89E-09 |
| Firmicutes.Clostridia.Clostridiales.Lachnospiraceae.Lachnospiraceae_unclassified.Otu0066 | N | 2.811653 | 1.02E-08 |
| Firmicutes.Clostridia.Clostridiales.Lachnospiraceae.Lachnospiraceae_unclassified.Otu0126 | N | 2.546735 | 0.000361 |
| Firmicutes.Clostridia.Clostridiales.Lachnospiraceae.Lachnospiraceae_unclassified.Otu0129 | N | 2.519507 | 9.4E-09  |
| Firmicutes.Clostridia.Clostridiales.Lachnospiraceae.Lachnospiraceae_unclassified.Otu0136 | N | 2.625379 | 0.000116 |
| Firmicutes.Clostridia.Clostridiales.Lachnospiraceae.Lachnospiraceae_unclassified.Otu0144 | N | 2.717181 | 0.003241 |
| Firmicutes.Clostridia.Clostridiales.Lachnospiraceae.Lachnospiraceae_unclassified.Otu0153 | N | 2.66901  | 2.93E-07 |
| Firmicutes.Clostridia.Clostridiales.Lachnospiraceae.Lachnospiraceae_unclassified.Otu0167 | N | 2.448636 | 1.31E-06 |
| Firmicutes.Clostridia.Clostridiales.Lachnospiraceae.Lachnospiraceae_unclassified.Otu0185 | N | 2.576654 | 6.83E-08 |

|                                                                                          |   |          |          |
|------------------------------------------------------------------------------------------|---|----------|----------|
| Firmicutes.Clostridia.Clostridiales.Lachnospiraceae.Lachnospiraceae_unclassified.Otu0209 | N | 2.399444 | 9.82E-05 |
| Firmicutes.Clostridia.Clostridiales.Lachnospiraceae.Lachnospiraceae_unclassified.Otu0248 | N | 2.378986 | 0.016357 |
| Firmicutes.Clostridia.Clostridiales.Lachnospiraceae.Lachnospiraceae_unclassified.Otu0250 | N | 2.321482 | 0.000138 |
| Firmicutes.Clostridia.Clostridiales.Lachnospiraceae.Lachnospiraceae_unclassified.Otu0259 | N | 2.165388 | 0.000132 |
| Firmicutes.Clostridia.Clostridiales.Lachnospiraceae.Lachnospiraceae_unclassified.Otu0264 | N | 2.275153 | 3.52E-05 |
| Firmicutes.Clostridia.Clostridiales.Lachnospiraceae.Lachnospiraceae_unclassified.Otu0268 | N | 2.179496 | 4.32E-05 |
| Firmicutes.Clostridia.Clostridiales.Lachnospiraceae.Lachnospiraceae_unclassified.Otu0276 | N | 2.21373  | 6.91E-06 |
| Firmicutes.Clostridia.Clostridiales.Lachnospiraceae.Lachnospiraceae_unclassified.Otu0489 | P | 2.444485 | 0.006522 |
| Firmicutes.Clostridia.Clostridiales.Lachnospiraceae.Lachnospiraceae_unclassified.Otu2715 | P | 2.648414 | 0.03557  |
| Firmicutes.Clostridia.Clostridiales.Lachnospiraceae.Lachnospiraceae_unclassified.Otu3183 | P | 2.127236 | 0.03557  |
| Firmicutes.Clostridia.Clostridiales.Lachnospiraceae.Lachnospiraceae_unclassified.Otu3358 | P | 2.266349 | 0.031509 |
| Firmicutes.Clostridia.Clostridiales.Lachnospiraceae.Lachnospiraceae_unclassified.Otu3398 | P | 2.615489 | 0.03557  |
| Firmicutes.Clostridia.Clostridiales.Lachnospiraceae.Lachnospiraceae_unclassified.Otu3598 | P | 2.401048 | 0.03557  |
| Firmicutes.Clostridia.Clostridiales.Lachnospiraceae.Lachnospiraceae_unclassified.Otu3714 | P | 2.320896 | 0.03557  |
| Firmicutes.Clostridia.Clostridiales.Lachnospiraceae.Lachnospiraceae_unclassified.Otu3787 | P | 2.575182 | 0.03557  |
| Firmicutes.Clostridia.Clostridiales.Lachnospiraceae.Lachnospiraceae_unclassified.Otu4064 | P | 2.23846  | 0.002926 |
| Firmicutes.Clostridia.Clostridiales.Lachnospiraceae.Lachnospiraceae_unclassified.Otu4084 | P | 2.15841  | 0.03557  |
| Firmicutes.Clostridia.Clostridiales.Lachnospiraceae.Lachnospiraceae_unclassified.Otu4173 | P | 2.520705 | 0.03557  |
| Firmicutes.Clostridia.Clostridiales.Lachnospiraceae.Lachnospiraceae_unclassified.Otu4260 | P | 2.439087 | 0.03557  |
| Firmicutes.Clostridia.Clostridiales.Lachnospiraceae.Lachnospiraceae_unclassified.Otu4277 | P | 2.305705 | 0.03557  |
| Firmicutes.Clostridia.Clostridiales.Lachnospiraceae.Lachnospiraceae_unclassified.Otu4380 | P | 2.499438 | 0.03557  |
| Firmicutes.Clostridia.Clostridiales.Lachnospiraceae.Lachnospiraceae_unclassified.Otu4487 | P | 2.168201 | 0.03557  |
| Firmicutes.Clostridia.Clostridiales.Lachnospiraceae.Lachnospiraceae_unclassified.Otu4648 | P | 2.631243 | 0.03557  |
| Firmicutes.Clostridia.Clostridiales.Lachnospiraceae.Lachnospiraceae_unclassified.Otu5195 | P | 2.503496 | 0.03557  |
| Firmicutes.Clostridia.Clostridiales.Lachnospiraceae.Lachnospiraceae_unclassified.Otu5227 | P | 2.557303 | 0.03557  |
| Firmicutes.Clostridia.Clostridiales.Lachnospiraceae.Lachnospiraceae_unclassified.Otu5301 | P | 2.455042 | 0.03557  |
| Firmicutes.Clostridia.Clostridiales.Lachnospiraceae.Lachnospiraceae_unclassified.Otu5347 | P | 2.23052  | 0.03557  |
| Firmicutes.Clostridia.Clostridiales.Lachnospiraceae.Lachnospiraceae_unclassified.Otu5380 | P | 2.754359 | 0.03557  |
| Firmicutes.Clostridia.Clostridiales.Lachnospiraceae.Lachnospiraceae_unclassified.Otu5441 | P | 2.267822 | 0.03557  |
| Firmicutes.Clostridia.Clostridiales.Lachnospiraceae.Lachnospiraceae_unclassified.Otu5651 | P | 2.592784 | 0.03557  |
| Firmicutes.Clostridia.Clostridiales.Lachnospiraceae.Lachnospiraceae_unclassified.Otu5839 | P | 2.575576 | 0.03557  |
| Firmicutes.Clostridia.Clostridiales.Lachnospiraceae.Lachnospiraceae_unclassified.Otu5866 | P | 2.402546 | 0.03557  |

|                                                                                          |   |          |          |
|------------------------------------------------------------------------------------------|---|----------|----------|
| Firmicutes.Clostridia.Clostridiales.Lachnospiraceae.Lachnospiraceae_unclassified.Otu5870 | P | 2.348388 | 0.03557  |
| Firmicutes.Clostridia.Clostridiales.Lachnospiraceae.Lachnospiraceae_unclassified.Otu6081 | P | 2.909153 | 0.03557  |
| Firmicutes.Clostridia.Clostridiales.Lachnospiraceae.Lachnospiraceae_unclassified.Otu6200 | P | 2.290854 | 0.03557  |
| Firmicutes.Clostridia.Clostridiales.Lachnospiraceae.Lachnospiraceae_unclassified.Otu6358 | P | 2.473994 | 0.03557  |
| Firmicutes.Clostridia.Clostridiales.Lachnospiraceae.Lachnospiraceae_unclassified.Otu6427 | P | 2.50262  | 0.03557  |
| Firmicutes.Clostridia.Clostridiales.Lachnospiraceae.Lachnospiraceae_unclassified.Otu6486 | P | 2.461423 | 0.03557  |
| Firmicutes.Clostridia.Clostridiales.Lachnospiraceae.Lachnospiraceae_unclassified.Otu6526 | P | 2.288605 | 0.03557  |
| Firmicutes.Clostridia.Clostridiales.Lachnospiraceae.Lachnospiraceae_unclassified.Otu6633 | P | 2.358278 | 0.03557  |
| Firmicutes.Clostridia.Clostridiales.Lachnospiraceae.Lachnospiraceae_unclassified.Otu6645 | P | 2.464947 | 0.03557  |
| Firmicutes.Clostridia.Clostridiales.Lachnospiraceae.Lachnospiraceae_unclassified.Otu6664 | P | 2.208204 | 0.03557  |
| Firmicutes.Clostridia.Clostridiales.Lachnospiraceae.Lachnospiraceae_unclassified.Otu6702 | P | 2.223631 | 0.03557  |
| Firmicutes.Clostridia.Clostridiales.Lachnospiraceae.Lachnospiraceae_unclassified.Otu6713 | P | 2.373804 | 0.03557  |
| Firmicutes.Clostridia.Clostridiales.Lachnospiraceae.Lachnospiraceae_unclassified.Otu6717 | P | 2.49197  | 0.03557  |
| Firmicutes.Clostridia.Clostridiales.Lachnospiraceae.Lachnospiraceae_unclassified.Otu6866 | P | 2.061392 | 0.03557  |
| Firmicutes.Clostridia.Clostridiales.Lachnospiraceae.Lachnospiraceae_unclassified.Otu6879 | P | 2.385906 | 0.03557  |
| Firmicutes.Clostridia.Clostridiales.Lachnospiraceae.Lachnospiraceae_unclassified.Otu7032 | P | 2.426947 | 0.03557  |
| Firmicutes.Clostridia.Clostridiales.Lachnospiraceae.Lachnospiraceae_unclassified.Otu7033 | P | 2.599872 | 0.03557  |
| Firmicutes.Clostridia.Clostridiales.Lachnospiraceae.Lachnospiraceae_unclassified.Otu7062 | P | 2.230711 | 0.03557  |
| Firmicutes.Clostridia.Clostridiales.Lachnospiraceae.Lachnospiraceae_unclassified.Otu7122 | P | 2.512657 | 0.03557  |
| Firmicutes.Clostridia.Clostridiales.Lachnospiraceae.Lachnospiraceae_unclassified.Otu7144 | P | 2.102984 | 0.03557  |
| Firmicutes.Clostridia.Clostridiales.Lachnospiraceae.Lachnospiraceae_unclassified.Otu7246 | P | 2.443154 | 0.03557  |
| Firmicutes.Clostridia.Clostridiales.Lachnospiraceae.Lachnospiraceae_unclassified.Otu7327 | P | 2.308125 | 0.03557  |
| Firmicutes.Clostridia.Clostridiales.Lachnospiraceae.Moryella                             | P | 2.370568 | 0.005783 |
| Firmicutes.Clostridia.Clostridiales.Lachnospiraceae.Moryella.Otu0426                     | P | 2.386594 | 0.001713 |
| Firmicutes.Clostridia.Clostridiales.Lachnospiraceae.Oribacterium.Otu4450                 | P | 2.228104 | 0.03557  |
| Firmicutes.Clostridia.Clostridiales.Lachnospiraceae.Oribacterium.Otu6669                 | P | 2.010754 | 0.03557  |
| Firmicutes.Clostridia.Clostridiales.Lachnospiraceae.Roseburia                            | N | 4.05566  | 1.03E-14 |
| Firmicutes.Clostridia.Clostridiales.Lachnospiraceae.Roseburia.Otu0012                    | N | 3.857048 | 9.4E-12  |
| Firmicutes.Clostridia.Clostridiales.Lachnospiraceae.Roseburia.Otu0034                    | N | 3.466419 | 3.47E-10 |
| Firmicutes.Clostridia.Clostridiales.Lachnospiraceae.Roseburia.Otu0169                    | N | 2.552445 | 7.9E-08  |
| Firmicutes.Clostridia.Clostridiales.Lachnospiraceae.Roseburia.Otu0227                    | N | 2.439768 | 0.002522 |
| Firmicutes.Clostridia.Clostridiales.Lachnospiraceae.Roseburia.Otu0299                    | N | 2.199818 | 9.32E-11 |

|                                                                                      |   |          |          |
|--------------------------------------------------------------------------------------|---|----------|----------|
| Firmicutes.Clostridia.Clostridiales.Lachnospiraceae.Roseburia.Otu0340                | N | 2.03786  | 2.01E-06 |
| Firmicutes.Clostridia.Clostridiales.Lachnospiraceae.Roseburia.Otu4298                | P | 2.573373 | 0.03557  |
| Firmicutes.Clostridia.Clostridiales.Lachnospiraceae.Roseburia.Otu4554                | P | 2.593251 | 0.03557  |
| Firmicutes.Clostridia.Clostridiales.Lachnospiraceae.Roseburia.Otu4665                | P | 2.670395 | 0.03557  |
| Firmicutes.Clostridia.Clostridiales.Lachnospiraceae.Roseburia.Otu6467                | P | 2.441235 | 0.03557  |
| Firmicutes.Clostridia.Clostridiales.Lachnospiraceae.Roseburia.Otu6520                | P | 2.350847 | 0.03557  |
| Firmicutes.Clostridia.Clostridiales.Lachnospiraceae.Roseburia.Otu6896                | P | 2.161745 | 0.03557  |
| Firmicutes.Clostridia.Clostridiales.Lachnospiraceae.Ruminococcus2                    | N | 3.515501 | 5.04E-14 |
| Firmicutes.Clostridia.Clostridiales.Lachnospiraceae.Ruminococcus2.Otu0051            | N | 3.188693 | 1.77E-10 |
| Firmicutes.Clostridia.Clostridiales.Lachnospiraceae.Ruminococcus2.Otu0052            | N | 3.075256 | 4.87E-05 |
| Firmicutes.Clostridia.Clostridiales.Lachnospiraceae.Ruminococcus2.Otu0152            | N | 2.340302 | 2.77E-05 |
| Firmicutes.Clostridia.Clostridiales.Lachnospiraceae.Ruminococcus2.Otu0213            | N | 2.349315 | 1.76E-05 |
| Firmicutes.Clostridia.Clostridiales.Lachnospiraceae.Ruminococcus2.Otu4786            | P | 2.465472 | 0.03557  |
| Firmicutes.Clostridia.Clostridiales.Peptococcaceae_1.Peptococcus.Otu2327             | P | 2.415132 | 0.03557  |
| Firmicutes.Clostridia.Clostridiales.Peptostreptococcaceae                            | P | 2.995383 | 0.007626 |
| Firmicutes.Clostridia.Clostridiales.Peptostreptococcaceae.Clostridium_XI             | P | 2.981835 | 5.94E-05 |
| Firmicutes.Clostridia.Clostridiales.Peptostreptococcaceae.Clostridium_XI.Otu0145     | P | 2.725991 | 8.12E-06 |
| Firmicutes.Clostridia.Clostridiales.Peptostreptococcaceae.Clostridium_XI.Otu0157     | N | 2.448942 | 1.21E-06 |
| Firmicutes.Clostridia.Clostridiales.Peptostreptococcaceae.Clostridium_XI.Otu4494     | P | 2.496024 | 0.03557  |
| Firmicutes.Clostridia.Clostridiales.Peptostreptococcaceae.Clostridium_XI.Otu5426     | P | 2.483986 | 0.03557  |
| Firmicutes.Clostridia.Clostridiales.Peptostreptococcaceae.Clostridium_XI.Otu6352     | P | 2.831425 | 0.03557  |
| Firmicutes.Clostridia.Clostridiales.Peptostreptococcaceae.Peptostreptococcus         | P | 2.131364 | 0.047713 |
| Firmicutes.Clostridia.Clostridiales.Peptostreptococcaceae.Peptostreptococcus.Otu0283 | P | 2.150713 | 0.047455 |
| Firmicutes.Clostridia.Clostridiales.Peptostreptococcaceae.Peptostreptococcus.Otu4294 | P | 2.248459 | 0.03557  |
| Firmicutes.Clostridia.Clostridiales.Peptostreptococcaceae.Peptostreptococcus.Otu5198 | P | 2.611432 | 0.03557  |
| Firmicutes.Clostridia.Clostridiales.Ruminococcaceae                                  | N | 4.784961 | 3.63E-27 |
| Firmicutes.Clostridia.Clostridiales.Ruminococcaceae.Butyricoccus                     | N | 2.489513 | 8.71E-12 |
| Firmicutes.Clostridia.Clostridiales.Ruminococcaceae.Butyricoccus.Otu0255             | N | 2.283081 | 1.67E-10 |
| Firmicutes.Clostridia.Clostridiales.Ruminococcaceae.Butyricoccus.Otu4597             | P | 2.360366 | 0.03557  |
| Firmicutes.Clostridia.Clostridiales.Ruminococcaceae.Clostridium_IV                   | N | 3.392065 | 1.24E-17 |
| Firmicutes.Clostridia.Clostridiales.Ruminococcaceae.Clostridium_IV.Otu0123           | N | 2.765504 | 3.05E-06 |
| Firmicutes.Clostridia.Clostridiales.Ruminococcaceae.Clostridium_IV.Otu0134           | N | 2.842239 | 0.008873 |



|                                                                                  |   |          |          |
|----------------------------------------------------------------------------------|---|----------|----------|
| Firmicutes.Clostridia.Clostridiales.Ruminococcaceae.Clostridium_IV.Otu0333       | N | 2.083479 | 5.93E-05 |
| Firmicutes.Clostridia.Clostridiales.Ruminococcaceae.Clostridium_IV.Otu6867       | P | 2.483621 | 0.03557  |
| Firmicutes.Clostridia.Clostridiales.Ruminococcaceae.Faecalibacterium             | N | 4.599637 | 5.85E-20 |
| Firmicutes.Clostridia.Clostridiales.Ruminococcaceae.Faecalibacterium.Otu0003     | N | 4.547242 | 6.6E-19  |
| Firmicutes.Clostridia.Clostridiales.Ruminococcaceae.Faecalibacterium.Otu0024     | N | 3.468084 | 3.3E-08  |
| Firmicutes.Clostridia.Clostridiales.Ruminococcaceae.Faecalibacterium.Otu0191     | N | 2.470491 | 6.56E-11 |
| Firmicutes.Clostridia.Clostridiales.Ruminococcaceae.Faecalibacterium.Otu0338     | N | 2.033452 | 1.35E-13 |
| Firmicutes.Clostridia.Clostridiales.Ruminococcaceae.Faecalibacterium.Otu3489     | P | 2.433477 | 0.03557  |
| Firmicutes.Clostridia.Clostridiales.Ruminococcaceae.Faecalibacterium.Otu3998     | P | 2.021437 | 0.002926 |
| Firmicutes.Clostridia.Clostridiales.Ruminococcaceae.Faecalibacterium.Otu5055     | P | 2.607884 | 0.03557  |
| Firmicutes.Clostridia.Clostridiales.Ruminococcaceae.Faecalibacterium.Otu5116     | P | 2.370749 | 0.03557  |
| Firmicutes.Clostridia.Clostridiales.Ruminococcaceae.Faecalibacterium.Otu5647     | P | 2.62766  | 0.03557  |
| Firmicutes.Clostridia.Clostridiales.Ruminococcaceae.Faecalibacterium.Otu5828     | P | 2.343784 | 0.03557  |
| Firmicutes.Clostridia.Clostridiales.Ruminococcaceae.Flavonifractor               | N | 3.293399 | 8.68E-23 |
| Firmicutes.Clostridia.Clostridiales.Ruminococcaceae.Flavonifractor.Otu0055       | N | 3.174505 | 2.61E-19 |
| Firmicutes.Clostridia.Clostridiales.Ruminococcaceae.Flavonifractor.Otu0232       | N | 2.469019 | 0.006745 |
| Firmicutes.Clostridia.Clostridiales.Ruminococcaceae.Flavonifractor.Otu0296       | N | 2.144891 | 2.96E-09 |
| Firmicutes.Clostridia.Clostridiales.Ruminococcaceae.Flavonifractor.Otu7022       | P | 2.685374 | 0.03557  |
| Firmicutes.Clostridia.Clostridiales.Ruminococcaceae.Gemmiger                     | N | 3.202421 | 5.5E-08  |
| Firmicutes.Clostridia.Clostridiales.Ruminococcaceae.Gemmiger.Otu0048             | N | 3.200677 | 5.35E-08 |
| Firmicutes.Clostridia.Clostridiales.Ruminococcaceae.Gemmiger.Otu5923             | P | 2.337617 | 0.03557  |
| Firmicutes.Clostridia.Clostridiales.Ruminococcaceae.Gemmiger.Otu7165             | P | 2.482002 | 0.03557  |
| Firmicutes.Clostridia.Clostridiales.Ruminococcaceae.Oscillibacter                | N | 3.778178 | 1.09E-20 |
| Firmicutes.Clostridia.Clostridiales.Ruminococcaceae.Oscillibacter.Otu0032        | N | 3.534052 | 1.54E-10 |
| Firmicutes.Clostridia.Clostridiales.Ruminococcaceae.Oscillibacter.Otu0084        | N | 3.098075 | 1.02E-06 |
| Firmicutes.Clostridia.Clostridiales.Ruminococcaceae.Oscillibacter.Otu0101        | N | 2.956057 | 5.61E-16 |
| Firmicutes.Clostridia.Clostridiales.Ruminococcaceae.Oscillibacter.Otu0271        | N | 2.22955  | 0.004887 |
| Firmicutes.Clostridia.Clostridiales.Ruminococcaceae.Pseudoflavonifractor         | P | 3.594009 | 1.34E-13 |
| Firmicutes.Clostridia.Clostridiales.Ruminococcaceae.Pseudoflavonifractor.Otu0057 | P | 3.602119 | 8.09E-06 |
| Firmicutes.Clostridia.Clostridiales.Ruminococcaceae.Pseudoflavonifractor.Otu0218 | N | 2.423235 | 1.42E-11 |
| Firmicutes.Clostridia.Clostridiales.Ruminococcaceae.Pseudoflavonifractor.Otu5091 | P | 2.540533 | 0.03557  |
| Firmicutes.Clostridia.Clostridiales.Ruminococcaceae.Pseudoflavonifractor.Otu6831 | P | 2.871587 | 0.03557  |

|                                                                                          |   |          |          |
|------------------------------------------------------------------------------------------|---|----------|----------|
| Firmicutes.Clostridia.Clostridiales.Ruminococcaceae.Ruminococcaceae_unclassified         | N | 3.854641 | 1.11E-22 |
| Firmicutes.Clostridia.Clostridiales.Ruminococcaceae.Ruminococcaceae_unclassified.Otu0062 | N | 3.177166 | 1.77E-05 |
| Firmicutes.Clostridia.Clostridiales.Ruminococcaceae.Ruminococcaceae_unclassified.Otu0082 | N | 3.159992 | 0.000347 |
| Firmicutes.Clostridia.Clostridiales.Ruminococcaceae.Ruminococcaceae_unclassified.Otu0177 | N | 2.62794  | 3.22E-06 |
| Firmicutes.Clostridia.Clostridiales.Ruminococcaceae.Ruminococcaceae_unclassified.Otu0180 | N | 2.505808 | 4.98E-13 |
| Firmicutes.Clostridia.Clostridiales.Ruminococcaceae.Ruminococcaceae_unclassified.Otu0194 | N | 2.632559 | 0.000995 |
| Firmicutes.Clostridia.Clostridiales.Ruminococcaceae.Ruminococcaceae_unclassified.Otu0221 | N | 2.232862 | 1.56E-06 |
| Firmicutes.Clostridia.Clostridiales.Ruminococcaceae.Ruminococcaceae_unclassified.Otu0233 | N | 2.377574 | 0.000141 |
| Firmicutes.Clostridia.Clostridiales.Ruminococcaceae.Ruminococcaceae_unclassified.Otu0281 | N | 2.160321 | 0.00089  |
| Firmicutes.Clostridia.Clostridiales.Ruminococcaceae.Ruminococcaceae_unclassified.Otu0312 | N | 2.12714  | 0.001273 |
| Firmicutes.Clostridia.Clostridiales.Ruminococcaceae.Ruminococcaceae_unclassified.Otu0317 | N | 2.03109  | 7.82E-05 |
| Firmicutes.Clostridia.Clostridiales.Ruminococcaceae.Ruminococcaceae_unclassified.Otu0332 | N | 2.091857 | 2.4E-08  |
| Firmicutes.Clostridia.Clostridiales.Ruminococcaceae.Ruminococcaceae_unclassified.Otu0356 | N | 2.029981 | 1.46E-05 |
| Firmicutes.Clostridia.Clostridiales.Ruminococcaceae.Ruminococcaceae_unclassified.Otu2266 | P | 2.341938 | 0.03557  |
| Firmicutes.Clostridia.Clostridiales.Ruminococcaceae.Ruminococcaceae_unclassified.Otu4650 | P | 2.306489 | 0.03557  |
| Firmicutes.Clostridia.Clostridiales.Ruminococcaceae.Ruminococcaceae_unclassified.Otu7067 | P | 2.448556 | 0.03557  |
| Firmicutes.Clostridia.Clostridiales.Ruminococcaceae.Ruminococcaceae_unclassified.Otu7079 | P | 2.233461 | 0.03557  |
| Firmicutes.Clostridia.Clostridiales.Ruminococcaceae.Ruminococcus                         | N | 3.547932 | 4E-13    |
| Firmicutes.Clostridia.Clostridiales.Ruminococcaceae.Ruminococcus.Otu0045                 | N | 3.311856 | 5.46E-08 |
| Firmicutes.Clostridia.Clostridiales.Ruminococcaceae.Ruminococcus.Otu0113                 | N | 2.822791 | 8.93E-05 |
| Firmicutes.Clostridia.Clostridiales.Ruminococcaceae.Ruminococcus.Otu0270                 | N | 2.267079 | 0.000684 |
| Firmicutes.Clostridia.Clostridiales.Ruminococcaceae.Sporobacter                          | N | 2.902963 | 7.68E-09 |
| Firmicutes.Clostridia.Clostridiales.Ruminococcaceae.Sporobacter.Otu0159                  | N | 2.692154 | 0.000123 |
| Firmicutes.Clostridia.Clostridiales.Ruminococcaceae.Sporobacter.Otu0202                  | N | 2.35372  | 5.3E-05  |
| Firmicutes.Clostridia.Clostridiales.Ruminococcaceae.Subdoligranulum                      | N | 2.900058 | 1.35E-11 |
| Firmicutes.Clostridia.Clostridiales.Ruminococcaceae.Subdoligranulum.Otu0093              | N | 2.936091 | 1.07E-11 |
| Firmicutes.Clostridia.Clostridiales.Ruminococcaceae.Subdoligranulum.Otu0204              | N | 2.240291 | 0.00186  |
| Firmicutes.Clostridia.Clostridiales.Ruminococcaceae.Subdoligranulum.Otu1818              | P | 2.5869   | 0.03557  |
| Firmicutes.Clostridia.Clostridiales.Ruminococcaceae.Subdoligranulum.Otu6745              | P | 2.498552 | 0.03557  |
| Firmicutes.Erysipelotrichia                                                              | P | 2.949362 | 2.39E-05 |
| Firmicutes.Erysipelotrichia.Erysipelotrichales                                           | P | 2.949362 | 2.39E-05 |
| Firmicutes.Erysipelotrichia.Erysipelotrichales.Erysipelotrichaceae                       | P | 2.949362 | 2.39E-05 |

|                                                                                                                    |   |          |          |
|--------------------------------------------------------------------------------------------------------------------|---|----------|----------|
| Firmicutes.Erysipelotrichia.Erysipelotrichales.Erysipelotrichaceae.Clostridium_XVIII                               | N | 2.79156  | 0.000116 |
| Firmicutes.Erysipelotrichia.Erysipelotrichales.Erysipelotrichaceae.Clostridium_XVIII.Otu0109                       | P | 2.741841 | 0.002632 |
| Firmicutes.Erysipelotrichia.Erysipelotrichales.Erysipelotrichaceae.Clostridium_XVIII.Otu5774                       | P | 2.276232 | 0.03557  |
| Firmicutes.Erysipelotrichia.Erysipelotrichales.Erysipelotrichaceae.Clostridium_XVIII.Otu7106                       | P | 2.499812 | 0.03557  |
| Firmicutes.Erysipelotrichia.Erysipelotrichales.Erysipelotrichaceae.Erysipelotrichaceae_unclassified                | N | 2.520372 | 0.031372 |
| Firmicutes.Erysipelotrichia.Erysipelotrichales.Erysipelotrichaceae.Holdemania.Otu6413                              | P | 2.36281  | 0.03557  |
| Firmicutes.Erysipelotrichia.Erysipelotrichales.Erysipelotrichaceae.Solobacterium                                   | P | 2.121571 | 0.039734 |
| Firmicutes.Erysipelotrichia.Erysipelotrichales.Erysipelotrichaceae.Solobacterium.Otu0391                           | P | 2.137067 | 0.034531 |
| Firmicutes.Erysipelotrichia.Erysipelotrichales.Erysipelotrichaceae.Solobacterium.Otu5546                           | P | 2.285387 | 0.03557  |
| Firmicutes.Erysipelotrichia.Erysipelotrichales.Erysipelotrichaceae.Turicibacter                                    | P | 2.902539 | 0.003408 |
| Firmicutes.Erysipelotrichia.Erysipelotrichales.Erysipelotrichaceae.Turicibacter.Otu0203                            | P | 2.889647 | 0.003354 |
| Firmicutes.Firmicutes_unclassified                                                                                 | N | 3.029602 | 3.14E-10 |
| Firmicutes.Firmicutes_unclassified.Firmicutes_unclassified                                                         | N | 3.030354 | 3.14E-10 |
| Firmicutes.Firmicutes_unclassified.Firmicutes_unclassified.Firmicutes_unclassified                                 | N | 3.029675 | 3.14E-10 |
| Firmicutes.Firmicutes_unclassified.Firmicutes_unclassified.Firmicutes_unclassified.Firmicutes_unclassified         | N | 3.028809 | 3.14E-10 |
| Firmicutes.Firmicutes_unclassified.Firmicutes_unclassified.Firmicutes_unclassified.Firmicutes_unclassified.Otu0170 | N | 2.599059 | 0.00021  |
| Firmicutes.Firmicutes_unclassified.Firmicutes_unclassified.Firmicutes_unclassified.Firmicutes_unclassified.Otu0229 | N | 2.35898  | 6.25E-06 |
| Firmicutes.Firmicutes_unclassified.Firmicutes_unclassified.Firmicutes_unclassified.Firmicutes_unclassified.Otu5031 | P | 2.650115 | 0.03557  |
| Firmicutes.Firmicutes_unclassified.Firmicutes_unclassified.Firmicutes_unclassified.Firmicutes_unclassified.Otu5248 | P | 2.585531 | 0.03557  |
| Firmicutes.Firmicutes_unclassified.Firmicutes_unclassified.Firmicutes_unclassified.Firmicutes_unclassified.Otu6006 | P | 2.530373 | 0.03557  |
| Firmicutes.Firmicutes_unclassified.Firmicutes_unclassified.Firmicutes_unclassified.Firmicutes_unclassified.Otu6657 | P | 2.500888 | 0.03557  |
| Firmicutes.Firmicutes_unclassified.Firmicutes_unclassified.Firmicutes_unclassified.Firmicutes_unclassified.Otu6704 | P | 2.637284 | 0.03557  |
| Firmicutes.Negativicutes                                                                                           | N | 4.170994 | 3.64E-05 |
| Firmicutes.Negativicutes.Selenomonadales                                                                           | N | 4.170994 | 3.64E-05 |
| Firmicutes.Negativicutes.Selenomonadales.Acidaminococcaceae                                                        | N | 4.054151 | 1.32E-08 |
| Firmicutes.Negativicutes.Selenomonadales.Acidaminococcaceae.Acidaminococcaceae_unclassified.Otu0053                | N | 3.225977 | 0.046195 |
| Firmicutes.Negativicutes.Selenomonadales.Acidaminococcaceae.Acidaminococcus.Otu3080                                | P | 2.594685 | 0.03557  |
| Firmicutes.Negativicutes.Selenomonadales.Acidaminococcaceae.Acidaminococcus.Otu5323                                | P | 2.619894 | 0.03557  |
| Firmicutes.Negativicutes.Selenomonadales.Acidaminococcaceae.Acidaminococcus.Otu6266                                | P | 2.490171 | 0.03557  |
| Firmicutes.Negativicutes.Selenomonadales.Acidaminococcaceae.Phascolarctobacterium                                  | N | 3.928497 | 9.52E-06 |
| Firmicutes.Negativicutes.Selenomonadales.Acidaminococcaceae.Phascolarctobacterium.Otu0011                          | N | 3.917668 | 6.93E-06 |
| Firmicutes.Negativicutes.Selenomonadales.Acidaminococcaceae.Phascolarctobacterium.Otu3585                          | P | 2.396318 | 0.03557  |

|                                                                                               |   |          |          |
|-----------------------------------------------------------------------------------------------|---|----------|----------|
| Firmicutes.Negativicutes.Selenomonadales.Acidaminococcaceae.Phascolarctobacterium.Otu6642     | P | 2.230598 | 0.03557  |
| Firmicutes.Negativicutes.Selenomonadales.Veillonellaceae.Centipeda.Otu5202                    | P | 2.190794 | 0.03557  |
| Firmicutes.Negativicutes.Selenomonadales.Veillonellaceae.Dialister                            | N | 3.596465 | 0.012663 |
| Firmicutes.Negativicutes.Selenomonadales.Veillonellaceae.Dialister.Otu0027                    | N | 3.570475 | 0.005674 |
| Firmicutes.Negativicutes.Selenomonadales.Veillonellaceae.Dialister.Otu4028                    | P | 2.056177 | 0.03557  |
| Firmicutes.Negativicutes.Selenomonadales.Veillonellaceae.Dialister.Otu5723                    | P | 2.551057 | 0.03557  |
| Firmicutes.Negativicutes.Selenomonadales.Veillonellaceae.Dialister.Otu7200                    | P | 2.189638 | 0.03557  |
| Firmicutes.Negativicutes.Selenomonadales.Veillonellaceae.Dialister.Otu7264                    | P | 2.769259 | 0.03557  |
| Firmicutes.Negativicutes.Selenomonadales.Veillonellaceae.Megamonas                            | N | 3.364104 | 0.046939 |
| Firmicutes.Negativicutes.Selenomonadales.Veillonellaceae.Megamonas.Otu0033                    | N | 3.363306 | 0.046212 |
| Firmicutes.Negativicutes.Selenomonadales.Veillonellaceae.Veillonella.Otu1529                  | P | 2.640799 | 0.03557  |
| Firmicutes.Negativicutes.Selenomonadales.Veillonellaceae.Veillonella.Otu5737                  | P | 2.539543 | 0.03557  |
| Firmicutes.Negativicutes.Selenomonadales.Veillonellaceae.Veillonella.Otu6162                  | P | 2.318364 | 0.03557  |
| Firmicutes.Negativicutes.Selenomonadales.Veillonellaceae.Veillonella.Otu6364                  | P | 2.350364 | 0.03557  |
| Firmicutes.Negativicutes.Selenomonadales.Veillonellaceae.Veillonella.Otu7097                  | P | 2.52606  | 0.03557  |
| Firmicutes.Negativicutes.Selenomonadales.Veillonellaceae.Veillonellaceae_unclassified.Otu2178 | P | 2.588507 | 0.03557  |
| Firmicutes.Negativicutes.Selenomonadales.Veillonellaceae.Veillonellaceae_unclassified.Otu4355 | P | 2.477507 | 0.03557  |
| Firmicutes.Negativicutes.Selenomonadales.Veillonellaceae.Veillonellaceae_unclassified.Otu5240 | P | 2.340486 | 0.03557  |
| Firmicutes.Negativicutes.Selenomonadales.Veillonellaceae.Veillonellaceae_unclassified.Otu7087 | P | 2.504454 | 0.03557  |
| Firmicutes.Negativicutes.Selenomonadales.Veillonellaceae.Veillonellaceae_unclassified.Otu7273 | P | 2.54682  | 0.03557  |
| Fusobacteria                                                                                  | P | 3.785157 | 0.034539 |
| Fusobacteria.Fusobacteriia                                                                    | P | 3.785157 | 0.034539 |
| Fusobacteria.Fusobacteriia.Fusobacteriales                                                    | P | 3.785157 | 0.034539 |
| Fusobacteria.Fusobacteriia.Fusobacteriales.Fusobacteriaceae.Cetobacterium.Otu4232             | P | 2.502359 | 0.03557  |
| Fusobacteria.Fusobacteriia.Fusobacteriales.Fusobacteriaceae.Cetobacterium.Otu6045             | P | 2.667195 | 0.03557  |
| Fusobacteria.Fusobacteriia.Fusobacteriales.Fusobacteriaceae.Fusobacterium.Otu3413             | P | 2.414368 | 0.03557  |
| Fusobacteria.Fusobacteriia.Fusobacteriales.Fusobacteriaceae.Fusobacterium.Otu3825             | P | 2.161426 | 0.000264 |
| Fusobacteria.Fusobacteriia.Fusobacteriales.Fusobacteriaceae.Fusobacterium.Otu3876             | P | 2.640737 | 0.03557  |
| Fusobacteria.Fusobacteriia.Fusobacteriales.Fusobacteriaceae.Fusobacterium.Otu4319             | P | 2.226656 | 0.03557  |
| Fusobacteria.Fusobacteriia.Fusobacteriales.Leptotrichiaceae                                   | P | 2.527169 | 0.003093 |
| Fusobacteria.Fusobacteriia.Fusobacteriales.Leptotrichiaceae.Leptotrichia                      | P | 2.515438 | 0.014068 |
| Fusobacteria.Fusobacteriia.Fusobacteriales.Leptotrichiaceae.Leptotrichia.Otu4517              | P | 2.700435 | 0.03557  |

|                                                                                                                                               |   |          |          |
|-----------------------------------------------------------------------------------------------------------------------------------------------|---|----------|----------|
| Fusobacteria.Fusobacteriia.Fusobacteriales.Leptotrichiaceae.Leptotrichia.Otu7292                                                              | P | 2.328657 | 0.03557  |
| Fusobacteria.Fusobacteriia.Fusobacteriales.Leptotrichiaceae.Sneathia.Otu1524                                                                  | P | 2.502713 | 0.03557  |
| Lentisphaerae                                                                                                                                 | N | 2.287408 | 0.013166 |
| Lentisphaerae.Lentisphaeria                                                                                                                   | N | 2.087376 | 0.018112 |
| Lentisphaerae.Lentisphaeria.Victivallales                                                                                                     | N | 2.087601 | 0.018112 |
| Lentisphaerae.Lentisphaeria.Victivallales.Victivallaceae                                                                                      | N | 2.078661 | 0.018112 |
| Lentisphaerae.Lentisphaeria.Victivallales.Victivallaceae.Victivallis                                                                          | N | 2.086662 | 0.018112 |
| Planctomycetes                                                                                                                                | P | 2.486531 | 0.03557  |
| Planctomycetes.Planctomycetia                                                                                                                 | P | 2.122229 | 0.03557  |
| Planctomycetes.Planctomycetia.Planctomycetales                                                                                                | P | 2.551204 | 0.03557  |
| Planctomycetes.Planctomycetia.Planctomycetales.Planctomycetaceae                                                                              | P | 2.142176 | 0.03557  |
| Planctomycetes.Planctomycetia.Planctomycetales.Planctomycetaceae.Planctomycetaceae_unclassified                                               | P | 2.071026 | 0.03557  |
| Planctomycetes.Planctomycetia.Planctomycetales.Planctomycetaceae.Planctomycetaceae_unclassified.Otu4838                                       | P | 2.248324 | 0.03557  |
| Proteobacteria                                                                                                                                | P | 5.353459 | 3.06E-50 |
| Proteobacteria.Alphaproteobacteria.Alphaproteobacteria_unclassified                                                                           | N | 3.087503 | 8.74E-05 |
| Proteobacteria.Alphaproteobacteria.Alphaproteobacteria_unclassified.Alphaproteobacteria_unclassified                                          | N | 3.096964 | 8.74E-05 |
| Proteobacteria.Alphaproteobacteria.Alphaproteobacteria_unclassified.Alphaproteobacteria_unclassified.Alphaproteobacteria_unclassified         | N | 3.093232 | 8.74E-05 |
| Proteobacteria.Alphaproteobacteria.Alphaproteobacteria_unclassified.Alphaproteobacteria_unclassified.Alphaproteobacteria_unclassified.Otu0252 | N | 2.336322 | 0.008009 |
| Proteobacteria.Alphaproteobacteria.Alphaproteobacteria_unclassified.Alphaproteobacteria_unclassified.Alphaproteobacteria_unclassified.Otu6041 | P | 2.094031 | 0.03557  |
| Proteobacteria.Alphaproteobacteria.Caulobacteriales.Caulobacteraceae.Brevundimonas.Otu1675                                                    | P | 2.053016 | 0.000264 |
| Proteobacteria.Alphaproteobacteria.Rhizobiales                                                                                                | P | 2.162724 | 0.000192 |
| Proteobacteria.Alphaproteobacteria.Rhizobiales.Brucellaceae.Brucella                                                                          | P | 2.263601 | 0.03557  |
| Proteobacteria.Alphaproteobacteria.Rhizobiales.Brucellaceae.Brucella.Otu5504                                                                  | P | 2.450309 | 0.03557  |
| Proteobacteria.Alphaproteobacteria.Rhizobiales.Rhizobiales_unclassified.Rhizobiales_unclassified.Otu5182                                      | P | 2.189782 | 0.03557  |
| Proteobacteria.Alphaproteobacteria.Rhodospirillales.Acetobacteraceae.Roseomonas                                                               | P | 2.432543 | 0.03557  |
| Proteobacteria.Alphaproteobacteria.Rhodospirillales.Acetobacteraceae.Roseomonas.Otu3481                                                       | P | 2.253588 | 0.03557  |
| Proteobacteria.Alphaproteobacteria.Sphingomonadales                                                                                           | P | 2.378022 | 0.000284 |
| Proteobacteria.Alphaproteobacteria.Sphingomonadales.Sphingomonadaceae                                                                         | P | 2.393832 | 0.000284 |
| Proteobacteria.Alphaproteobacteria.Sphingomonadales.Sphingomonadaceae.Sphingomonas                                                            | P | 2.398419 | 3.14E-05 |
| Proteobacteria.Alphaproteobacteria.Sphingomonadales.Sphingomonadaceae.Sphingomonas.Otu0411                                                    | P | 2.393717 | 0.000101 |
| Proteobacteria.Betaproteobacteria                                                                                                             | N | 3.533047 | 2.13E-06 |
| Proteobacteria.Betaproteobacteria.Burkholderiales                                                                                             | N | 3.688472 | 1.96E-10 |

|                                                                                                      |   |          |          |
|------------------------------------------------------------------------------------------------------|---|----------|----------|
| Proteobacteria.Betaproteobacteria.Burkholderiales.Alcaligenaceae.Alcaligenaceae_unclassified         | P | 2.36543  | 0.039978 |
| Proteobacteria.Betaproteobacteria.Burkholderiales.Alcaligenaceae.Alcaligenaceae_unclassified.Otu0320 | P | 2.392006 | 0.039978 |
| Proteobacteria.Betaproteobacteria.Burkholderiales.Burkholderiaceae.Burkholderia                      | P | 2.352729 | 0.03557  |
| Proteobacteria.Betaproteobacteria.Burkholderiales.Burkholderiaceae.Burkholderia.Otu5475              | P | 2.558869 | 0.03557  |
| Proteobacteria.Betaproteobacteria.Burkholderiales.Burkholderiales_incertae_sedis                     | N | 2.211224 | 0.031509 |
| Proteobacteria.Betaproteobacteria.Burkholderiales.Burkholderiales_incertae_sedis.Tepidimonas.Otu1749 | N | 2.135362 | 0.031509 |
| Proteobacteria.Betaproteobacteria.Burkholderiales.Comamonadaceae.Comamonadaceae_unclassified         | P | 2.561033 | 0.03557  |
| Proteobacteria.Betaproteobacteria.Burkholderiales.Comamonadaceae.Comamonadaceae_unclassified.Otu4603 | P | 2.439334 | 0.03557  |
| Proteobacteria.Betaproteobacteria.Burkholderiales.Oxalobacteraceae                                   | P | 2.314787 | 0.00341  |
| Proteobacteria.Betaproteobacteria.Burkholderiales.Oxalobacteraceae.Oxalobacter                       | P | 2.288228 | 0.002013 |
| Proteobacteria.Betaproteobacteria.Burkholderiales.Oxalobacteraceae.Oxalobacter.Otu0712               | P | 2.327092 | 0.002013 |
| Proteobacteria.Betaproteobacteria.Burkholderiales.Sutterellaceae                                     | N | 3.6902   | 2.19E-10 |
| Proteobacteria.Betaproteobacteria.Burkholderiales.Sutterellaceae.Parasutterella                      | N | 3.269824 | 1.87E-09 |
| Proteobacteria.Betaproteobacteria.Burkholderiales.Sutterellaceae.Parasutterella.Otu0028              | N | 3.243129 | 2.29E-09 |
| Proteobacteria.Betaproteobacteria.Burkholderiales.Sutterellaceae.Sutterella                          | N | 3.427336 | 0.02067  |
| Proteobacteria.Betaproteobacteria.Burkholderiales.Sutterellaceae.Sutterella.Otu4467                  | P | 2.407859 | 0.03557  |
| Proteobacteria.Betaproteobacteria.Burkholderiales.Sutterellaceae.Sutterella.Otu4934                  | P | 2.146876 | 0.03557  |
| Proteobacteria.Betaproteobacteria.Burkholderiales.Sutterellaceae.Sutterella.Otu5110                  | P | 2.637208 | 0.03557  |
| Proteobacteria.Betaproteobacteria.Burkholderiales.Sutterellaceae.Sutterella.Otu5804                  | P | 2.536346 | 0.03557  |
| Proteobacteria.Betaproteobacteria.Burkholderiales.Sutterellaceae.Sutterella.Otu6629                  | P | 2.549275 | 0.03557  |
| Proteobacteria.Betaproteobacteria.Burkholderiales.Sutterellaceae.Sutterella.Otu6969                  | P | 2.111905 | 0.002926 |
| Proteobacteria.Betaproteobacteria.Burkholderiales.Sutterellaceae.Sutterella.Otu7216                  | P | 2.596655 | 0.03557  |
| Proteobacteria.Betaproteobacteria.Methylophilales                                                    | P | 2.167405 | 0.03557  |
| Proteobacteria.Betaproteobacteria.Methylophilales.Methylophilaceae                                   | P | 2.380935 | 0.03557  |
| Proteobacteria.Betaproteobacteria.Methylophilales.Methylophilaceae.Methylophilus                     | P | 2.406777 | 0.03557  |
| Proteobacteria.Betaproteobacteria.Methylophilales.Methylophilaceae.Methylophilus.Otu7233             | P | 2.510542 | 0.03557  |
| Proteobacteria.Betaproteobacteria.Neisseriales                                                       | P | 3.177386 | 0.003012 |
| Proteobacteria.Betaproteobacteria.Neisseriales.Neisseriaceae                                         | P | 3.159134 | 0.003012 |
| Proteobacteria.Betaproteobacteria.Neisseriales.Neisseriaceae.Eikenella                               | P | 2.628969 | 0.002793 |
| Proteobacteria.Betaproteobacteria.Neisseriales.Neisseriaceae.Eikenella.Otu0288                       | P | 2.615909 | 0.002793 |
| Proteobacteria.Betaproteobacteria.Neisseriales.Neisseriaceae.Eikenella.Otu6140                       | P | 2.610457 | 0.03557  |
| Proteobacteria.Betaproteobacteria.Neisseriales.Neisseriaceae.Eikenella.Otu6568                       | P | 2.333256 | 0.03557  |

|                                                                                                 |   |          |          |
|-------------------------------------------------------------------------------------------------|---|----------|----------|
| Proteobacteria.Betaproteobacteria.Neisseriales.Neisseriaceae.Neisseria                          | P | 3.037947 | 0.017965 |
| Proteobacteria.Betaproteobacteria.Neisseriales.Neisseriaceae.Neisseria.Otu0162                  | P | 3.016513 | 0.021823 |
| Proteobacteria.Deltaproteobacteria                                                              | N | 2.825968 | 1.41E-10 |
| Proteobacteria.Deltaproteobacteria.Bdellovibrionales.Bacteriovoraceae                           | P | 2.301322 | 0.03557  |
| Proteobacteria.Deltaproteobacteria.Bdellovibrionales.Bacteriovoraceae.Peredibacter              | P | 2.617674 | 0.03557  |
| Proteobacteria.Deltaproteobacteria.Bdellovibrionales.Bacteriovoraceae.Peredibacter.Otu4697      | P | 2.288183 | 0.03557  |
| Proteobacteria.Deltaproteobacteria.Desulfovibrionales                                           | N | 2.796063 | 7.44E-11 |
| Proteobacteria.Deltaproteobacteria.Desulfovibrionales.Desulfovibrionaceae                       | N | 2.749284 | 2.62E-10 |
| Proteobacteria.Deltaproteobacteria.Desulfovibrionales.Desulfovibrionaceae.Bilophila             | N | 2.654933 | 1.27E-09 |
| Proteobacteria.Deltaproteobacteria.Desulfovibrionales.Desulfovibrionaceae.Bilophila.Otu0097     | N | 2.644006 | 2.29E-09 |
| Proteobacteria.Deltaproteobacteria.Desulfovibrionales.Desulfovibrionaceae.Bilophila.Otu6025     | P | 2.422381 | 0.03557  |
| Proteobacteria.Deltaproteobacteria.Desulfovibrionales.Desulfovibrionaceae.Desulfovibrio         | N | 2.079726 | 0.000566 |
| Proteobacteria.Deltaproteobacteria.Desulfovibrionales.Desulfovibrionaceae.Desulfovibrio.Otu0309 | N | 2.048282 | 0.000193 |
| Proteobacteria.Epsilonproteobacteria.Campylobacterales.Campylobacteraceae.Campylobacter.Otu3615 | P | 2.32394  | 0.03557  |
| Proteobacteria.Epsilonproteobacteria.Campylobacterales.Campylobacteraceae.Campylobacter.Otu4138 | P | 2.294081 | 0.03557  |
| Proteobacteria.Epsilonproteobacteria.Campylobacterales.Campylobacteraceae.Campylobacter.Otu4984 | P | 2.464109 | 0.03557  |
| Proteobacteria.Gammaproteobacteria                                                              | P | 5.359334 | 3.27E-48 |
| Proteobacteria.Gammaproteobacteria.Aeromonadales.Aeromonadaceae.Aeromonas.Otu1240               | P | 2.001431 | 0.002926 |
| Proteobacteria.Gammaproteobacteria.Aeromonadales.Aeromonadaceae.Aeromonas.Otu4542               | P | 2.525496 | 0.03557  |
| Proteobacteria.Gammaproteobacteria.Aeromonadales.Aeromonadaceae.Aeromonas.Otu5797               | P | 2.539359 | 0.03557  |
| Proteobacteria.Gammaproteobacteria.Aeromonadales.Succinivibrionaceae.Succinatimonas.Otu4172     | P | 2.323722 | 0.03557  |
| Proteobacteria.Gammaproteobacteria.Aeromonadales.Succinivibrionaceae.Succinatimonas.Otu5859     | P | 2.495797 | 0.03557  |
| Proteobacteria.Gammaproteobacteria.Aeromonadales.Succinivibrionaceae.Succinatimonas.Otu6280     | P | 2.334621 | 0.03557  |
| Proteobacteria.Gammaproteobacteria.Alteromonadales.Alteromonadaceae.Alishewanella               | P | 2.303936 | 0.03557  |
| Proteobacteria.Gammaproteobacteria.Alteromonadales.Alteromonadaceae.Alishewanella.Otu2203       | P | 2.395861 | 0.03557  |
| Proteobacteria.Gammaproteobacteria.Chromatiales                                                 | P | 2.483574 | 0.03557  |
| Proteobacteria.Gammaproteobacteria.Chromatiales.Chromatiaceae                                   | P | 2.516479 | 0.03557  |
| Proteobacteria.Gammaproteobacteria.Chromatiales.Chromatiaceae.Rheinheimera                      | P | 2.270244 | 0.03557  |
| Proteobacteria.Gammaproteobacteria.Chromatiales.Chromatiaceae.Rheinheimera.Otu4540              | P | 2.327604 | 0.03557  |
| Proteobacteria.Gammaproteobacteria.Enterobacteriales                                            | P | 5.301362 | 1.14E-38 |
| Proteobacteria.Gammaproteobacteria.Enterobacteriales.Enterobacteriaceae                         | P | 5.301362 | 1.14E-38 |
| Proteobacteria.Gammaproteobacteria.Enterobacteriales.Enterobacteriaceae.Enterobacter            | P | 4.817627 | 3.4E-16  |

|                                                                                                                 |   |          |          |
|-----------------------------------------------------------------------------------------------------------------|---|----------|----------|
| Proteobacteria.Gammaproteobacteria.Enterobacteriales.Enterobacteriaceae.Enterobacter.Otu0006                    | P | 4.816932 | 2.91E-16 |
| Proteobacteria.Gammaproteobacteria.Enterobacteriales.Enterobacteriaceae.Enterobacteriaceae_unclassified         | P | 3.294698 | 4.36E-24 |
| Proteobacteria.Gammaproteobacteria.Enterobacteriales.Enterobacteriaceae.Enterobacteriaceae_unclassified.Otu0253 | P | 2.90962  | 1.5E-24  |
| Proteobacteria.Gammaproteobacteria.Enterobacteriales.Enterobacteriaceae.Enterobacteriaceae_unclassified.Otu0372 | P | 3.004201 | 0.039891 |
| Proteobacteria.Gammaproteobacteria.Enterobacteriales.Enterobacteriaceae.Enterobacteriaceae_unclassified.Otu2850 | P | 2.188071 | 0.002926 |
| Proteobacteria.Gammaproteobacteria.Enterobacteriales.Enterobacteriaceae.Enterobacteriaceae_unclassified.Otu3084 | P | 2.250869 | 0.03557  |
| Proteobacteria.Gammaproteobacteria.Enterobacteriales.Enterobacteriaceae.Enterobacteriaceae_unclassified.Otu3649 | P | 2.587261 | 0.03557  |
| Proteobacteria.Gammaproteobacteria.Enterobacteriales.Enterobacteriaceae.Enterobacteriaceae_unclassified.Otu3661 | P | 2.407781 | 0.03557  |
| Proteobacteria.Gammaproteobacteria.Enterobacteriales.Enterobacteriaceae.Enterobacteriaceae_unclassified.Otu3805 | P | 2.060686 | 0.002926 |
| Proteobacteria.Gammaproteobacteria.Enterobacteriales.Enterobacteriaceae.Enterobacteriaceae_unclassified.Otu3997 | P | 2.718547 | 0.03557  |
| Proteobacteria.Gammaproteobacteria.Enterobacteriales.Enterobacteriaceae.Enterobacteriaceae_unclassified.Otu4088 | P | 2.154319 | 0.002926 |
| Proteobacteria.Gammaproteobacteria.Enterobacteriales.Enterobacteriaceae.Enterobacteriaceae_unclassified.Otu4123 | P | 2.643966 | 0.03557  |
| Proteobacteria.Gammaproteobacteria.Enterobacteriales.Enterobacteriaceae.Enterobacteriaceae_unclassified.Otu4347 | P | 2.612567 | 0.03557  |
| Proteobacteria.Gammaproteobacteria.Enterobacteriales.Enterobacteriaceae.Enterobacteriaceae_unclassified.Otu4482 | P | 2.430658 | 0.03557  |
| Proteobacteria.Gammaproteobacteria.Enterobacteriales.Enterobacteriaceae.Enterobacteriaceae_unclassified.Otu4628 | P | 2.787841 | 0.03557  |
| Proteobacteria.Gammaproteobacteria.Enterobacteriales.Enterobacteriaceae.Enterobacteriaceae_unclassified.Otu4728 | P | 2.365449 | 0.03557  |
| Proteobacteria.Gammaproteobacteria.Enterobacteriales.Enterobacteriaceae.Enterobacteriaceae_unclassified.Otu4795 | P | 2.550235 | 0.03557  |
| Proteobacteria.Gammaproteobacteria.Enterobacteriales.Enterobacteriaceae.Enterobacteriaceae_unclassified.Otu5039 | P | 2.252896 | 0.03557  |
| Proteobacteria.Gammaproteobacteria.Enterobacteriales.Enterobacteriaceae.Enterobacteriaceae_unclassified.Otu5139 | P | 2.264045 | 0.03557  |
| Proteobacteria.Gammaproteobacteria.Enterobacteriales.Enterobacteriaceae.Enterobacteriaceae_unclassified.Otu5382 | P | 2.370363 | 0.03557  |
| Proteobacteria.Gammaproteobacteria.Enterobacteriales.Enterobacteriaceae.Enterobacteriaceae_unclassified.Otu5476 | P | 2.183803 | 0.03557  |
| Proteobacteria.Gammaproteobacteria.Enterobacteriales.Enterobacteriaceae.Enterobacteriaceae_unclassified.Otu6015 | P | 2.453535 | 0.03557  |
| Proteobacteria.Gammaproteobacteria.Enterobacteriales.Enterobacteriaceae.Enterobacteriaceae_unclassified.Otu6255 | P | 2.358716 | 0.03557  |
| Proteobacteria.Gammaproteobacteria.Enterobacteriales.Enterobacteriaceae.Enterobacteriaceae_unclassified.Otu6362 | P | 2.389493 | 0.03557  |
| Proteobacteria.Gammaproteobacteria.Enterobacteriales.Enterobacteriaceae.Enterobacteriaceae_unclassified.Otu6393 | P | 2.267087 | 0.03557  |
| Proteobacteria.Gammaproteobacteria.Enterobacteriales.Enterobacteriaceae.Enterobacteriaceae_unclassified.Otu6412 | P | 2.409003 | 0.03557  |
| Proteobacteria.Gammaproteobacteria.Enterobacteriales.Enterobacteriaceae.Enterobacteriaceae_unclassified.Otu6796 | P | 2.43401  | 0.03557  |
| Proteobacteria.Gammaproteobacteria.Enterobacteriales.Enterobacteriaceae.Enterobacteriaceae_unclassified.Otu6852 | P | 2.411768 | 0.03557  |
| Proteobacteria.Gammaproteobacteria.Enterobacteriales.Enterobacteriaceae.Enterobacteriaceae_unclassified.Otu6930 | P | 2.176371 | 0.03557  |
| Proteobacteria.Gammaproteobacteria.Enterobacteriales.Enterobacteriaceae.Escherichia_Shigella                    | P | 5.103562 | 2.57E-23 |
| Proteobacteria.Gammaproteobacteria.Enterobacteriales.Enterobacteriaceae.Escherichia_Shigella.Otu0002            | P | 5.102709 | 2.29E-23 |
| Proteobacteria.Gammaproteobacteria.Enterobacteriales.Enterobacteriaceae.Escherichia_Shigella.Otu0228            | P | 2.239215 | 0.00265  |



|                                                                                                                                               |   |          |          |
|-----------------------------------------------------------------------------------------------------------------------------------------------|---|----------|----------|
| Proteobacteria.Gammaproteobacteria.Enterobacteriales.Enterobacteriaceae.Escherichia_Shigella.Otu2853                                          | P | 2.42877  | 0.03557  |
| Proteobacteria.Gammaproteobacteria.Enterobacteriales.Enterobacteriaceae.Escherichia_Shigella.Otu4490                                          | P | 2.428513 | 0.03557  |
| Proteobacteria.Gammaproteobacteria.Enterobacteriales.Enterobacteriaceae.Escherichia_Shigella.Otu4876                                          | P | 2.556689 | 0.03557  |
| Proteobacteria.Gammaproteobacteria.Enterobacteriales.Enterobacteriaceae.Escherichia_Shigella.Otu5223                                          | P | 2.628083 | 0.03557  |
| Proteobacteria.Gammaproteobacteria.Enterobacteriales.Enterobacteriaceae.Escherichia_Shigella.Otu5257                                          | P | 2.318015 | 0.03557  |
| Proteobacteria.Gammaproteobacteria.Enterobacteriales.Enterobacteriaceae.Escherichia_Shigella.Otu5474                                          | P | 2.641203 | 0.03557  |
| Proteobacteria.Gammaproteobacteria.Enterobacteriales.Enterobacteriaceae.Escherichia_Shigella.Otu5700                                          | P | 2.465324 | 0.03557  |
| Proteobacteria.Gammaproteobacteria.Enterobacteriales.Enterobacteriaceae.Escherichia_Shigella.Otu6400                                          | P | 2.173159 | 0.03557  |
| Proteobacteria.Gammaproteobacteria.Enterobacteriales.Enterobacteriaceae.Escherichia_Shigella.Otu6405                                          | P | 2.52552  | 0.03557  |
| Proteobacteria.Gammaproteobacteria.Enterobacteriales.Enterobacteriaceae.Escherichia_Shigella.Otu6699                                          | P | 2.65307  | 0.03557  |
| Proteobacteria.Gammaproteobacteria.Enterobacteriales.Enterobacteriaceae.Morganella                                                            | P | 3.422344 | 0.008104 |
| Proteobacteria.Gammaproteobacteria.Enterobacteriales.Enterobacteriaceae.Morganella.Otu0086                                                    | P | 3.427451 | 0.008104 |
| Proteobacteria.Gammaproteobacteria.Enterobacteriales.Enterobacteriaceae.Morganella.Otu7234                                                    | P | 2.490169 | 0.03557  |
| Proteobacteria.Gammaproteobacteria.Enterobacteriales.Enterobacteriaceae.Proteus                                                               | P | 3.422889 | 0.000303 |
| Proteobacteria.Gammaproteobacteria.Enterobacteriales.Enterobacteriaceae.Proteus.Otu0058                                                       | P | 3.418936 | 0.000303 |
| Proteobacteria.Gammaproteobacteria.Enterobacteriales.Enterobacteriaceae.Proteus.Otu1884                                                       | P | 2.393037 | 0.03557  |
| Proteobacteria.Gammaproteobacteria.Enterobacteriales.Enterobacteriaceae.Proteus.Otu2417                                                       | P | 2.04295  | 0.030565 |
| Proteobacteria.Gammaproteobacteria.Enterobacteriales.Enterobacteriaceae.Proteus.Otu3763                                                       | P | 2.398993 | 0.03557  |
| Proteobacteria.Gammaproteobacteria.Enterobacteriales.Enterobacteriaceae.Proteus.Otu4477                                                       | P | 2.494135 | 0.03557  |
| Proteobacteria.Gammaproteobacteria.Enterobacteriales.Enterobacteriaceae.Proteus.Otu5809                                                       | P | 2.599233 | 0.03557  |
| Proteobacteria.Gammaproteobacteria.Enterobacteriales.Enterobacteriaceae.Proteus.Otu5959                                                       | P | 2.549232 | 0.03557  |
| Proteobacteria.Gammaproteobacteria.Gammaproteobacteria_unclassified.Gammaproteobacteria_unclassified.Gammaproteobacteria_unclassified.Otu3465 | P | 2.518888 | 0.03557  |
| Proteobacteria.Gammaproteobacteria.Gammaproteobacteria_unclassified.Gammaproteobacteria_unclassified.Gammaproteobacteria_unclassified.Otu4197 | P | 2.549641 | 0.03557  |
| Proteobacteria.Gammaproteobacteria.Gammaproteobacteria_unclassified.Gammaproteobacteria_unclassified.Gammaproteobacteria_unclassified.Otu4579 | P | 2.035739 | 0.03557  |
| Proteobacteria.Gammaproteobacteria.Gammaproteobacteria_unclassified.Gammaproteobacteria_unclassified.Gammaproteobacteria_unclassified.Otu4767 | P | 2.755648 | 0.03557  |
| Proteobacteria.Gammaproteobacteria.Gammaproteobacteria_unclassified.Gammaproteobacteria_unclassified.Gammaproteobacteria_unclassified.Otu4895 | P | 2.46481  | 0.03557  |
| Proteobacteria.Gammaproteobacteria.Gammaproteobacteria_unclassified.Gammaproteobacteria_unclassified.Gammaproteobacteria_unclassified.Otu6093 | P | 2.527669 | 0.03557  |
| Proteobacteria.Gammaproteobacteria.Pasteurellales                                                                                             | P | 4.085783 | 0.026586 |
| Proteobacteria.Gammaproteobacteria.Pasteurellales.Pasteurellaceae                                                                             | P | 4.085783 | 0.026586 |
| Proteobacteria.Gammaproteobacteria.Pasteurellales.Pasteurellaceae.Haemophilus                                                                 | P | 3.314158 | 0.00061  |
| Proteobacteria.Gammaproteobacteria.Pasteurellales.Pasteurellaceae.Haemophilus.Otu0130                                                         | P | 3.320212 | 0.000796 |
| Proteobacteria.Gammaproteobacteria.Pasteurellales.Pasteurellaceae.Haemophilus.Otu3221                                                         | P | 2.275693 | 0.031509 |

|                                                                                                           |   |          |          |
|-----------------------------------------------------------------------------------------------------------|---|----------|----------|
| Proteobacteria.Gammaproteobacteria.Pasteurellales.Pasteurellaceae.Haemophilus.Otu3767                     | P | 2.866418 | 0.03557  |
| Proteobacteria.Gammaproteobacteria.Pasteurellales.Pasteurellaceae.Haemophilus.Otu4307                     | P | 2.31283  | 0.03557  |
| Proteobacteria.Gammaproteobacteria.Pasteurellales.Pasteurellaceae.Haemophilus.Otu6077                     | P | 2.538376 | 0.03557  |
| Proteobacteria.Gammaproteobacteria.Pasteurellales.Pasteurellaceae.Haemophilus.Otu6659                     | P | 2.402792 | 0.03557  |
| Proteobacteria.Gammaproteobacteria.Pasteurellales.Pasteurellaceae.Pasteurellaceae_unclassified.Otu4565    | P | 2.567659 | 0.03557  |
| Proteobacteria.Gammaproteobacteria.Pasteurellales.Pasteurellaceae.Pasteurellaceae_unclassified.Otu5017    | P | 2.372498 | 0.03557  |
| Proteobacteria.Gammaproteobacteria.Pasteurellales.Pasteurellaceae.Pasteurellaceae_unclassified.Otu5992    | P | 2.440301 | 0.03557  |
| Proteobacteria.Gammaproteobacteria.Pasteurellales.Pasteurellaceae.Pasteurellaceae_unclassified.Otu6582    | P | 2.130649 | 0.03557  |
| Proteobacteria.Gammaproteobacteria.Pseudomonadales                                                        | P | 3.858651 | 0.003651 |
| Proteobacteria.Gammaproteobacteria.Pseudomonadales.Moraxellaceae                                          | P | 2.494967 | 0.000592 |
| Proteobacteria.Gammaproteobacteria.Pseudomonadales.Moraxellaceae.Acinetobacter                            | P | 2.437651 | 0.003512 |
| Proteobacteria.Gammaproteobacteria.Pseudomonadales.Moraxellaceae.Acinetobacter.Otu0620                    | P | 2.449528 | 0.000192 |
| Proteobacteria.Gammaproteobacteria.Pseudomonadales.Pseudomonadaceae                                       | P | 3.89146  | 0.019706 |
| Proteobacteria.Gammaproteobacteria.Pseudomonadales.Pseudomonadaceae.Pseudomonadaceae_unclassified.Otu4469 | P | 2.293922 | 0.03557  |
| Proteobacteria.Gammaproteobacteria.Pseudomonadales.Pseudomonadaceae.Pseudomonadaceae_unclassified.Otu6501 | P | 2.360873 | 0.03557  |
| Proteobacteria.Gammaproteobacteria.Pseudomonadales.Pseudomonadaceae.Pseudomonas                           | P | 3.884915 | 0.014036 |
| Proteobacteria.Gammaproteobacteria.Pseudomonadales.Pseudomonadaceae.Pseudomonas.Otu0455                   | P | 2.260235 | 0.004047 |
| Proteobacteria.Gammaproteobacteria.Pseudomonadales.Pseudomonadaceae.Pseudomonas.Otu4633                   | P | 2.357126 | 0.002926 |
| Proteobacteria.Gammaproteobacteria.Vibrionales.Vibrionaceae.Photobacterium.Otu3910                        | P | 2.348619 | 0.03557  |
| Proteobacteria.Gammaproteobacteria.Xanthomonadales.Xanthomonadaceae.Luteimonas.Otu5006                    | P | 2.535717 | 0.03557  |
| Proteobacteria.Gammaproteobacteria.Xanthomonadales.Xanthomonadaceae.Stenotrophomonas.Otu3493              | P | 2.69631  | 0.03557  |
| Proteobacteria.Gammaproteobacteria.Xanthomonadales.Xanthomonadaceae.Stenotrophomonas.Otu5592              | P | 2.502213 | 0.03557  |
| Tenericutes.Mollicutes.Mycoplasmatales.Mycoplasmataceae.Mycoplasma.Otu5320                                | P | 2.431214 | 0.03557  |
| Verrucomicrobia                                                                                           | N | 3.826575 | 2.51E-05 |
| Verrucomicrobia.Verrucomicrobiae                                                                          | N | 3.823555 | 8.84E-05 |
| Verrucomicrobia.Verrucomicrobiae.Verrucomicrobiales                                                       | N | 3.823555 | 8.84E-05 |
| Verrucomicrobia.Verrucomicrobiae.Verrucomicrobiales.Verrucomicrobiaceae                                   | N | 3.823555 | 8.84E-05 |
| Verrucomicrobia.Verrucomicrobiae.Verrucomicrobiales.Verrucomicrobiaceae.Akkermansia                       | N | 3.823555 | 8.84E-05 |
| Verrucomicrobia.Verrucomicrobiae.Verrucomicrobiales.Verrucomicrobiaceae.Akkermansia.Otu0031               | N | 3.539659 | 0.026002 |

**Table S2**

**PICRUSt-predicted pathways (KEGG Level 3) found to be uniquely enriched in microbiota data for specific stool colour following comparison with brown faecal samples.** A range of other pathways were found to be commonly enriched when different stool colours were compared to brown stool.

| <b>Stool colour</b> | <b>KEGG Pathway</b>                                                                                                                                                                                                                                                |
|---------------------|--------------------------------------------------------------------------------------------------------------------------------------------------------------------------------------------------------------------------------------------------------------------|
| Black               | Lipid biosynthesis proteins                                                                                                                                                                                                                                        |
| Yellow              | Cell cycle: Caulobacter<br>DNA replication proteins<br>Glycolysis / Gluconeogenesis<br>Lipopolysaccharide biosynthesis proteins<br>Geraniol degradation<br>Membrane and intracellular structural molecules<br>Other ion coupled transporters<br>Pores ion channels |
| White               | DNA replication<br>Cysteine and methionine metabolism<br>Flavone and flavonol biosynthesis<br>Stilbenoid diarylheptanoid and gingerol biosynthesis<br>Biosynthesis of ansamycins<br>Ethylbenzene degradation<br>Translation proteins                               |
| Red                 | Notch signaling pathway<br>Wnt signaling pathway<br>Base excision repair<br>Glycine serine and threonine metabolism<br>Glycerolipid metabolism                                                                                                                     |
| Colourless          | Bacterial invasion of epithelial cells<br>C5 Branched dibasic acid metabolism<br>Pentose phosphate pathway<br>Steroid hormone biosynthesis                                                                                                                         |

|       |                                                                                                                                                                                                                                                                                                                                                                                                                                                                                                                                                  |
|-------|--------------------------------------------------------------------------------------------------------------------------------------------------------------------------------------------------------------------------------------------------------------------------------------------------------------------------------------------------------------------------------------------------------------------------------------------------------------------------------------------------------------------------------------------------|
|       | <p>Biosynthesis of vancomycin group antibiotics<br/> Carotenoid biosynthesis<br/> Polycyclic aromatic hydrocarbon degradation<br/> Digestive System<br/> PPAR signaling pathway<br/> Biosynthesis and biodegradation of secondary metabolites</p>                                                                                                                                                                                                                                                                                                |
| Green | <p>Phenylalanine metabolism<br/> Glyoxylate and dicarboxylate metabolism<br/> Pyruvate metabolism<br/> Nitrogen metabolism<br/> Fatty acid biosynthesis<br/> Porphyrin and chlorophyll metabolism<br/> Retinol metabolism<br/> Vitamin B6 metabolism<br/> D-Alanine metabolism<br/> Tetracycline biosynthesis<br/> Aminobenzoate degradation<br/> Drug metabolism cytochrome P450<br/> Drug metabolism other enzymes<br/> Metabolism of xenobiotics by cytochrome P450<br/> NOD like receptor signaling pathway<br/> Carbohydrate metabolism</p> |

**Table S3**

**Bacterial taxa enriched in bacterial or viral acute gastroenteritis cases.** Analysis was performed using LEfSe. BAC: enriched in bacterial acute gastroenteritis; VIR: enriched in viral acute gastroenteritis.

| <b>Microbial Taxa</b>                                                                                                 | <b>Group</b> | <b>LDA Score</b> | <b>P-value</b> |
|-----------------------------------------------------------------------------------------------------------------------|--------------|------------------|----------------|
| Actinobacteria                                                                                                        | VIR          | 3.819957         | 0.042385       |
| Actinobacteria.Actinobacteria                                                                                         | VIR          | 3.819957         | 0.042385       |
| Actinobacteria.Actinobacteria.Actinomycetales                                                                         | BAC          | 3.086093         | 0.049478       |
| Actinobacteria.Actinobacteria.Actinomycetales.Actinomycetaceae                                                        | BAC          | 2.962643         | 0.019651       |
| Actinobacteria.Actinobacteria.Actinomycetales.Actinomycetaceae.Actinomyces                                            | BAC          | 2.952841         | 0.026711       |
| Actinobacteria.Actinobacteria.Bifidobacteriales                                                                       | VIR          | 3.790115         | 0.017854       |
| Actinobacteria.Actinobacteria.Bifidobacteriales.Bifidobacteriaceae                                                    | VIR          | 3.790115         | 0.017854       |
| Actinobacteria.Actinobacteria.Bifidobacteriales.Bifidobacteriaceae.Bifidobacterium                                    | VIR          | 3.789649         | 0.016236       |
| Actinobacteria.Actinobacteria.Bifidobacteriales.Bifidobacteriaceae.Bifidobacterium.Otu0013                            | VIR          | 3.779967         | 0.014218       |
| Actinobacteria.Actinobacteria.Coriobacteriales                                                                        | VIR          | 3.181984         | 0.024339       |
| Actinobacteria.Actinobacteria.Coriobacteriales.Coriobacteriaceae                                                      | VIR          | 3.181984         | 0.024339       |
| Actinobacteria.Actinobacteria.Coriobacteriales.Coriobacteriaceae.Asaccharobacter                                      | VIR          | 2.15698          | 0.021881       |
| Actinobacteria.Actinobacteria.Coriobacteriales.Coriobacteriaceae.Asaccharobacter.Otu0589                              | VIR          | 2.107921         | 0.04772        |
| Actinobacteria.Actinobacteria.Coriobacteriales.Coriobacteriaceae.Collinsella                                          | VIR          | 3.227099         | 0.000196       |
| Actinobacteria.Actinobacteria.Coriobacteriales.Coriobacteriaceae.Collinsella.Otu0088                                  | VIR          | 3.223773         | 0.000185       |
| Bacteria_unclassified                                                                                                 | BAC          | 3.097851         | 0.032611       |
| Bacteria_unclassified.Bacteria_unclassified                                                                           | BAC          | 3.097851         | 0.032611       |
| Bacteria_unclassified.Bacteria_unclassified.Bacteria_unclassified                                                     | BAC          | 3.097851         | 0.032611       |
| Bacteria_unclassified.Bacteria_unclassified.Bacteria_unclassified.Bacteria_unclassified                               | BAC          | 3.097851         | 0.032611       |
| Bacteria_unclassified.Bacteria_unclassified.Bacteria_unclassified.Bacteria_unclassified.Bacteria_unclassified         | BAC          | 3.097851         | 0.032611       |
| Bacteria_unclassified.Bacteria_unclassified.Bacteria_unclassified.Bacteria_unclassified.Bacteria_unclassified.Otu0073 | BAC          | 2.992939         | 0.000345       |
| Bacteria_unclassified.Bacteria_unclassified.Bacteria_unclassified.Bacteria_unclassified.Bacteria_unclassified.Otu0096 | VIR          | 2.098758         | 0.009545       |
| Bacteroidetes                                                                                                         | VIR          | 4.673476         | 0.03476        |
| Bacteroidetes.Bacteroidia                                                                                             | VIR          | 4.691831         | 0.027511       |
| Bacteroidetes.Bacteroidia.Bacteroidales                                                                               | VIR          | 4.691831         | 0.027511       |

|                                                                                                       |     |          |          |
|-------------------------------------------------------------------------------------------------------|-----|----------|----------|
| Bacteroidetes.Bacteroidia.Bacteroidales.Bacteroidaceae.Bacteroides.Otu0001                            | VIR | 4.383742 | 0.008424 |
| Bacteroidetes.Bacteroidia.Bacteroidales.Bacteroidaceae.Bacteroides.Otu0010                            | VIR | 3.898617 | 0.022255 |
| Bacteroidetes.Bacteroidia.Bacteroidales.Bacteroidaceae.Bacteroides.Otu0020                            | VIR | 3.78897  | 0.01851  |
| Bacteroidetes.Bacteroidia.Bacteroidales.Bacteroidaceae.Bacteroides.Otu0030                            | VIR | 3.490538 | 0.002154 |
| Bacteroidetes.Bacteroidia.Bacteroidales.Bacteroidaceae.Bacteroides.Otu0158                            | VIR | 2.696595 | 0.000914 |
| Bacteroidetes.Bacteroidia.Bacteroidales.Bacteroidaceae.Bacteroides.Otu0193                            | VIR | 2.539525 | 0.014982 |
| Bacteroidetes.Bacteroidia.Bacteroidales.Bacteroidaceae.Bacteroides.Otu0201                            | VIR | 2.126747 | 0.049803 |
| Bacteroidetes.Bacteroidia.Bacteroidales.Bacteroidaceae.Bacteroides.Otu0210                            | VIR | 2.525164 | 0.027231 |
| Bacteroidetes.Bacteroidia.Bacteroidales.Bacteroidaceae.Bacteroides.Otu0214                            | VIR | 2.253262 | 0.03293  |
| Bacteroidetes.Bacteroidia.Bacteroidales.Bacteroidaceae.Bacteroides.Otu0242                            | VIR | 2.344592 | 0.001563 |
| Bacteroidetes.Bacteroidia.Bacteroidales.Bacteroidaceae.Bacteroides.Otu0243                            | VIR | 2.544283 | 0.004986 |
| Bacteroidetes.Bacteroidia.Bacteroidales.Bacteroidaceae.Bacteroides.Otu0300                            | VIR | 2.208003 | 0.015586 |
| Bacteroidetes.Bacteroidia.Bacteroidales.Bacteroidaceae.Bacteroides.Otu0322                            | VIR | 2.527519 | 0.00195  |
| Bacteroidetes.Bacteroidia.Bacteroidales.Bacteroidaceae.Bacteroides.Otu0378                            | VIR | 2.121595 | 0.006958 |
| Bacteroidetes.Bacteroidia.Bacteroidales.Bacteroidaceae.Bacteroides.Otu0404                            | VIR | 2.476947 | 0.023733 |
| Bacteroidetes.Bacteroidia.Bacteroidales.Bacteroidaceae.Bacteroides.Otu0420                            | VIR | 2.084469 | 0.0107   |
| Bacteroidetes.Bacteroidia.Bacteroidales.Bacteroidaceae.Bacteroides.Otu0445                            | VIR | 2.304637 | 0.000203 |
| Bacteroidetes.Bacteroidia.Bacteroidales.Bacteroidaceae.Bacteroides.Otu0538                            | BAC | 2.131119 | 0.022546 |
| Bacteroidetes.Bacteroidia.Bacteroidales.Bacteroidaceae.Bacteroides.Otu0649                            | VIR | 2.219085 | 0.011817 |
| Bacteroidetes.Bacteroidia.Bacteroidales.Bacteroidaceae.Bacteroides.Otu0653                            | BAC | 3.062748 | 0.013905 |
| Bacteroidetes.Bacteroidia.Bacteroidales.Bacteroidaceae.Bacteroides.Otu0731                            | VIR | 2.103121 | 0.046143 |
| Bacteroidetes.Bacteroidia.Bacteroidales.Bacteroidaceae.Bacteroides.Otu0789                            | VIR | 2.033064 | 0.006472 |
| Bacteroidetes.Bacteroidia.Bacteroidales.Bacteroidaceae.Bacteroides.Otu0838                            | VIR | 2.24246  | 0.04772  |
| Bacteroidetes.Bacteroidia.Bacteroidales.Bacteroidaceae.Bacteroides.Otu0857                            | VIR | 2.622492 | 0.008365 |
| Bacteroidetes.Bacteroidia.Bacteroidales.Bacteroidaceae.Bacteroides.Otu0930                            | VIR | 2.337439 | 0.016957 |
| Bacteroidetes.Bacteroidia.Bacteroidales.Bacteroidaceae.Bacteroides.Otu1029                            | VIR | 2.847424 | 0.023351 |
| Bacteroidetes.Bacteroidia.Bacteroidales.Bacteroidaceae.Bacteroides.Otu1046                            | VIR | 2.519428 | 0.04081  |
| Bacteroidetes.Bacteroidia.Bacteroidales.Bacteroidaceae.Bacteroides.Otu1192                            | VIR | 2.462371 | 0.023351 |
| Bacteroidetes.Bacteroidia.Bacteroidales.Bacteroidaceae.Bacteroides.Otu1273                            | VIR | 2.486582 | 0.023351 |
| Bacteroidetes.Bacteroidia.Bacteroidales.Bacteroidaceae.Bacteroides.Otu1941                            | VIR | 2.992537 | 0.023351 |
| Bacteroidetes.Bacteroidia.Bacteroidales.Bacteroidales_unclassified.Bacteroidales_unclassified.Otu0884 | VIR | 2.261603 | 0.028114 |
| Bacteroidetes.Bacteroidia.Bacteroidales.Porphyrimonadaceae                                            | VIR | 4.179259 | 0.001466 |

|                                                                                                    |     |          |          |
|----------------------------------------------------------------------------------------------------|-----|----------|----------|
| Bacteroidetes.Bacteroidia.Bacteroidales.Porphyromonadaceae.Barnesiella                             | VIR | 3.958317 | 0.005016 |
| Bacteroidetes.Bacteroidia.Bacteroidales.Porphyromonadaceae.Butyricimonas.Otu0070                   | VIR | 3.190242 | 0.048783 |
| Bacteroidetes.Bacteroidia.Bacteroidales.Porphyromonadaceae.Odoribacter                             | VIR | 3.418337 | 0.031845 |
| Bacteroidetes.Bacteroidia.Bacteroidales.Porphyromonadaceae.Odoribacter.Otu0043                     | VIR | 3.428519 | 0.013421 |
| Bacteroidetes.Bacteroidia.Bacteroidales.Porphyromonadaceae.Parabacteroides                         | VIR | 3.60135  | 0.007061 |
| Bacteroidetes.Bacteroidia.Bacteroidales.Porphyromonadaceae.Parabacteroides.Otu0019                 | VIR | 3.420619 | 0.000773 |
| Bacteroidetes.Bacteroidia.Bacteroidales.Porphyromonadaceae.Parabacteroides.Otu0022                 | VIR | 3.313753 | 0.016722 |
| Bacteroidetes.Bacteroidia.Bacteroidales.Porphyromonadaceae.Parabacteroides.Otu0492                 | VIR | 2.446295 | 0.023351 |
| Bacteroidetes.Bacteroidia.Bacteroidales.Porphyromonadaceae.Porphyromonadaceae_unclassified.Otu0150 | VIR | 3.092866 | 0.01148  |
| Bacteroidetes.Bacteroidia.Bacteroidales.Porphyromonadaceae.Porphyromonadaceae_unclassified.Otu0696 | VIR | 2.185798 | 0.01576  |
| Bacteroidetes.Bacteroidia.Bacteroidales.Prevotellaceae.Prevotella.Otu0316                          | BAC | 2.557841 | 0.021315 |
| Bacteroidetes.Bacteroidia.Bacteroidales.Rikenellaceae                                              | VIR | 4.260758 | 0.000378 |
| Bacteroidetes.Bacteroidia.Bacteroidales.Rikenellaceae.Alistipes                                    | VIR | 4.262887 | 0.000302 |
| Bacteroidetes.Bacteroidia.Bacteroidales.Rikenellaceae.Alistipes.Otu0015                            | VIR | 3.987898 | 0.001527 |
| Bacteroidetes.Bacteroidia.Bacteroidales.Rikenellaceae.Alistipes.Otu0025                            | VIR | 3.854689 | 0.02626  |
| Bacteroidetes.Bacteroidia.Bacteroidales.Rikenellaceae.Alistipes.Otu0075                            | VIR | 2.945027 | 2.94E-05 |
| Bacteroidetes.Bacteroidia.Bacteroidales.Rikenellaceae.Alistipes.Otu0197                            | VIR | 2.191886 | 0.006474 |
| Bacteroidetes.Bacteroidia.Bacteroidales.Rikenellaceae.Alistipes.Otu0508                            | VIR | 2.119191 | 0.001046 |
| Firmicutes.Bacilli.Lactobacillales.Enterococcaceae                                                 | BAC | 3.367762 | 0.000146 |
| Firmicutes.Bacilli.Lactobacillales.Enterococcaceae.Enterococcus                                    | BAC | 3.364261 | 0.000153 |
| Firmicutes.Bacilli.Lactobacillales.Enterococcaceae.Enterococcus.Otu0009                            | BAC | 3.359233 | 0.000168 |
| Firmicutes.Bacilli.Lactobacillales.Enterococcaceae.Enterococcus.Otu0473                            | BAC | 2.537811 | 0.049355 |
| Firmicutes.Bacilli.Lactobacillales.Leuconostocaceae.Weissella                                      | BAC | 2.310907 | 0.049355 |
| Firmicutes.Bacilli.Lactobacillales.Streptococcaceae.Streptococcus.Otu1753                          | BAC | 3.465571 | 0.047379 |
| Firmicutes.Clostridia.Clostridiales.Clostridiaceae_1                                               | BAC | 3.538807 | 0.028311 |
| Firmicutes.Clostridia.Clostridiales.Clostridiaceae_1.Clostridium_sensu_stricto                     | BAC | 3.541443 | 0.020893 |
| Firmicutes.Clostridia.Clostridiales.Clostridiaceae_1.Clostridium_sensu_stricto.Otu0087             | BAC | 2.609544 | 0.042053 |
| Firmicutes.Clostridia.Clostridiales.Clostridiaceae_1.Clostridium_sensu_stricto.Otu0154             | BAC | 2.736277 | 0.02898  |
| Firmicutes.Clostridia.Clostridiales.Clostridiales_Incertae_Sedis_XI.Anaerococcus                   | BAC | 2.922977 | 0.011621 |
| Firmicutes.Clostridia.Clostridiales.Clostridiales_Incertae_Sedis_XI.Anaerococcus.Otu0290           | BAC | 2.921711 | 0.018453 |
| Firmicutes.Clostridia.Clostridiales.Clostridiales_Incertae_Sedis_XI.Peptoniphilus.Otu0584          | BAC | 2.564394 | 0.013905 |
| Firmicutes.Clostridia.Clostridiales.Clostridiales_Incertae_Sedis_XIII.Mogibacterium                | BAC | 2.445442 | 0.009312 |

|                                                                                                   |     |          |          |
|---------------------------------------------------------------------------------------------------|-----|----------|----------|
| Firmicutes.Clostridia.Clostridiales.Clostridiales_unclassified.Clostridiales_unclassified.Otu0295 | BAC | 2.335734 | 0.049355 |
| Firmicutes.Clostridia.Clostridiales.Clostridiales_unclassified.Clostridiales_unclassified.Otu0324 | VIR | 2.075075 | 0.036319 |
| Firmicutes.Clostridia.Clostridiales.Clostridiales_unclassified.Clostridiales_unclassified.Otu0618 | VIR | 2.255882 | 0.016434 |
| Firmicutes.Clostridia.Clostridiales.Clostridiales_unclassified.Clostridiales_unclassified.Otu0895 | VIR | 2.377217 | 0.023351 |
| Firmicutes.Clostridia.Clostridiales.Lachnospiraceae.Anaerostipes.Otu0060                          | BAC | 2.974879 | 0.006641 |
| Firmicutes.Clostridia.Clostridiales.Lachnospiraceae.Anaerostipes.Otu0302                          | BAC | 2.620615 | 0.032663 |
| Firmicutes.Clostridia.Clostridiales.Lachnospiraceae.Blautia.Otu0021                               | VIR | 3.313928 | 0.00246  |
| Firmicutes.Clostridia.Clostridiales.Lachnospiraceae.Blautia.Otu0103                               | VIR | 2.88622  | 0.000567 |
| Firmicutes.Clostridia.Clostridiales.Lachnospiraceae.Blautia.Otu0280                               | BAC | 2.115455 | 0.025897 |
| Firmicutes.Clostridia.Clostridiales.Lachnospiraceae.Clostridium_XIVa.Otu0035                      | VIR | 2.847164 | 0.010014 |
| Firmicutes.Clostridia.Clostridiales.Lachnospiraceae.Clostridium_XIVa.Otu0085                      | VIR | 3.430168 | 0.002193 |
| Firmicutes.Clostridia.Clostridiales.Lachnospiraceae.Clostridium_XIVa.Otu0107                      | BAC | 3.247237 | 0.00321  |
| Firmicutes.Clostridia.Clostridiales.Lachnospiraceae.Clostridium_XIVa.Otu0165                      | VIR | 2.696802 | 0.013648 |
| Firmicutes.Clostridia.Clostridiales.Lachnospiraceae.Clostridium_XIVa.Otu0182                      | VIR | 2.379707 | 0.04407  |
| Firmicutes.Clostridia.Clostridiales.Lachnospiraceae.Clostridium_XIVa.Otu0307                      | VIR | 2.170673 | 0.023351 |
| Firmicutes.Clostridia.Clostridiales.Lachnospiraceae.Clostridium_XIVa.Otu0503                      | VIR | 2.236775 | 0.01378  |
| Firmicutes.Clostridia.Clostridiales.Lachnospiraceae.Clostridium_XIVb                              | VIR | 3.643937 | 0.000133 |
| Firmicutes.Clostridia.Clostridiales.Lachnospiraceae.Clostridium_XIVb.Otu0116                      | VIR | 3.548322 | 0.007055 |
| Firmicutes.Clostridia.Clostridiales.Lachnospiraceae.Clostridium_XIVb.Otu0235                      | VIR | 2.860733 | 0.001799 |
| Firmicutes.Clostridia.Clostridiales.Lachnospiraceae.Clostridium_XIVb.Otu0376                      | VIR | 2.081809 | 0.004266 |
| Firmicutes.Clostridia.Clostridiales.Lachnospiraceae.Clostridium_XIVb.Otu0729                      | VIR | 2.089294 | 0.017966 |
| Firmicutes.Clostridia.Clostridiales.Lachnospiraceae.Coprococcus                                   | VIR | 3.129715 | 0.023596 |
| Firmicutes.Clostridia.Clostridiales.Lachnospiraceae.Coprococcus.Otu0125                           | VIR | 2.610679 | 0.014618 |
| Firmicutes.Clostridia.Clostridiales.Lachnospiraceae.Coprococcus.Otu0239                           | VIR | 2.557179 | 7.99E-05 |
| Firmicutes.Clostridia.Clostridiales.Lachnospiraceae.Coprococcus.Otu1504                           | VIR | 2.68431  | 0.023351 |
| Firmicutes.Clostridia.Clostridiales.Lachnospiraceae.Dorea                                         | VIR | 3.209513 | 0.037686 |
| Firmicutes.Clostridia.Clostridiales.Lachnospiraceae.Dorea.Otu0098                                 | VIR | 3.079587 | 0.000324 |
| Firmicutes.Clostridia.Clostridiales.Lachnospiraceae.Dorea.Otu0122                                 | VIR | 3.093075 | 2.53E-05 |
| Firmicutes.Clostridia.Clostridiales.Lachnospiraceae.Dorea.Otu0257                                 | BAC | 2.70052  | 0.035618 |
| Firmicutes.Clostridia.Clostridiales.Lachnospiraceae.Dorea.Otu1097                                 | BAC | 2.95365  | 0.032497 |
| Firmicutes.Clostridia.Clostridiales.Lachnospiraceae.Dorea.Otu1227                                 | VIR | 2.691266 | 0.038279 |
| Firmicutes.Clostridia.Clostridiales.Lachnospiraceae.Hespellia                                     | VIR | 2.195289 | 0.014692 |



|                                                                                          |     |          |          |
|------------------------------------------------------------------------------------------|-----|----------|----------|
| Firmicutes.Clostridia.Clostridiales.Lachnospiraceae.Hespellia.Otu0362                    | VIR | 2.182173 | 0.014692 |
| Firmicutes.Clostridia.Clostridiales.Lachnospiraceae.Lachnospiraceae_unclassified.Otu0016 | BAC | 4.131791 | 0.041327 |
| Firmicutes.Clostridia.Clostridiales.Lachnospiraceae.Lachnospiraceae_unclassified.Otu0063 | VIR | 3.330634 | 0.000976 |
| Firmicutes.Clostridia.Clostridiales.Lachnospiraceae.Lachnospiraceae_unclassified.Otu0066 | BAC | 3.056326 | 0.005601 |
| Firmicutes.Clostridia.Clostridiales.Lachnospiraceae.Lachnospiraceae_unclassified.Otu0129 | BAC | 2.687995 | 0.000354 |
| Firmicutes.Clostridia.Clostridiales.Lachnospiraceae.Lachnospiraceae_unclassified.Otu0136 | BAC | 2.678367 | 0.030924 |
| Firmicutes.Clostridia.Clostridiales.Lachnospiraceae.Lachnospiraceae_unclassified.Otu0144 | BAC | 2.933557 | 6.76E-05 |
| Firmicutes.Clostridia.Clostridiales.Lachnospiraceae.Lachnospiraceae_unclassified.Otu0153 | VIR | 2.735008 | 0.001436 |
| Firmicutes.Clostridia.Clostridiales.Lachnospiraceae.Lachnospiraceae_unclassified.Otu0209 | BAC | 2.84408  | 0.001113 |
| Firmicutes.Clostridia.Clostridiales.Lachnospiraceae.Lachnospiraceae_unclassified.Otu0268 | VIR | 2.188441 | 0.033839 |
| Firmicutes.Clostridia.Clostridiales.Lachnospiraceae.Lachnospiraceae_unclassified.Otu0276 | VIR | 2.309281 | 2.72E-05 |
| Firmicutes.Clostridia.Clostridiales.Lachnospiraceae.Lachnospiraceae_unclassified.Otu0298 | VIR | 2.219332 | 0.003703 |
| Firmicutes.Clostridia.Clostridiales.Lachnospiraceae.Lachnospiraceae_unclassified.Otu0468 | VIR | 2.167442 | 0.039897 |
| Firmicutes.Clostridia.Clostridiales.Lachnospiraceae.Lachnospiraceae_unclassified.Otu0472 | VIR | 2.030349 | 0.04381  |
| Firmicutes.Clostridia.Clostridiales.Lachnospiraceae.Lachnospiraceae_unclassified.Otu0489 | BAC | 2.642153 | 0.049355 |
| Firmicutes.Clostridia.Clostridiales.Lachnospiraceae.Lachnospiraceae_unclassified.Otu0511 | VIR | 2.085334 | 0.00179  |
| Firmicutes.Clostridia.Clostridiales.Lachnospiraceae.Lachnospiraceae_unclassified.Otu0806 | VIR | 2.592774 | 0.023351 |
| Firmicutes.Clostridia.Clostridiales.Lachnospiraceae.Lachnospiraceae_unclassified.Otu1115 | VIR | 2.318282 | 0.008365 |
| Firmicutes.Clostridia.Clostridiales.Lachnospiraceae.Lachnospiraceae_unclassified.Otu1450 | VIR | 2.67339  | 0.046297 |
| Firmicutes.Clostridia.Clostridiales.Lachnospiraceae.Oribacterium.Otu0337                 | BAC | 2.466759 | 0.005796 |
| Firmicutes.Clostridia.Clostridiales.Lachnospiraceae.Roseburia                            | VIR | 3.681243 | 0.031754 |
| Firmicutes.Clostridia.Clostridiales.Lachnospiraceae.Roseburia.Otu0034                    | VIR | 3.552313 | 0.00073  |
| Firmicutes.Clostridia.Clostridiales.Lachnospiraceae.Roseburia.Otu0340                    | VIR | 2.388698 | 0.001352 |
| Firmicutes.Clostridia.Clostridiales.Lachnospiraceae.Roseburia.Otu0351                    | VIR | 2.190834 | 0.001429 |
| Firmicutes.Clostridia.Clostridiales.Lachnospiraceae.Roseburia.Otu0433                    | VIR | 2.06012  | 0.025458 |
| Firmicutes.Clostridia.Clostridiales.Lachnospiraceae.Roseburia.Otu1372                    | VIR | 2.733437 | 0.023351 |
| Firmicutes.Clostridia.Clostridiales.Lachnospiraceae.Roseburia.Otu1528                    | VIR | 2.377559 | 0.038279 |
| Firmicutes.Clostridia.Clostridiales.Lachnospiraceae.Ruminococcus2                        | VIR | 3.206984 | 0.005185 |
| Firmicutes.Clostridia.Clostridiales.Lachnospiraceae.Ruminococcus2.Otu0051                | VIR | 2.983026 | 0.023217 |
| Firmicutes.Clostridia.Clostridiales.Lachnospiraceae.Ruminococcus2.Otu0213                | VIR | 2.030617 | 0.017202 |
| Firmicutes.Clostridia.Clostridiales.Lachnospiraceae.Ruminococcus2.Otu1764                | VIR | 2.586018 | 0.023351 |
| Firmicutes.Clostridia.Clostridiales.Peptostreptococcaceae                                | BAC | 3.628959 | 2.74E-07 |

|                                                                                          |     |          |          |
|------------------------------------------------------------------------------------------|-----|----------|----------|
| Firmicutes.Clostridia.Clostridiales.Peptostreptococcaceae.Clostridium_XI                 | BAC | 3.590344 | 3.53E-06 |
| Firmicutes.Clostridia.Clostridiales.Peptostreptococcaceae.Clostridium_XI.Otu0114         | BAC | 3.497929 | 8.18E-07 |
| Firmicutes.Clostridia.Clostridiales.Peptostreptococcaceae.Clostridium_XI.Otu1268         | BAC | 2.517768 | 0.032497 |
| Firmicutes.Clostridia.Clostridiales.Ruminococcaceae.Clostridium_IV.Otu0134               | VIR | 2.880988 | 0.013597 |
| Firmicutes.Clostridia.Clostridiales.Ruminococcaceae.Clostridium_IV.Otu0834               | VIR | 3.105283 | 0.023351 |
| Firmicutes.Clostridia.Clostridiales.Ruminococcaceae.Clostridium_IV.Otu0871               | VIR | 2.349559 | 0.046297 |
| Firmicutes.Clostridia.Clostridiales.Ruminococcaceae.Faecalibacterium.Otu0659             | VIR | 2.07379  | 0.000366 |
| Firmicutes.Clostridia.Clostridiales.Ruminococcaceae.Faecalibacterium.Otu0819             | VIR | 2.769859 | 0.006065 |
| Firmicutes.Clostridia.Clostridiales.Ruminococcaceae.Faecalibacterium.Otu1329             | VIR | 2.954595 | 0.023351 |
| Firmicutes.Clostridia.Clostridiales.Ruminococcaceae.Flavonifractor.Otu0232               | VIR | 2.644705 | 0.002717 |
| Firmicutes.Clostridia.Clostridiales.Ruminococcaceae.Flavonifractor.Otu0296               | VIR | 2.089906 | 0.004032 |
| Firmicutes.Clostridia.Clostridiales.Ruminococcaceae.Gemmiger                             | VIR | 2.753158 | 1.44E-05 |
| Firmicutes.Clostridia.Clostridiales.Ruminococcaceae.Gemmiger.Otu0048                     | VIR | 2.752501 | 1.61E-05 |
| Firmicutes.Clostridia.Clostridiales.Ruminococcaceae.Oscillibacter                        | VIR | 3.255863 | 0.024957 |
| Firmicutes.Clostridia.Clostridiales.Ruminococcaceae.Oscillibacter.Otu0084                | VIR | 2.994957 | 0.013955 |
| Firmicutes.Clostridia.Clostridiales.Ruminococcaceae.Oscillibacter.Otu0101                | VIR | 2.782931 | 0.006979 |
| Firmicutes.Clostridia.Clostridiales.Ruminococcaceae.Oscillibacter.Otu0271                | VIR | 2.7094   | 0.000203 |
| Firmicutes.Clostridia.Clostridiales.Ruminococcaceae.Oscillibacter.Otu0336                | BAC | 2.591076 | 0.049582 |
| Firmicutes.Clostridia.Clostridiales.Ruminococcaceae.Oscillibacter.Otu0419                | VIR | 2.042714 | 0.015693 |
| Firmicutes.Clostridia.Clostridiales.Ruminococcaceae.Oscillibacter.Otu0673                | VIR | 2.152622 | 0.023351 |
| Firmicutes.Clostridia.Clostridiales.Ruminococcaceae.Pseudoflavonifractor.Otu0218         | BAC | 2.111688 | 0.048295 |
| Firmicutes.Clostridia.Clostridiales.Ruminococcaceae.Ruminococcaceae_unclassified         | VIR | 3.354006 | 0.021478 |
| Firmicutes.Clostridia.Clostridiales.Ruminococcaceae.Ruminococcaceae_unclassified.Otu0062 | VIR | 2.846266 | 0.014162 |
| Firmicutes.Clostridia.Clostridiales.Ruminococcaceae.Ruminococcaceae_unclassified.Otu0180 | VIR | 2.585229 | 0.000627 |
| Firmicutes.Clostridia.Clostridiales.Ruminococcaceae.Ruminococcaceae_unclassified.Otu0194 | BAC | 2.143786 | 0.029271 |
| Firmicutes.Clostridia.Clostridiales.Ruminococcaceae.Ruminococcaceae_unclassified.Otu0221 | VIR | 2.409728 | 0.001294 |
| Firmicutes.Clostridia.Clostridiales.Ruminococcaceae.Ruminococcaceae_unclassified.Otu0306 | VIR | 2.904084 | 0.039897 |
| Firmicutes.Clostridia.Clostridiales.Ruminococcaceae.Ruminococcaceae_unclassified.Otu0321 | VIR | 2.729968 | 0.023351 |
| Firmicutes.Clostridia.Clostridiales.Ruminococcaceae.Ruminococcaceae_unclassified.Otu0330 | VIR | 2.26547  | 0.009614 |
| Firmicutes.Clostridia.Clostridiales.Ruminococcaceae.Ruminococcaceae_unclassified.Otu0385 | VIR | 2.33262  | 0.001558 |
| Firmicutes.Clostridia.Clostridiales.Ruminococcaceae.Ruminococcaceae_unclassified.Otu0616 | VIR | 2.854242 | 0.023351 |
| Firmicutes.Clostridia.Clostridiales.Ruminococcaceae.Ruminococcaceae_unclassified.Otu0793 | VIR | 2.530617 | 0.00875  |

|                                                                                                                                               |     |          |          |
|-----------------------------------------------------------------------------------------------------------------------------------------------|-----|----------|----------|
| Firmicutes.Clostridia.Clostridiales.Ruminococcaceae.Ruminococcaceae_unclassified.Otu0880                                                      | VIR | 2.195379 | 0.016841 |
| Firmicutes.Clostridia.Clostridiales.Ruminococcaceae.Ruminococcus.Otu0113                                                                      | VIR | 3.340934 | 0.049914 |
| Firmicutes.Clostridia.Clostridiales.Ruminococcaceae.Ruminococcus.Otu0270                                                                      | VIR | 2.54097  | 0.03974  |
| Firmicutes.Clostridia.Clostridiales.Ruminococcaceae.Sporobacter                                                                               | VIR | 2.167491 | 0.048037 |
| Firmicutes.Clostridia.Clostridiales.Ruminococcaceae.Sporobacter.Otu0202                                                                       | VIR | 2.277028 | 0.007728 |
| Firmicutes.Erysipelotrichia.Erysipelotrichales.Erysipelotrichaceae.Clostridium_XVIII.Otu0109                                                  | VIR | 3.079288 | 0.014651 |
| Firmicutes.Erysipelotrichia.Erysipelotrichales.Erysipelotrichaceae.Erysipelotrichaceae_unclassified.Otu0206                                   | VIR | 2.684436 | 0.017798 |
| Firmicutes.Firmicutes_unclassified.Firmicutes_unclassified.Firmicutes_unclassified.Firmicutes_unclassified.Otu0170                            | VIR | 2.017515 | 0.000878 |
| Firmicutes.Firmicutes_unclassified.Firmicutes_unclassified.Firmicutes_unclassified.Firmicutes_unclassified.Otu0229                            | VIR | 2.025081 | 0.042849 |
| Firmicutes.Negativicutes.Selenomonadales.Acidaminococcaceae                                                                                   | VIR | 4.195698 | 0.00467  |
| Firmicutes.Negativicutes.Selenomonadales.Acidaminococcaceae.Phascolarctobacterium.Otu0611                                                     | VIR | 2.271596 | 0.01875  |
| Firmicutes.Negativicutes.Selenomonadales.Veillonellaceae.Megasphaera.Otu0089                                                                  | BAC | 2.22112  | 0.04381  |
| Firmicutes.Negativicutes.Selenomonadales.Veillonellaceae.Veillonella.Otu0555                                                                  | BAC | 2.31581  | 0.032414 |
| Fusobacteria.Fusobacteriia.Fusobacteriales.Fusobacteriaceae.Fusobacterium.Otu0078                                                             | BAC | 3.32888  | 0.049355 |
| Fusobacteria.Fusobacteriia.Fusobacteriales.Fusobacteriaceae.Fusobacterium.Otu0422                                                             | BAC | 2.417381 | 0.047379 |
| Fusobacteria.Fusobacteriia.Fusobacteriales.Leptotrichiaceae.Leptotrichia.Otu0780                                                              | VIR | 2.580063 | 0.005975 |
| Lentisphaerae                                                                                                                                 | VIR | 2.535665 | 0.041072 |
| Lentisphaerae.Lentisphaeria                                                                                                                   | VIR | 2.626109 | 0.006853 |
| Lentisphaerae.Lentisphaeria.Victivallales                                                                                                     | VIR | 2.583593 | 0.006853 |
| Lentisphaerae.Lentisphaeria.Victivallales.Victivallaceae                                                                                      | VIR | 2.586756 | 0.006853 |
| Lentisphaerae.Lentisphaeria.Victivallales.Victivallaceae.Victivallis                                                                          | VIR | 2.628206 | 0.006853 |
| Proteobacteria.Alphaproteobacteria.Alphaproteobacteria_unclassified.Alphaproteobacteria_unclassified.Alphaproteobacteria_unclassified.Otu1003 | VIR | 2.459322 | 0.023351 |
| Proteobacteria.Betaproteobacteria.Burkholderiales.Sutterellaceae.Sutterella                                                                   | VIR | 3.784127 | 0.038352 |
| Proteobacteria.Betaproteobacteria.Burkholderiales.Sutterellaceae.Sutterella.Otu0029                                                           | VIR | 3.714506 | 0.038267 |
| Proteobacteria.Deltaproteobacteria                                                                                                            | VIR | 2.545365 | 0.003479 |
| Proteobacteria.Deltaproteobacteria.Desulfovibrionales                                                                                         | VIR | 2.46861  | 0.001036 |
| Proteobacteria.Deltaproteobacteria.Desulfovibrionales.Desulfovibrionaceae                                                                     | VIR | 2.469039 | 0.000249 |
| Proteobacteria.Deltaproteobacteria.Desulfovibrionales.Desulfovibrionaceae.Bilophila                                                           | VIR | 2.436349 | 0.000235 |
| Proteobacteria.Deltaproteobacteria.Desulfovibrionales.Desulfovibrionaceae.Bilophila.Otu0097                                                   | VIR | 2.421728 | 0.000194 |
| Proteobacteria.Epsilonproteobacteria.Campylobacteriales.Campylobacteraceae.Campylobacter.Otu0318                                              | BAC | 2.699616 | 0.025236 |
| Proteobacteria.Gammaproteobacteria.Enterobacteriales.Enterobacteriaceae.Enterobacter                                                          | BAC | 4.145008 | 0.010746 |
| Proteobacteria.Gammaproteobacteria.Enterobacteriales.Enterobacteriaceae.Enterobacter.Otu0006                                                  | BAC | 4.136803 | 0.012274 |

|                                                                                                                 |     |          |          |
|-----------------------------------------------------------------------------------------------------------------|-----|----------|----------|
| Proteobacteria.Gammaproteobacteria.Enterobacteriales.Enterobacteriaceae.Enterobacter.Otu0297                    | BAC | 2.451644 | 0.006602 |
| Proteobacteria.Gammaproteobacteria.Enterobacteriales.Enterobacteriaceae.Enterobacter.Otu1530                    | BAC | 2.825633 | 0.049355 |
| Proteobacteria.Gammaproteobacteria.Enterobacteriales.Enterobacteriaceae.Enterobacteriaceae_unclassified.Otu0777 | BAC | 2.619186 | 0.021315 |
